# Supplementary material for: Distinct patterns of within-host virus populations between two subgroups of human respiratory syncytial virus
Source: Springer Nature journal article supplement (doi:10.1038/s41467-021-25265-4), 2021-08-26
Supplement: MOESM4 [file 41467_2021_25265_MOESM4_ESM.pdf]

File Name: Supplementary Data 1

Description: This file lists all samples sequenced in this study with associated accession numbers of the raw sequencing reads and assembled consensus sequences. De-identified participant, sample, sequencing, and clinical information is also provided in this file. Samples included in the within-host virus diversity analysis are annotated under the 'Included\_in\_this\_study' column.
