# Supplementary material for: Distinct patterns of within-host virus populations between two subgroups of human respiratory syncytial virus
Source: Nat Commun. 2021 Aug 26;12:5125. doi: 10.1038/s41467-021-25265-4 (PMC8390747; doi:10.1038/s41467-021-25265-4)
Supplement: Supplementary file 5 — Supplementary Data 1 [file 41467_2021_25265_MOESM5_ESM.csv]

No	Included_in_this_study	Participant_ID	Sample_ID	Strain	Sample_accession1	Sample_accession2	Sequence_accession	Study	Sequencing_batch	Platform	RSV_subgroup	Host_group	Age_group	Host_sex	Country	City	RSV_season	Symptom_onset	Collection_date	Symptom_days	Hospitalisation	Fever	ReSVinet_score	Severity	Raw_count	Unique_RSV_reads	Percent_duplication	Read_depth	Genome_coverage
1	Yes	ES-001	ES-001	SE01A-0004-V02	SAMEA5870290	ERS3658778	LR699739	Birth cohort	1	MiSeq	B	Infant	3 to <6 mo	Female	Spain	Santiago de Compostela	17-18	2018/01/07	2018/01/08	1	No	Yes	6	Mild	4680563	441785	87	6460	100
2	Yes	ES-002	ES-002	SE01A-0005-V02	SAMEA5870291	ERS3658779	LR699738	Birth cohort	1	MiSeq	B	Infant	3 to <6 mo	Male	Spain	Santiago de Compostela	17-18	2017/12/29	2018/01/03	5	No	No	6	Mild	323314	39729	58	914	100
3	No	ES-003	ES-003	SE01A-0008-V02	SAMEA5870292	ERS3658780	LR699741	Birth cohort	1	MiSeq	B	Infant	3 to <6 mo	Male	Spain	Santiago de Compostela	17-18	2017/12/09	2017/12/15	6	No	No	4	Mild	571463	5435	47	126	99.9
4	No	ES-004	ES-004	SE01A-0017-V02	SAMEA5870293	ERS3658781	NA	Birth cohort	1	MiSeq	B	Infant	<3 mo	Female	Spain	Santiago de Compostela	17-18	2017/12/20	2017/12/29	9	No	No	6	Mild	479279	466	25	11	84.4
5	Yes	ES-005	ES-005	SE01A-0018-V02	SAMEA5870294	ERS3658782	LR699740	Birth cohort	1	MiSeq	B	Infant	3 to <6 mo	Female	Spain	Santiago de Compostela	17-18	2018/01/13	2018/01/16	3	No	Yes	9	Moderate	656179	70531	70	1656	100
6	Yes	ES-006	ES-006	SE01A-0023-V02	SAMEA5870295	ERS3658783	LR699742	Birth cohort	1	MiSeq	B	Infant	<3 mo	Male	Spain	Santiago de Compostela	17-18	2017/11/30	2017/12/01	1	No	No	0	Mild	1278140	134317	75	2615	100
7	Yes	ES-007	ES-007	SE01A-0025-V02	SAMEA5870296	ERS3658784	LR699743	Birth cohort	1	MiSeq	B	Infant	3 to <6 mo	Male	Spain	Santiago de Compostela	17-18	2018/01/25	2018/01/29	4	Yes	Yes	16	Severe	2961629	325166	84	5165	100
8	No	ES-008	ES-008	SE01A-0030-V02	SAMEA5870297	ERS3658785	NA	Birth cohort	1	MiSeq	B	Infant	<3 mo	Female	Spain	Santiago de Compostela	17-18	2017/12/22	2017/12/28	6	No	No	0	Mild	416569	86	13	2	30.4
9	Yes	ES-009	ES-009-01	SE01A-0031-V02-1	SAMEA5870298	ERS3658786	LR699744	Birth cohort	1	MiSeq	B	Infant	<3 mo	Female	Spain	Santiago de Compostela	17-18	2017/12/18	2017/12/20	2	No	No	4	Mild	3503558	318865	88	4943	100
10	No	ES-009	ES-009-02	SE01A-0031-V02-2	SAMEA5870299	ERS3658787	NA	Birth cohort	1	MiSeq	B	Infant	<3 mo	Female	Spain	Santiago de Compostela	17-18	2018/01/11	2018/01/15	4	No	No	3	Mild	393796	58	27	1	22.2
11	No	ES-010	ES-010	SE01A-0033-V02	SAMEA5870300	ERS3658788	NA	Birth cohort	1	MiSeq	B	Infant	<3 mo	Female	Spain	Santiago de Compostela	17-18	2018/01/01	2018/01/08	7	No	No	3	Mild	223796	815	33	19	66.5
12	Yes	ES-011	ES-011	SE01A-0043-V02	SAMEA8910528	ERS6593413	MZ515748	Birth cohort	2	NovaSeq 6000	B	Infant	>=6 mo	Male	Spain	Santiago de Compostela	18-19	2018/12/31	2019/01/04	4	NA	Yes	8	Moderate	2436836	54591	95	977	100
13	Yes	ES-012	ES-012	SE01A-0045-V02	SAMEA8910720	ERS6593605	MZ515943	Birth cohort	2	NovaSeq 6000	A	Infant	>=6 mo	Female	Spain	Santiago de Compostela	18-19	2018/12/21	2018/12/26	5	No	No	3	Mild	548956	19968	93	359	100
14	No	ES-013	ES-013	SE01A-0047-V02	SAMEA8910613	ERS6593498	MZ515686	Birth cohort	2	NovaSeq 6000	A	Infant	>=6 mo	Female	Spain	Santiago de Compostela	18-19	2019/01/02	2019/01/08	6	NA	Yes	9	Moderate	752718	1239	78	22	97.4
15	No	ES-014	ES-014	SE01A-0061-V02	SAMEA8910487	ERS6593372	MZ516117	Birth cohort	2	NovaSeq 6000	A	Infant	3 to <6 mo	Male	Spain	Santiago de Compostela	18-19	2019/01/20	2019/01/25	5	NA	Yes	5	Mild	1616072	3951	90	72	99.9
16	Yes	ES-015	ES-015	SE01A-0064-V02	SAMEA8910961	ERS6593846	MZ515851	Birth cohort	4	NovaSeq 6000	A	Infant	<3 mo	Male	Spain	Santiago de Compostela	18-19	NA	2018/11/28	NA	No	NA	NA	NA	1237211	50984	93	933	100
17	Yes	ES-016	ES-016	SE01A-0069-V02	SAMEA8910753	ERS6593638	MZ515902	Birth cohort	2	NovaSeq 6000	A	Infant	<3 mo	Female	Spain	Santiago de Compostela	18-19	2018/12/16	2018/12/19	3	No	No	5	Mild	1095723	69019	90	1246	100
18	Yes	ES-017	ES-017	SE01A-0070-V02	SAMEA8910560	ERS6593445	MZ515738	Birth cohort	2	NovaSeq 6000	B	Infant	<3 mo	Female	Spain	Santiago de Compostela	18-19	2018/12/08	2018/12/13	5	Yes	No	5	Mild	1494024	65518	93	1175	100
19	Yes	ES-018	ES-018	SE01A-0071-V02	SAMEA8910913	ERS6593798	MZ515984	Birth cohort	4	NovaSeq 6000	A	Infant	3 to <6 mo	Male	Spain	Santiago de Compostela	18-19	NA	2019/01/16	NA	No	NA	NA	NA	2319531	122674	92	2175	100
20	Yes	ES-019	ES-019	SE01A-0077-V02	SAMEA8910472	ERS6593357	MZ515887	Birth cohort	2	NovaSeq 6000	A	Infant	<3 mo	Male	Spain	Santiago de Compostela	18-19	2018/12/27	2019/01/02	6	No	No	6	Mild	1913803	37445	97	677	100
21	Yes	ES-020	ES-020	SE01A-0101-V02	SAMEA8910635	ERS6593520	MZ515938	Birth cohort	2	NovaSeq 6000	B	Infant	<3 mo	Female	Spain	Santiago de Compostela	18-19	NA	2019/03/05	NA	No	NA	NA	NA	1066419	79079	90	1423	100
22	Yes	ES-021	ES-021	SE01A-0102-V02	SAMEA8911161	ERS6594046	MZ516030	Birth cohort	4	NovaSeq 6000	B	Infant	>=6 mo	Male	Spain	Santiago de Compostela	19-20	NA	2019/12/19	NA	No	NA	NA	NA	2193861	69815	94	1288	100
23	Yes	ES-022	ES-022	SE01A-0106-V02	SAMEA8911240	ERS6594124	MZ515706	Birth cohort	4	NovaSeq 6000	A	Infant	>=6 mo	Male	Spain	Santiago de Compostela	19-20	2020/01/14	2020/01/15	1	NA	No	1	Mild	29273040	410295	98	4310	100
24	Yes	ES-023	ES-023	SE01A-0107-V02	SAMEA8911078	ERS6593963	MZ515961	Birth cohort	4	NovaSeq 6000	A	Infant	>=6 mo	Female	Spain	Santiago de Compostela	19-20	2020/01/06	2020/01/08	2	No	Yes	4	Mild	1210408	54208	91	996	100
25	Yes	ES-024	ES-024	SE01A-0108-V02	SAMEA8911083	ERS6593968	MZ515940	Birth cohort	4	NovaSeq 6000	A	Infant	>=6 mo	Male	Spain	Santiago de Compostela	19-20	NA	2019/12/19	NA	No	NA	NA	NA	6123281	328524	92	5060	100
26	Yes	ES-025	ES-025	SE01A-0109-V02	SAMEA8911057	ERS6593942	MZ516122	Birth cohort	4	NovaSeq 6000	B	Infant	>=6 mo	Male	Spain	Santiago de Compostela	19-20	2019/12/14	2019/12/16	2	No	No	2	Mild	4484737	117290	97	2066	100
27	Yes	ES-026	ES-026	SE01A-0110-V02	SAMEA8911045	ERS6593930	MZ516120	Birth cohort	4	NovaSeq 6000	A	Infant	>=6 mo	Male	Spain	Santiago de Compostela	19-20	2019/12/08	2019/12/09	1	NA	Yes	4	Mild	4004722	160478	94	2832	100
28	Yes	ES-027	ES-027	SE01A-0117-V02	SAMEA8910989	ERS6593874	MZ515863	Birth cohort	4	NovaSeq 6000	B	Infant	>=6 mo	Female	Spain	Santiago de Compostela	19-20	2019/12/01	2019/12/04	3	No	No	2	Mild	4122381	174058	95	2869	100
29	No	ES-028	ES-028	SE01A-0118-V02	SAMEA8911054	ERS6593939	NA	Birth cohort	4	NovaSeq 6000	B	Infant	>=6 mo	Female	Spain	Santiago de Compostela	19-20	2019/12/16	2019/12/19	3	No	Yes	8	Moderate	407275	238	68	4	50
30	Yes	ES-029	ES-029	SE01A-0119-V02	SAMEA8911149	ERS6594034	MZ516014	Birth cohort	4	NovaSeq 6000	A	Infant	>=6 mo	Male	Spain	Santiago de Compostela	19-20	2019/11/30	2019/12/03	3	NA	No	2	Mild	3071006	52933	96	971	100
31	Yes	ES-030	ES-030	SE01A-0120-V02	SAMEA8910949	ERS6593834	MZ515688	Birth cohort	4	NovaSeq 6000	A	Infant	>=6 mo	Male	Spain	Santiago de Compostela	19-20	2019/11/23	2019/11/25	2	No	No	4	Mild	665703	18942	87	345	100
32	Yes	ES-031	ES-031	SE01A-0123-V02	SAMEA8910981	ERS6593866	MZ516140	Birth cohort	4	NovaSeq 6000	B	Infant	>=6 mo	Female	Spain	Santiago de Compostela	19-20	2019/12/28	2019/12/30	2	NA	Yes	6	Mild	538410	32329	89	598	100
33	Yes	ES-032	ES-032	SE01A-0132-V02	SAMEA8910963	ERS6593848	MZ515972	Birth cohort	4	NovaSeq 6000	B	Infant	>=6 mo	Male	Spain	Santiago de Compostela	19-20	2020/01/23	2020/01/28	5	NA	No	5	Mild	3660147	160697	94	2772	100
34	Yes	ES-033	ES-033	SE01A-0133-V02	SAMEA8910917	ERS6593802	MZ516056	Birth cohort	4	NovaSeq 6000	B	Infant	>=6 mo	Male	Spain	Santiago de Compostela	19-20	NA	2020/01/14	NA	No	NA	NA	NA	19753903	380351	98	4522	100
35	Yes	ES-034	ES-034	SE01A-0135-V02	SAMEA8911124	ERS6594009	MZ516143	Birth cohort	4	NovaSeq 6000	B	Infant	>=6 mo	Female	Spain	Santiago de Compostela	19-20	2019/12/27	2019/12/30	3	NA	Yes	5	Mild	1122382	30071	89	555	100
36	No	ES-035	ES-035	SE01A-0137-V02	SAMEA8911006	ERS6593891	MZ515878	Birth cohort	4	NovaSeq 6000	A	Infant	>=6 mo	Male	Spain	Santiago de Compostela	19-20	2019/12/11	2019/12/11	0	No	No	7	Mild	640125	6294	87	114	99.1
37	No	ES-036	ES-036	SE01A-0139-V02	SAMEA8910952	ERS6593837	MZ515896	Birth cohort	4	NovaSeq 6000	A	Infant	>=6 mo	Female	Spain	Santiago de Compostela	19-20	2019/12/23	2019/12/23	0	No	No	1	Mild	592193	1244	77	23	96.2
38	Yes	ES-037	ES-037	SE01A-0141-V02	SAMEA8911103	ERS6593988	MZ515640	Birth cohort	4	NovaSeq 6000	A	Infant	3 to <6 mo	Male	Spain	Santiago de Compostela	19-20	2019/12/29	2019/12/31	2	NA	Yes	3	Mild	3746756	163124	92	2897	100
39	Yes	ES-038	ES-038	SE01A-0146-V02	SAMEA8910895	ERS6593780	MZ515860	Birth cohort	4	NovaSeq 6000	A	Infant	3 to <6 mo	Male	Spain	Santiago de Compostela	19-20	2019/11/20	2019/11/25	5	No	Yes	7	Mild	7712276	329496	95	4833	100
40	Yes	ES-039	ES-039	SE01A-0154-V02	SAMEA8910970	ERS6593855	MZ515583	Birth cohort	4	NovaSeq 6000	A	Infant	3 to <6 mo	Male	Spain	Santiago de Compostela	19-20	2019/12/19	2019/12/23	4	NA	Yes	5	Mild	1412997	16874	91	310	100
41	No	ES-040	ES-040	SE01A-0155-V02	SAMEA8910967	ERS6593852	NA	Birth cohort	4	NovaSeq 6000	B	Infant	3 to <6 mo	Male	Spain	Santiago de Compostela	19-20	2019/12/29	2019/12/30	1	NA	No	4	Mild	469355	142	68	3	42
42	Yes	ES-041	ES-041	SE01A-0160-V02	SAMEA8911192	ERS6594076	MZ515619	Birth cohort	4	NovaSeq 6000	A	Infant	3 to <6 mo	Male	Spain	Santiago de Compostela	19-20	2019/12/28	2019/12/30	2	NA	Yes	8	Moderate	1671155	51140	94	936	100
43	Yes	ES-042	ES-042	SE01A-0163-V02	SAMEA8910940	ERS6593825	MZ515941	Birth cohort	4	NovaSeq 6000	A	Infant	3 to <6 mo	Male	Spain	Santiago de Compostela	19-20	2019/12/05	2019/12/09	4	NA	No	5	Mild	2155079	113930	93	2002	100
44	Yes	ES-043	ES-043	SE01A-0167-V02	SAMEA8911085	ERS6593970	MZ515773	Birth cohort	4	NovaSeq 6000	A	Infant	3 to <6 mo	Male	Spain	Santiago de Compostela	19-20	2020/01/01	2020/01/02	1	No	No	4	Mild	1917425	103006	93	1879	100
45	Yes	ES-044	ES-044	SE01A-0168-V02	SAMEA8911049	ERS6593934	MZ515656	Birth cohort	4	NovaSeq 6000	B	Infant	3 to <6 mo	Male	Spain	Santiago de Compostela	19-20	NA	2019/12/18	NA	No	NA	NA	NA	1480923	97070	91	1767	100
46	No	ES-045	ES-045	SE01A-0172-V02	SAMEA8910939	ERS6593824	MZ515842	Birth cohort	4	NovaSeq 6000	A	Infant	3 to <6 mo	Female	Spain	Santiago de Compostela	19-20	2020/01/09	2020/01/10	1	NA	No	3	Mild	565079	5374	85	99	100
47	Yes	ES-046	ES-046	SE01A-0178-V02	SAMEA8910977	ERS6593862	MZ515872	Birth cohort	4	NovaSeq 6000	B	Infant	3 to <6 mo	Male	Spain	Santiago de Compostela	19-20	2020/01/10	2020/01/15	5	NA	No	3	Mild	5082288	116103	87	2116	100
48	Yes	ES-047	ES-047	SE01A-0186-V02	SAMEA8911214	ERS6594098	MZ516011	Birth cohort	4	NovaSeq 6000	A	Infant	3 to <6 mo	Male	Spain	Santiago de Compostela	19-20	2019/12/31	2020/01/07	7	No	Yes	3	Mild	1457506	79401	89	1442	100
49	Yes	ES-048	ES-048	SE01A-0194-V02	SAMEA8911041	ERS6593926	MZ516033	Birth cohort	4	NovaSeq 6000	A	Infant	3 to <6 mo	Female	Spain	Santiago de Compostela	19-20	2020/01/05	2020/01/08	3	NA	Yes	10	Moderate	2948833	72514	96	1320	100
50	Yes	ES-049	ES-049	SE01A-0196-V02	SAMEA8910945	ERS6593830	MZ515728	Birth cohort	4	NovaSeq 6000	B	Infant	<3 mo	Female	Spain	Santiago de Compostela	19-20	2019/12/14	2019/12/17	3	No	No	2	Mild	2942992	121628	95	2201	100
51	Yes	ES-050	ES-050	SE01A-0197-V02	SAMEA8911073	ERS6593958	MZ515776	Birth cohort	4	NovaSeq 6000	B	Infant	3 to <6 mo	Male	Spain	Santiago de Compostela	19-20	2020/01/18	2020/01/23	5	No	No	5	Mild	547603	12745	87	235	100
52	Yes	ES-051	ES-051	SE01A-0203-V02	SAMEA8910968	ERS6593853	MZ515715	Birth cohort	4	NovaSeq 6000	B	Infant	3 to <6 mo	Female	Spain	Santiago de Compostela	19-20	2020/01/18	2020/01/20	2	No	Yes	5	Mild	4796473	206426	94	3464	100
53	No	ES-052	ES-052	SE01A-0205-V02	SAMEA8911215	ERS6594099	MZ515912	Birth cohort	4	NovaSeq 6000	A	Infant	3 to <6 mo	Male	Spain	Santiago de Compostela	19-20	2020/01/13	2020/01/20	7	NA	No	2	Mild	539249	648	76	12	87.9
54	Yes	ES-053	ES-053-01	SE02-0001-V01	SAMEA8910756	ERS6593641	MZ515692	Infant case-control	2	NovaSeq 6000	A	Infant	<3 mo	Female	Spain	Santiago de Compostela	18-19	2018/12/01	2018/12/04	3	Yes	Yes	8	Moderate	1748779	30977	92	558	100
55	Yes	ES-053	ES-053-02	SE02-0001-D02	SAMEA8910710	ERS6593595	MZ516111	Infant case-control	2	NovaSeq 6000	A	Infant	<3 mo	Female	Spain	Santiago de Compostela	18-19	2018/12/01	2018/12/05	4	Yes	Yes	8	Moderate	620116	11023	86	197	100
56	No	ES-053	ES-053-03	SE02-0001-D03	SAMEA8910604	ERS6593489	MZ515760	Infant case-control	2	NovaSeq 6000	A	Infant	<3 mo	Female	Spain	Santiago de Compostela	18-19	2018/12/01	2018/12/06	5	Yes	Yes	8	Moderate	1211721	2725	81	49	98.7
57	No	ES-053	ES-053-04	SE02-0001-D04	SAMEA8910406	ERS6593292	MZ515676	Infant case-control	2	NovaSeq 6000	A	Infant	<3 mo	Female	Spain	Santiago de Compostela	18-19	2018/12/01	2018/12/07	6	Yes	Yes	8	Moderate	3342195	1210	87	22	94
58	No	ES-053	ES-053-05	SE02-0001-D05	SAMEA8910464	ERS6593349	MZ515642	Infant case-control	2	NovaSeq 6000	A	Infant	<3 mo	Female	Spain	Santiago de Compostela	18-19	2018/12/01	2018/12/08	7	Yes	Yes	8	Moderate	3700167	578	86	10	85.9
59	No	ES-053	ES-053-06	SE02-0001-D06	SAMEA8910750	ERS6593635	MZ515816	Infant case-control	2	NovaSeq 6000	A	Infant	<3 mo	Female	Spain	Santiago de Compostela	18-19	2018/12/01	2018/12/09	8	Yes	Yes	8	Moderate	1357895	406	83	7	75.1
60	No	ES-053	ES-053-07	SE02-0001-D07	SAMEA8910590	ERS6593475	NA	Infant case-control	2	NovaSeq 6000	A	Infant	<3 mo	Female	Spain	Santiago de Compostela	18-19	2018/12/01	2018/12/10	9	Yes	Yes	8	Moderate	355089	10	75	0	4
61	No	ES-053	ES-053-08	SE02-0001-D08	SAMEA8910450	ERS6593335	NA	Infant case-control	2	NovaSeq 6000	A	Infant	<3 mo	Female	Spain	Santiago de Compostela	18-19	2018/12/01	2018/12/11	10	Yes	Yes	8	Moderate	3858683	24	80	0	7.8
62	Yes	ES-054	ES-054-01	SE02-0002-V01	SAMEA8910582	ERS6593467	MZ516075	Infant case-control	2	NovaSeq 6000	A	Infant	<3 mo	Male	Spain	Santiago de Compostela	18-19	2018/12/21	2018/12/24	3	Yes	No	6	Mild	1927401	53233	94	952	100
63	Yes	ES-054	ES-054-02	SE02-0002-D02	SAMEA8910552	ERS6593437	MZ515579	Infant case-control	2	NovaSeq 6000	A	Infant	<3 mo	Male	Spain	Santiago de Compostela	18-19	2018/12/21	2018/12/25	4	Yes	No	6	Mild	802377	24371	94	437	100
64	Yes	ES-054	ES-054-03	SE02-0002-D03	SAMEA8910605	ERS6593490	MZ515585	Infant case-control	2	NovaSeq 6000	A	Infant	<3 mo	Male	Spain	Santiago de Compostela	18-19	2018/12/21	2018/12/26	5	Yes	No	6	Mild	487730	23676	91	425	100
65	Yes	ES-054	ES-054-04	SE02-0002-D04	SAMEA8910475	ERS6593360	MZ515873	Infant case-control	2	NovaSeq 6000	A	Infant	<3 mo	Male	Spain	Santiago de Compostela	18-19	2018/12/21	2018/12/27	6	Yes	No	6	Mild	704542	10931	88	197	100
66	No	ES-054	ES-054-05	SE02-0002-D05	SAMEA8910466	ERS6593351	NA	Infant case-control	2	NovaSeq 6000	A	Infant	<3 mo	Male	Spain	Santiago de Compostela	18-19	2018/12/21	2018/12/28	7	Yes	No	6	Mild	174126	140	75	2	43.2
67	Yes	ES-055	ES-055-01	SE02-0003-V01	SAMEA8910580	ERS6593465	MZ515956	Infant case-control	2	NovaSeq 6000	A	Infant	<3 mo	Male	Spain	Santiago de Compostela	18-19	2018/12/31	2019/01/03	3	Yes	No	7	Mild	528746	19218	91	346	100
68	No	ES-055	ES-055-02	SE02-0003-D02	SAMEA8910628	ERS6593513	MZ515588	Infant case-control	2	NovaSeq 6000	A	Infant	<3 mo	Male	Spain	Santiago de Compostela	18-19	2018/12/31	2019/01/04	4	Yes	No	7	Mild	210826	2560	79	47	99.9
69	Yes	ES-056	ES-056-01	SE02-0004-V01	SAMEA8910404	ERS6593290	MZ515608	Infant case-control	2	NovaSeq 6000	B	Infant	3 to <6 mo	Female	Spain	Santiago de Compostela	18-19	2018/12/27	2019/01/03	7	Yes	Yes	13	Moderate	884242	10461	90	188	100
70	No	ES-056	ES-056-02	SE02-0004-D02	SAMEA8910549	ERS6593434	NA	Infant case-control	2	NovaSeq 6000	B	Infant	3 to <6 mo	Female	Spain	Santiago de Compostela	18-19	2018/12/27	2019/01/04	8	Yes	Yes	13	Moderate	543877	30	85	1	7.3
71	No	ES-056	ES-056-03	SE02-0004-D03	SAMEA8910746	ERS6593631	NA	Infant case-control	2	NovaSeq 6000	B	Infant	3 to <6 mo	Female	Spain	Santiago de Compostela	18-19	2018/12/27	2019/01/05	9	Yes	Yes	13	Moderate	265847	11	82	0	4.8
72	No	ES-056	ES-056-04	SE02-0004-D04	SAMEA8910602	ERS6593487	NA	Infant case-control	2	NovaSeq 6000	B	Infant	3 to <6 mo	Female	Spain	Santiago de Compostela	18-19	2018/12/27	2019/01/06	10	Yes	Yes	13	Moderate	253059	3	85	0	0
73	No	ES-056	ES-056-05	SE02-0004-D05	SAMEA8910411	ERS6593297	NA	Infant case-control	2	NovaSeq 6000	B	Infant	3 to <6 mo	Female	Spain	Santiago de Compostela	18-19	2018/12/27	2019/01/07	11	Yes	Yes	13	Moderate	351418	1	86	0	0
74	No	ES-057	ES-057-01	SE02-0005-V01	SAMEA8910514	ERS6593399	MZ516114	Infant case-control	2	NovaSeq 6000	B	Infant	<3 mo	Male	Spain	Santiago de Compostela	18-19	2018/12/31	2019/01/04	4	Yes	Yes	8	Moderate	444529	8002	88	145	100
75	No	ES-057	ES-057-02	SE02-0005-D02	SAMEA8910397	ERS6593283	MZ515856	Infant case-control	2	NovaSeq 6000	B	Infant	<3 mo	Male	Spain	Santiago de Compostela	18-19	2018/12/31	2019/01/05	5	Yes	Yes	8	Moderate	1180100	1192	87	22	99.1
76	No	ES-057	ES-057-03	SE02-0005-D03	SAMEA8910420	ERS6593305	MZ515661	Infant case-control	2	NovaSeq 6000	B	Infant	<3 mo	Male	Spain	Santiago de Compostela	18-19	2018/12/31	2019/01/06	6	Yes	Yes	8	Moderate	493992	621	84	11	87.2
77	No	ES-057	ES-057-04	SE02-0005-D04	SAMEA8910460	ERS6593345	NA	Infant case-control	2	NovaSeq 6000	B	Infant	<3 mo	Male	Spain	Santiago de Compostela	18-19	2018/12/31	2019/01/07	7	Yes	Yes	8	Moderate	424603	7	86	0	0.8
78	No	ES-057	ES-057-05	SE02-0005-D05	SAMEA8910477	ERS6593362	NA	Infant case-control	2	NovaSeq 6000	B	Infant	<3 mo	Male	Spain	Santiago de Compostela	18-19	2018/12/31	2019/01/08	8	Yes	Yes	8	Moderate	829022	NA	NA	NA	NA
79	No	ES-058	ES-058-01	SE02-0006-V01	SAMEA8910456	ERS6593341	MZ515609	Infant case-control	2	NovaSeq 6000	A	Infant	<3 mo	Male	Spain	Santiago de Compostela	18-19	2019/01/07	2019/01/10	3	Yes	No	15	Severe	340884	5989	87	107	100
80	No	ES-058	ES-058-03	SE02-0006-D03	SAMEA8910521	ERS6593406	NA	Infant case-control	2	NovaSeq 6000	A	Infant	<3 mo	Male	Spain	Santiago de Compostela	18-19	2019/01/07	2019/01/12	5	Yes	No	15	Severe	295193	43	85	1	15.7
81	No	ES-058	ES-058-04	SE02-0006-D04	SAMEA8910425	ERS6593310	NA	Infant case-control	2	NovaSeq 6000	A	Infant	<3 mo	Male	Spain	Santiago de Compostela	18-19	2019/01/07	2019/01/13	6	Yes	No	15	Severe	202872	63	83	1	26.4
82	No	ES-058	ES-058-05	SE02-0006-D05	SAMEA8910711	ERS6593596	NA	Infant case-control	2	NovaSeq 6000	A	Infant	<3 mo	Male	Spain	Santiago de Compostela	18-19	2019/01/07	2019/01/14	7	Yes	No	15	Severe	275936	32	74	1	13.2
83	No	ES-058	ES-058-06	SE02-0006-D06	SAMEA8910658	ERS6593543	MZ516036	Infant case-control	2	NovaSeq 6000	A	Infant	<3 mo	Male	Spain	Santiago de Compostela	18-19	2019/01/07	2019/01/15	8	Yes	No	15	Severe	211761	719	77	13	90.9
84	No	ES-058	ES-058-07	SE02-0006-D07	SAMEA8910415	ERS6593301	MZ515920	Infant case-control	2	NovaSeq 6000	A	Infant	<3 mo	Male	Spain	Santiago de Compostela	18-19	2019/01/07	2019/01/16	9	Yes	No	15	Severe	298921	366	86	7	74.9
85	No	ES-058	ES-058-08	SE02-0006-D08	SAMEA8910717	ERS6593602	NA	Infant case-control	2	NovaSeq 6000	A	Infant	<3 mo	Male	Spain	Santiago de Compostela	18-19	2019/01/07	2019/01/17	10	Yes	No	15	Severe	225784	28	82	1	11.5
86	No	ES-058	ES-058-09	SE02-0006-D09	SAMEA8910670	ERS6593555	MZ516091	Infant case-control	2	NovaSeq 6000	A	Infant	<3 mo	Male	Spain	Santiago de Compostela	18-19	2019/01/07	2019/01/18	11	Yes	No	15	Severe	223314	435	76	8	79.5
87	Yes	ES-059	ES-059-01	SE02-0007-V01	SAMEA8910494	ERS6593379	MZ516007	Infant case-control	2	NovaSeq 6000	A	Infant	3 to <6 mo	Female	Spain	Santiago de Compostela	18-19	2019/01/11	2019/01/17	6	Yes	Yes	11	Moderate	498825	12477	93	223	100
88	Yes	ES-059	ES-059-02	SE02-0007-D02	SAMEA8910667	ERS6593552	MZ516031	Infant case-control	2	NovaSeq 6000	A	Infant	3 to <6 mo	Female	Spain	Santiago de Compostela	18-19	2019/01/11	2019/01/18	7	Yes	Yes	11	Moderate	370968	16590	90	301	100
89	No	ES-059	ES-059-03	SE02-0007-D03	SAMEA8910476	ERS6593361	NA	Infant case-control	2	NovaSeq 6000	A	Infant	3 to <6 mo	Female	Spain	Santiago de Compostela	18-19	2019/01/11	2019/01/19	8	Yes	Yes	11	Moderate	525348	117	85	2	41
90	No	ES-059	ES-059-04	SE02-0007-D04	SAMEA8910558	ERS6593443	MZ516071	Infant case-control	2	NovaSeq 6000	A	Infant	3 to <6 mo	Female	Spain	Santiago de Compostela	18-19	2019/01/11	2019/01/20	9	Yes	Yes	11	Moderate	1486616	2959	87	53	100
91	No	ES-059	ES-059-05	SE02-0007-D05	SAMEA8910617	ERS6593502	NA	Infant case-control	2	NovaSeq 6000	A	Infant	3 to <6 mo	Female	Spain	Santiago de Compostela	18-19	2019/01/11	2019/01/21	10	Yes	Yes	11	Moderate	392349	8	83	0	1
92	No	ES-059	ES-059-06	SE02-0007-D06	SAMEA8910458	ERS6593343	NA	Infant case-control	2	NovaSeq 6000	A	Infant	3 to <6 mo	Female	Spain	Santiago de Compostela	18-19	2019/01/11	2019/01/22	11	Yes	Yes	11	Moderate	780331	1	83	0	0
93	No	ES-059	ES-059-07	SE02-0007-D07	SAMEA8910734	ERS6593619	NA	Infant case-control	2	NovaSeq 6000	A	Infant	3 to <6 mo	Female	Spain	Santiago de Compostela	18-19	2019/01/11	2019/01/23	12	Yes	Yes	11	Moderate	282707	NA	NA	NA	NA
94	No	ES-059	ES-059-08	SE02-0007-D08	SAMEA8910588	ERS6593473	NA	Infant case-control	2	NovaSeq 6000	A	Infant	3 to <6 mo	Female	Spain	Santiago de Compostela	18-19	2019/01/11	2019/01/24	13	Yes	Yes	11	Moderate	208131	NA	NA	NA	NA
95	Yes	ES-060	ES-060-01	SE02-0008-V01	SAMEA8910603	ERS6593488	MZ516002	Infant case-control	2	NovaSeq 6000	A	Infant	<3 mo	Female	Spain	Santiago de Compostela	18-19	2019/01/28	2019/01/31	3	Yes	Yes	9	Moderate	1753544	94036	93	1669	100
96	No	ES-060	ES-060-02	SE02-0008-D02	SAMEA8910578	ERS6593463	MZ516004	Infant case-control	2	NovaSeq 6000	A	Infant	<3 mo	Female	Spain	Santiago de Compostela	18-19	2019/01/28	2019/02/01	4	Yes	Yes	9	Moderate	1357198	946	85	17	94.6
97	No	ES-060	ES-060-03	SE02-0008-D03	SAMEA8910651	ERS6593536	NA	Infant case-control	2	NovaSeq 6000	A	Infant	<3 mo	Female	Spain	Santiago de Compostela	18-19	2019/01/28	2019/02/02	5	Yes	Yes	9	Moderate	679496	281	77	5	51.9
98	No	ES-060	ES-060-05	SE02-0008-D05	SAMEA8910454	ERS6593339	NA	Infant case-control	2	NovaSeq 6000	A	Infant	<3 mo	Female	Spain	Santiago de Compostela	18-19	2019/01/28	2019/02/04	7	Yes	Yes	9	Moderate	2287223	NA	NA	NA	NA
99	No	ES-061	ES-061-01	SE02-0015-V01	SAMEA8911203	ERS6594087	MZ516142	Infant case-control	4	NovaSeq 6000	A	Infant	>=6 mo	Male	Spain	Santiago de Compostela	19-20	2019/11/16	2019/11/19	3	Yes	No	5	Mild	532368	894	72	16	89.1
100	No	ES-061	ES-061-02	SE02-0015-D02	SAMEA8911082	ERS6593967	MZ515987	Infant case-control	4	NovaSeq 6000	A	Infant	>=6 mo	Male	Spain	Santiago de Compostela	19-20	2019/11/16	2019/11/20	4	Yes	No	5	Mild	355783	1972	76	36	100
101	No	ES-061	ES-061-03	SE02-0015-D03	SAMEA8911183	ERS6594067	NA	Infant case-control	4	NovaSeq 6000	A	Infant	>=6 mo	Male	Spain	Santiago de Compostela	19-20	2019/11/16	2019/11/21	5	Yes	No	5	Mild	380204	9	64	0	2.5
102	No	ES-061	ES-061-04	SE02-0015-D04	SAMEA8911239	ERS6594123	NA	Infant case-control	4	NovaSeq 6000	A	Infant	>=6 mo	Male	Spain	Santiago de Compostela	19-20	2019/11/16	2019/11/22	6	Yes	No	5	Mild	472300	321	71	6	68.3
103	Yes	ES-062	ES-062	SE02-0016-V01	SAMEA8911095	ERS6593980	MZ515827	Infant case-control	4	NovaSeq 6000	B	Infant	>=6 mo	Female	Spain	Santiago de Compostela	19-20	2019/12/07	2019/12/11	4	No	No	3	Mild	703089	20003	87	367	100
104	Yes	ES-063	ES-063-01	SE02-0017-V01	SAMEA8910903	ERS6593788	MZ515930	Infant case-control	4	NovaSeq 6000	B	Infant	>=6 mo	Female	Spain	Santiago de Compostela	19-20	2019/12/07	2019/12/12	5	Yes	Yes	12	Moderate	816589	21634	79	394	100
105	No	ES-063	ES-063-04	SE02-0017-D04	SAMEA8911158	ERS6594043	MZ515684	Infant case-control	4	NovaSeq 6000	B	Infant	>=6 mo	Female	Spain	Santiago de Compostela	19-20	2019/12/07	2019/12/15	8	Yes	Yes	12	Moderate	484765	1730	76	32	99.9
106	Yes	ES-063	ES-063-05	SE02-0017-D05	SAMEA8911014	ERS6593899	MZ515899	Infant case-control	4	NovaSeq 6000	B	Infant	>=6 mo	Female	Spain	Santiago de Compostela	19-20	2019/12/07	2019/12/16	9	Yes	Yes	12	Moderate	482057	10333	74	189	100
107	Yes	ES-064	ES-064-01	SE02-0018-V01	SAMEA8911153	ERS6594038	MZ515963	Infant case-control	4	NovaSeq 6000	A	Infant	<3 mo	Male	Spain	Santiago de Compostela	19-20	2019/12/10	2019/12/12	2	Yes	Yes	11	Moderate	3568471	69888	97	1281	100
108	Yes	ES-064	ES-064-05	SE02-0018-D05	SAMEA8910904	ERS6593789	MZ515576	Infant case-control	4	NovaSeq 6000	A	Infant	<3 mo	Male	Spain	Santiago de Compostela	19-20	2019/12/10	2019/12/16	6	Yes	Yes	11	Moderate	872260	49137	91	886	100
109	No	ES-064	ES-064-06	SE02-0018-D06	SAMEA8910928	ERS6593813	NA	Infant case-control	4	NovaSeq 6000	A	Infant	<3 mo	Male	Spain	Santiago de Compostela	19-20	2019/12/10	2019/12/17	7	Yes	Yes	11	Moderate	501647	113	70	2	34
110	No	ES-064	ES-064-07	SE02-0018-D07	SAMEA8911100	ERS6593985	NA	Infant case-control	4	NovaSeq 6000	A	Infant	<3 mo	Male	Spain	Santiago de Compostela	19-20	2019/12/10	2019/12/18	8	Yes	Yes	11	Moderate	136942	26	72	0	10.3
111	No	ES-064	ES-064-08	SE02-0018-D08	SAMEA8911118	ERS6594003	NA	Infant case-control	4	NovaSeq 6000	A	Infant	<3 mo	Male	Spain	Santiago de Compostela	19-20	2019/12/10	2019/12/19	9	Yes	Yes	11	Moderate	588740	10	66	0	1.7
112	No	ES-064	ES-064-09	SE02-0018-D09	SAMEA8911147	ERS6594032	NA	Infant case-control	4	NovaSeq 6000	A	Infant	<3 mo	Male	Spain	Santiago de Compostela	19-20	2019/12/10	2019/12/20	10	Yes	Yes	11	Moderate	486988	2	50	0	0
113	No	ES-065	ES-065	SE02-0019-V01	SAMEA8911042	ERS6593927	MZ515629	Infant case-control	4	NovaSeq 6000	A	Infant	>=6 mo	Female	Spain	Santiago de Compostela	19-20	2019/12/20	2019/12/27	7	No	Yes	8	Moderate	641745	8893	91	162	99.8
114	Yes	ES-066	ES-066	SE02-0020-V01	SAMEA8911029	ERS6593914	MZ516020	Infant case-control	4	NovaSeq 6000	B	Infant	>=6 mo	Female	Spain	Santiago de Compostela	19-20	2019/12/25	2019/12/27	2	No	Yes	7	Mild	1681495	78930	92	1431	100
115	Yes	ES-067	ES-067-01	SE02-0021-V01	SAMEA8910969	ERS6593854	MZ515633	Infant case-control	4	NovaSeq 6000	A	Infant	<3 mo	Male	Spain	Santiago de Compostela	19-20	2019/12/25	2019/12/29	4	Yes	Yes	17	Severe	1021016	42647	92	781	100
116	Yes	ES-067	ES-067-02	SE02-0021-D02	SAMEA8910877	ERS6593762	MZ515804	Infant case-control	4	NovaSeq 6000	A	Infant	<3 mo	Male	Spain	Santiago de Compostela	19-20	2019/12/25	2019/12/30	5	Yes	Yes	17	Severe	816066	50844	90	928	100
117	Yes	ES-067	ES-067-03	SE02-0021-D03	SAMEA8910897	ERS6593782	MZ515962	Infant case-control	4	NovaSeq 6000	A	Infant	<3 mo	Male	Spain	Santiago de Compostela	19-20	2019/12/25	2019/12/31	6	Yes	Yes	17	Severe	552389	91166	78	1600	100
118	Yes	ES-067	ES-067-04	SE02-0021-D04	SAMEA8911157	ERS6594042	MZ515735	Infant case-control	4	NovaSeq 6000	A	Infant	<3 mo	Male	Spain	Santiago de Compostela	19-20	2019/12/25	2020/01/01	7	Yes	Yes	17	Severe	644816	13336	91	244	100
119	Yes	ES-067	ES-067-05	SE02-0021-D05	SAMEA8911063	ERS6593948	MZ515781	Infant case-control	4	NovaSeq 6000	A	Infant	<3 mo	Male	Spain	Santiago de Compostela	19-20	2019/12/25	2020/01/02	8	Yes	Yes	17	Severe	557835	21547	87	396	100
120	No	ES-067	ES-067-06	SE02-0021-D06	SAMEA8910944	ERS6593829	MZ515797	Infant case-control	4	NovaSeq 6000	A	Infant	<3 mo	Male	Spain	Santiago de Compostela	19-20	2019/12/25	2020/01/03	9	Yes	Yes	17	Severe	256223	2146	71	39	99.8
121	No	ES-067	ES-067-07	SE02-0021-D07	SAMEA8910874	ERS6593759	NA	Infant case-control	4	NovaSeq 6000	A	Infant	<3 mo	Male	Spain	Santiago de Compostela	19-20	2019/12/25	2020/01/04	10	Yes	Yes	17	Severe	167276	7	59	0	1.9
122	No	ES-067	ES-067-08	SE02-0021-D08	SAMEA8910896	ERS6593781	NA	Infant case-control	4	NovaSeq 6000	A	Infant	<3 mo	Male	Spain	Santiago de Compostela	19-20	2019/12/25	2020/01/05	11	Yes	Yes	17	Severe	222374	169	63	3	62.2
123	No	ES-067	ES-067-09	SE02-0021-D09	SAMEA8911210	ERS6594094	NA	Infant case-control	4	NovaSeq 6000	A	Infant	<3 mo	Male	Spain	Santiago de Compostela	19-20	2019/12/25	2020/01/06	12	Yes	Yes	17	Severe	550320	17	77	0	6.5
124	No	ES-067	ES-067-10	SE02-0021-D10	SAMEA8911080	ERS6593965	NA	Infant case-control	4	NovaSeq 6000	A	Infant	<3 mo	Male	Spain	Santiago de Compostela	19-20	2019/12/25	2020/01/07	13	Yes	Yes	17	Severe	436079	NA	NA	NA	NA
125	No	ES-068	ES-068-01	SE02-0022-V01	SAMEA8911119	ERS6594004	NA	Infant case-control	4	NovaSeq 6000	A	Infant	<3 mo	Female	Spain	Santiago de Compostela	19-20	2019/12/24	2019/12/30	6	Yes	No	7	Mild	476267	125	72	2	43.6
126	No	ES-068	ES-068-02	SE02-0022-D02	SAMEA8910882	ERS6593767	NA	Infant case-control	4	NovaSeq 6000	A	Infant	<3 mo	Female	Spain	Santiago de Compostela	19-20	2019/12/24	2019/12/31	7	Yes	No	7	Mild	419729	182	65	3	54.6
127	No	ES-068	ES-068-03	SE02-0022-D03	SAMEA8911130	ERS6594015	MZ515881	Infant case-control	4	NovaSeq 6000	A	Infant	<3 mo	Female	Spain	Santiago de Compostela	19-20	2019/12/24	2020/01/01	8	Yes	No	7	Mild	393802	365	73	7	79.4
128	No	ES-068	ES-068-04	SE02-0022-D04	SAMEA8910883	ERS6593768	NA	Infant case-control	4	NovaSeq 6000	A	Infant	<3 mo	Female	Spain	Santiago de Compostela	19-20	2019/12/24	2020/01/02	9	Yes	No	7	Mild	508389	48	70	1	18.6
129	Yes	ES-069	ES-069-01	SE02-0023-V01	SAMEA8911241	ERS6594125	MZ516100	Infant case-control	4	NovaSeq 6000	A	Infant	>=6 mo	Female	Spain	Santiago de Compostela	19-20	2020/01/01	2020/01/03	2	Yes	Yes	8	Moderate	1362531	13355	89	242	100
130	No	ES-069	ES-069-02	SE02-0023-D02	SAMEA8911217	ERS6594101	MZ516124	Infant case-control	4	NovaSeq 6000	A	Infant	>=6 mo	Female	Spain	Santiago de Compostela	19-20	2020/01/01	2020/01/04	3	Yes	Yes	8	Moderate	327508	385	74	7	83
131	No	ES-069	ES-069-03	SE02-0023-D03	SAMEA8911128	ERS6594013	MZ515693	Infant case-control	4	NovaSeq 6000	A	Infant	>=6 mo	Female	Spain	Santiago de Compostela	19-20	2020/01/01	2020/01/05	4	Yes	Yes	8	Moderate	915999	6387	82	116	100
132	No	ES-069	ES-069-04	SE02-0023-D04	SAMEA8911091	ERS6593976	NA	Infant case-control	4	NovaSeq 6000	A	Infant	>=6 mo	Female	Spain	Santiago de Compostela	19-20	2020/01/01	2020/01/06	5	Yes	Yes	8	Moderate	170169	81	78	2	26.2
133	No	ES-069	ES-069-05	SE02-0023-D05	SAMEA8911106	ERS6593991	MZ515867	Infant case-control	4	NovaSeq 6000	A	Infant	>=6 mo	Female	Spain	Santiago de Compostela	19-20	2020/01/01	2020/01/07	6	Yes	Yes	8	Moderate	256633	773	75	14	97.3
134	No	ES-069	ES-069-06	SE02-0023-D06	SAMEA8910936	ERS6593821	NA	Infant case-control	4	NovaSeq 6000	A	Infant	>=6 mo	Female	Spain	Santiago de Compostela	19-20	2020/01/01	2020/01/08	7	Yes	Yes	8	Moderate	483679	46	56	1	19.8
135	No	ES-070	ES-070	SE02-0024-V01	SAMEA8911024	ERS6593909	MZ515638	Infant case-control	4	NovaSeq 6000	B	Infant	>=6 mo	Female	Spain	Santiago de Compostela	19-20	2020/01/05	2020/01/08	3	No	No	2	Mild	91690	7464	68	137	100
136	No	ES-071	ES-071-01	SE02-0025-V01	SAMEA8910966	ERS6593851	NA	Infant case-control	4	NovaSeq 6000	A	Infant	<3 mo	Male	Spain	Santiago de Compostela	19-20	2020/01/07	2020/01/10	3	Yes	Yes	7	Mild	496007	193	70	4	67.8
137	No	ES-071	ES-071-02	SE02-0025-D02	SAMEA8910927	ERS6593812	NA	Infant case-control	4	NovaSeq 6000	A	Infant	<3 mo	Male	Spain	Santiago de Compostela	19-20	2020/01/07	2020/01/11	4	Yes	Yes	7	Mild	376463	19	57	0	10.2
138	No	ES-071	ES-071-03	SE02-0025-D03	SAMEA8910942	ERS6593827	NA	Infant case-control	4	NovaSeq 6000	A	Infant	<3 mo	Male	Spain	Santiago de Compostela	19-20	2020/01/07	2020/01/12	5	Yes	Yes	7	Mild	550990	38	68	1	16.8
139	No	ES-071	ES-071-04	SE02-0025-D04	SAMEA8910983	ERS6593868	NA	Infant case-control	4	NovaSeq 6000	A	Infant	<3 mo	Male	Spain	Santiago de Compostela	19-20	2020/01/07	2020/01/13	6	Yes	Yes	7	Mild	302617	NA	NA	NA	NA
140	Yes	ES-072	ES-072-01	SE02-0050-V01	SAMEA8911064	ERS6593949	MZ515771	Infant case-control	4	NovaSeq 6000	B	Infant	<3 mo	Female	Spain	Santiago de Compostela	18-19	2018/12/27	2018/12/30	3	Yes	Yes	12	Moderate	2048833	95154	93	1734	100
141	No	ES-072	ES-072-02	SE02-0050-D02	SAMEA8910931	ERS6593816	NA	Infant case-control	4	NovaSeq 6000	B	Infant	<3 mo	Female	Spain	Santiago de Compostela	18-19	2018/12/27	2018/12/31	4	Yes	Yes	12	Moderate	269715	97	68	2	39
142	No	ES-072	ES-072-03	SE02-0050-D03	SAMEA8911229	ERS6594113	MZ516083	Infant case-control	4	NovaSeq 6000	B	Infant	<3 mo	Female	Spain	Santiago de Compostela	18-19	2018/12/27	2019/01/01	5	Yes	Yes	12	Moderate	403325	3145	76	58	100
143	No	ES-072	ES-072-04	SE02-0050-D04	SAMEA8910991	ERS6593876	MZ516133	Infant case-control	4	NovaSeq 6000	B	Infant	<3 mo	Female	Spain	Santiago de Compostela	18-19	2018/12/27	2019/01/02	6	Yes	Yes	12	Moderate	357439	559	69	10	87.6
144	No	ES-073	ES-073-01	SE02-0051-V01	SAMEA8911028	ERS6593913	MZ515657	Infant case-control	4	NovaSeq 6000	B	Infant	<3 mo	Female	Spain	Santiago de Compostela	18-19	2019/01/14	2019/01/17	3	Yes	Yes	13	Moderate	345348	885	73	16	97.7
145	No	ES-073	ES-073-03	SE02-0051-D03	SAMEA8910947	ERS6593832	MZ516054	Infant case-control	4	NovaSeq 6000	B	Infant	<3 mo	Female	Spain	Santiago de Compostela	18-19	2019/01/14	2019/01/19	5	Yes	Yes	13	Moderate	385939	9116	75	164	100
146	No	ES-073	ES-073-04	SE02-0051-D04	SAMEA8911138	ERS6594023	NA	Infant case-control	4	NovaSeq 6000	B	Infant	<3 mo	Female	Spain	Santiago de Compostela	18-19	2019/01/14	2019/01/20	6	Yes	Yes	13	Moderate	299981	112	74	2	42.6
147	No	ES-073	ES-073-05	SE02-0051-D05	SAMEA8911148	ERS6594033	MZ516013	Infant case-control	4	NovaSeq 6000	B	Infant	<3 mo	Female	Spain	Santiago de Compostela	18-19	2019/01/14	2019/01/21	7	Yes	Yes	13	Moderate	704955	568	78	11	81.7
148	Yes	ES-074	ES-074-01	SE02-0100-V01	SAMEA8911163	ERS6594048	MZ515758	Infant case-control	4	NovaSeq 6000	A	Infant	>=6 mo	Male	Spain	Santiago de Compostela	19-20	2019/11/23	2019/11/26	3	Yes	Yes	10	Moderate	679131	12483	94	231	100
149	Yes	ES-074	ES-074-02	SE02-0100-D02	SAMEA8911200	ERS6594084	MZ516047	Infant case-control	4	NovaSeq 6000	A	Infant	>=6 mo	Male	Spain	Santiago de Compostela	19-20	2019/11/23	2019/11/27	4	Yes	Yes	10	Moderate	2130900	40417	91	734	100
150	Yes	ES-074	ES-074-03	SE02-0100-D03	SAMEA8911011	ERS6593896	MZ516066	Infant case-control	4	NovaSeq 6000	A	Infant	>=6 mo	Male	Spain	Santiago de Compostela	19-20	2019/11/23	2019/11/28	5	Yes	Yes	10	Moderate	1564585	26338	93	485	100
151	Yes	ES-074	ES-074-04	SE02-0100-D04	SAMEA8911131	ERS6594016	MZ515737	Infant case-control	4	NovaSeq 6000	A	Infant	>=6 mo	Male	Spain	Santiago de Compostela	19-20	2019/11/23	2019/11/29	6	Yes	Yes	10	Moderate	939162	13129	87	239	99.9
152	No	ES-074	ES-074-05	SE02-0100-D05	SAMEA8910953	ERS6593838	NA	Infant case-control	4	NovaSeq 6000	A	Infant	>=6 mo	Male	Spain	Santiago de Compostela	19-20	2019/11/23	2019/11/30	7	Yes	Yes	10	Moderate	641095	289	69	5	66.9
153	No	ES-074	ES-074-06	SE02-0100-D06	SAMEA8911115	ERS6594000	NA	Infant case-control	4	NovaSeq 6000	A	Infant	>=6 mo	Male	Spain	Santiago de Compostela	19-20	2019/11/23	2019/12/01	8	Yes	Yes	10	Moderate	440403	16	61	0	6.1
154	Yes	ES-075	ES-075-01	SE02-0101-V01	SAMEA8911087	ERS6593972	MZ515570	Infant case-control	4	NovaSeq 6000	A	Infant	>=6 mo	Male	Spain	Santiago de Compostela	19-20	2019/11/23	2019/11/29	6	Yes	Yes	10	Moderate	1113625	16843	92	309	100
155	No	ES-075	ES-075-02	SE02-0101-D02	SAMEA8911113	ERS6593998	NA	Infant case-control	4	NovaSeq 6000	A	Infant	>=6 mo	Male	Spain	Santiago de Compostela	19-20	2019/11/23	2019/11/30	7	Yes	Yes	10	Moderate	121451	57	58	1	24.7
156	No	ES-075	ES-075-03	SE02-0101-D03	SAMEA8910901	ERS6593786	MZ515885	Infant case-control	4	NovaSeq 6000	A	Infant	>=6 mo	Male	Spain	Santiago de Compostela	19-20	2019/11/23	2019/12/01	8	Yes	Yes	10	Moderate	266561	664	74	12	83.5
157	Yes	ES-076	ES-076-01	SE02-0102-V01	SAMEA8910941	ERS6593826	MZ516052	Infant case-control	4	NovaSeq 6000	A	Infant	<3 mo	Male	Spain	Santiago de Compostela	19-20	2019/12/16	2019/12/19	3	Yes	No	8	Moderate	590312	16207	82	296	100
158	No	ES-076	ES-076-02	SE02-0102-D02	SAMEA8910914	ERS6593799	MZ515796	Infant case-control	4	NovaSeq 6000	A	Infant	<3 mo	Male	Spain	Santiago de Compostela	19-20	2019/12/16	2019/12/20	4	Yes	No	8	Moderate	271242	1146	75	21	97.5
159	No	ES-076	ES-076-03	SE02-0102-D03	SAMEA8910992	ERS6593877	MZ515810	Infant case-control	4	NovaSeq 6000	A	Infant	<3 mo	Male	Spain	Santiago de Compostela	19-20	2019/12/16	2019/12/21	5	Yes	No	8	Moderate	125605	285	73	5	80.9
160	No	ES-077	ES-077-01	SE02-0103-V01	SAMEA8910974	ERS6593859	MZ516069	Infant case-control	4	NovaSeq 6000	A	Infant	<3 mo	Female	Spain	Santiago de Compostela	19-20	2019/12/15	2019/12/19	4	Yes	Yes	8	Moderate	99580	2928	68	53	97.1
161	No	ES-077	ES-077-02	SE02-0103-D02	SAMEA8911031	ERS6593916	MZ515777	Infant case-control	4	NovaSeq 6000	A	Infant	<3 mo	Female	Spain	Santiago de Compostela	19-20	2019/12/15	2019/12/20	5	Yes	Yes	8	Moderate	239361	5516	80	101	100
162	No	ES-077	ES-077-03	SE02-0103-D03	SAMEA8910880	ERS6593765	MZ515750	Infant case-control	4	NovaSeq 6000	A	Infant	<3 mo	Female	Spain	Santiago de Compostela	19-20	2019/12/15	2019/12/21	6	Yes	Yes	8	Moderate	509224	1604	74	29	95.7
163	No	ES-077	ES-077-04	SE02-0103-D04	SAMEA8911102	ERS6593987	NA	Infant case-control	4	NovaSeq 6000	A	Infant	<3 mo	Female	Spain	Santiago de Compostela	19-20	2019/12/15	2019/12/22	7	Yes	Yes	8	Moderate	261411	1	67	0	0
164	No	ES-077	ES-077-05	SE02-0103-D05	SAMEA8911039	ERS6593924	NA	Infant case-control	4	NovaSeq 6000	A	Infant	<3 mo	Female	Spain	Santiago de Compostela	19-20	2019/12/15	2019/12/23	8	Yes	Yes	8	Moderate	161198	NA	NA	NA	NA
165	No	ES-077	ES-077-06	SE02-0103-D06	SAMEA8911089	ERS6593974	NA	Infant case-control	4	NovaSeq 6000	A	Infant	<3 mo	Female	Spain	Santiago de Compostela	19-20	2019/12/15	2019/12/24	9	Yes	Yes	8	Moderate	160219	NA	NA	NA	NA
166	No	ES-077	ES-077-07	SE02-0103-D07	SAMEA8911021	ERS6593906	NA	Infant case-control	4	NovaSeq 6000	A	Infant	<3 mo	Female	Spain	Santiago de Compostela	19-20	2019/12/15	2019/12/25	10	Yes	Yes	8	Moderate	390393	NA	NA	NA	NA
167	No	GB-001	GB-001	IM02-0001-V01	SAMEA8911015	ERS6593900	MZ515719	Infant case-control	4	NovaSeq 6000	B	Infant	>=6 mo	Female	United Kingdom	London	18-19	2018/10/06	2018/10/08	2	No	No	1	Mild	454609	1933	74	36	100
168	Yes	GB-002	GB-002-01	IM02-0002-V01	SAMEA8911055	ERS6593940	MZ515613	Infant case-control	4	NovaSeq 6000	B	Infant	<3 mo	Male	United Kingdom	London	18-19	2018/11/14	2018/11/21	7	Yes	No	18	Severe	181954	13114	83	243	100
169	No	GB-002	GB-002-02	IM02-0002-D02	SAMEA8911120	ERS6594005	NA	Infant case-control	4	NovaSeq 6000	B	Infant	<3 mo	Male	United Kingdom	London	18-19	2018/11/14	2018/11/22	8	Yes	No	18	Severe	431881	133	71	2	33.3
170	No	GB-002	GB-002-03	IM02-0002-D03	SAMEA8911232	ERS6594116	MZ515630	Infant case-control	4	NovaSeq 6000	B	Infant	<3 mo	Male	United Kingdom	London	18-19	2018/11/14	2018/11/23	9	Yes	No	18	Severe	463036	1311	75	24	98.7
171	No	GB-003	GB-003-01	IM02-0003-V01	SAMEA8911002	ERS6593887	MZ515824	Infant case-control	4	NovaSeq 6000	B	Infant	<3 mo	Male	United Kingdom	London	18-19	2018/11/18	2018/11/23	5	Yes	No	NA	NA	384208	1456	73	27	99.7
172	No	GB-003	GB-003-02	IM02-0003-D02	SAMEA8910933	ERS6593818	NA	Infant case-control	4	NovaSeq 6000	B	Infant	<3 mo	Male	United Kingdom	London	18-19	2018/11/18	2018/11/24	6	Yes	No	NA	NA	448815	341	70	6	66.7
173	Yes	GB-004	GB-004-01	IM02-0004-V01	SAMEA8910924	ERS6593809	MZ515653	Infant case-control	4	NovaSeq 6000	B	Infant	<3 mo	Male	United Kingdom	London	18-19	2018/11/18	2018/11/23	5	Yes	No	18	Severe	2695461	99942	95	1831	100
174	No	GB-004	GB-004-04	IM02-0004-D04	SAMEA8911169	ERS6594053	MZ515978	Infant case-control	4	NovaSeq 6000	B	Infant	<3 mo	Male	United Kingdom	London	18-19	2018/11/18	2018/11/26	8	Yes	No	18	Severe	690876	8941	87	164	100
175	No	GB-004	GB-004-05	IM02-0004-D05	SAMEA8910934	ERS6593819	MZ515594	Infant case-control	4	NovaSeq 6000	B	Infant	<3 mo	Male	United Kingdom	London	18-19	2018/11/18	2018/11/27	9	Yes	No	18	Severe	211750	5055	82	93	99.7
176	No	GB-005	GB-005	IM02-0005-V01	SAMEA8911018	ERS6593903	MZ515882	Infant case-control	4	NovaSeq 6000	A	Infant	<3 mo	Female	United Kingdom	London	18-19	2018/11/19	2018/11/26	7	Yes	No	7	Mild	352313	7138	85	132	100
177	Yes	GB-006	GB-006-01	IM02-0006-V01	SAMEA8910956	ERS6593841	MZ515800	Infant case-control	4	NovaSeq 6000	A	Infant	<3 mo	Male	United Kingdom	London	18-19	2018/12/13	2018/12/17	4	Yes	No	17	Severe	4190567	281253	92	4561	100
178	No	GB-006	GB-006-02	IM02-0006-D02	SAMEA8911125	ERS6594010	MZ515815	Infant case-control	4	NovaSeq 6000	A	Infant	<3 mo	Male	United Kingdom	London	18-19	2018/12/13	2018/12/18	5	Yes	No	17	Severe	551246	4834	81	88	99.4
179	Yes	GB-006	GB-006-03	IM02-0006-D03	SAMEA8911218	ERS6594102	MZ515814	Infant case-control	4	NovaSeq 6000	A	Infant	<3 mo	Male	United Kingdom	London	18-19	2018/12/13	2018/12/19	6	Yes	No	17	Severe	2061944	163791	90	2965	100
180	No	GB-007	GB-007	IM02-0031-V01	SAMEA8911186	ERS6594070	MZ515698	Infant case-control	4	NovaSeq 6000	B	Infant	<3 mo	Male	United Kingdom	London	18-19	2018/11/18	2018/11/19	1	No	No	1	Mild	6535366	203537	96	3427	100
181	No	GB-008	GB-008	IM02-0032-V01	SAMEA8911060	ERS6593945	MZ515669	Infant case-control	4	NovaSeq 6000	B	Infant	<3 mo	Male	United Kingdom	London	18-19	2018/11/22	2018/11/26	4	Yes	No	10	Moderate	968508	8774	79	162	100
182	Yes	GB-009	GB-009	IM02-0033-V01	SAMEA8910908	ERS6593793	MZ515575	Infant case-control	4	NovaSeq 6000	A	Infant	<3 mo	Male	United Kingdom	London	18-19	2018/11/28	2018/11/30	2	No	Yes	4	Mild	488836	15628	83	288	100
183	Yes	GB-010	GB-010	IM02-0037-V01	SAMEA8911094	ERS6593979	MZ516072	Infant case-control	4	NovaSeq 6000	A	Infant	3 to <6 mo	Male	United Kingdom	London	18-19	2018/12/30	2019/01/02	3	No	Yes	4	Mild	2620083	138725	93	2472	100
184	Yes	GB-011	GB-011	OX01A-8052-V02	SAMEA8910634	ERS6593519	MZ516098	Birth cohort	2	NovaSeq 6000	B	Infant	>=6 mo	Male	United Kingdom	Oxford	18-19	2018/11/25	2018/11/30	5	No	Yes	7	Mild	2248273	74815	88	1341	100
185	No	GB-012	GB-012	OX01A-8053-V02	SAMEA8910705	ERS6593590	MZ515855	Birth cohort	2	NovaSeq 6000	B	Infant	3 to <6 mo	Male	United Kingdom	Oxford	18-19	2018/11/16	2018/11/23	7	No	No	1	Mild	425803	466	78	9	90.5
186	Yes	GB-013	GB-013	OX01A-8071-V02	SAMEA8910548	ERS6593433	MZ515809	Birth cohort	2	NovaSeq 6000	B	Infant	>=6 mo	Male	United Kingdom	Oxford	18-19	2018/12/02	2018/12/06	4	No	No	2	Mild	917449	16183	91	293	100
187	Yes	GB-014	GB-014	OX01A-8101-V02	SAMEA8910465	ERS6593350	MZ515924	Birth cohort	2	NovaSeq 6000	B	Infant	3 to <6 mo	Female	United Kingdom	Oxford	18-19	2018/10/18	2018/10/23	5	No	Yes	4	Mild	6935628	186438	97	2943	100
188	Yes	GB-015	GB-015	OX01A-8105-V02	SAMEA8910402	ERS6593288	MZ515905	Birth cohort	2	NovaSeq 6000	A	Infant	<3 mo	Male	United Kingdom	Oxford	18-19	2018/11/01	2018/11/05	4	NA	No	2	Mild	3841325	96187	97	1709	100
189	No	GB-016	GB-016	OX01A-8118-V02	SAMEA8910886	ERS6593771	MZ515837	Birth cohort	4	NovaSeq 6000	B	Infant	>=6 mo	Male	United Kingdom	Oxford	19-20	2019/11/08	2019/11/13	5	No	No	1	Mild	299817	4540	77	84	100
190	No	GB-017	GB-017	OX01A-8121-V02	SAMEA8910724	ERS6593609	NA	Birth cohort	2	NovaSeq 6000	B	Infant	>=6 mo	Male	United Kingdom	Oxford	18-19	2018/11/03	2018/11/06	3	No	No	5	Mild	388110	71	78	1	30.2
191	No	GB-018	GB-018	OX01A-8185-V02	SAMEA8910926	ERS6593811	MZ515745	Birth cohort	4	NovaSeq 6000	B	Infant	>=6 mo	Male	United Kingdom	Oxford	19-20	2019/12/15	2019/12/18	3	No	Yes	4	Mild	943600	2033	78	38	97.8
192	No	GB-019	GB-019	OX01A-8195-V02	SAMEA8910975	ERS6593860	NA	Birth cohort	4	NovaSeq 6000	B	Infant	3 to <6 mo	Female	United Kingdom	Oxford	19-20	2019/12/19	2019/12/19	0	NA	No	0	Mild	552609	214	73	4	47.6
193	Yes	GB-020	GB-020	OX01A-8214-V02	SAMEA8910988	ERS6593873	MZ515566	Birth cohort	4	NovaSeq 6000	A	Infant	3 to <6 mo	Male	United Kingdom	Oxford	19-20	2019/11/07	2019/11/08	1	No	No	0	Mild	2839154	196135	91	3364	100
194	Yes	GB-021	GB-021	OX01A-8272-V02	SAMEA8911047	ERS6593932	MZ515636	Birth cohort	4	NovaSeq 6000	B	Infant	3 to <6 mo	Male	United Kingdom	Oxford	19-20	2019/12/09	2019/12/12	3	No	No	3	Mild	1117762	15719	85	288	100
195	Yes	GB-022	GB-022	OX01A-8300-V02	SAMEA8911234	ERS6594118	MZ515732	Birth cohort	4	NovaSeq 6000	B	Infant	<3 mo	Female	United Kingdom	Oxford	19-20	2019/11/06	2019/11/15	9	No	No	1	Mild	8161294	249101	96	4171	100
196	No	GB-023	GB-023	OX01A-8315-V02	SAMEA8911233	ERS6594117	MZ515830	Birth cohort	4	NovaSeq 6000	B	Infant	3 to <6 mo	Female	United Kingdom	Oxford	19-20	2019/12/05	2019/12/09	4	No	No	2	Mild	771684	6969	80	127	100
197	Yes	GB-024	GB-024	OX01A-8334-V02	SAMEA8910937	ERS6593822	MZ515925	Birth cohort	4	NovaSeq 6000	B	Infant	3 to <6 mo	Male	United Kingdom	Oxford	19-20	2019/11/30	2019/12/04	4	NA	No	1	Mild	142091	14438	72	266	100
198	Yes	GB-025	GB-025	OX01A-8374-V02	SAMEA8911069	ERS6593954	MZ516073	Birth cohort	4	NovaSeq 6000	A	Infant	3 to <6 mo	Male	United Kingdom	Oxford	19-20	2019/12/02	2019/12/05	3	No	No	4	Mild	1390623	137245	86	2490	100
199	No	GB-026	GB-026	OX01A-8386-V02	SAMEA8911086	ERS6593971	NA	Birth cohort	4	NovaSeq 6000	A	Infant	3 to <6 mo	Male	United Kingdom	Oxford	19-20	2019/11/11	2019/11/19	8	No	No	0	Mild	470904	287	78	5	50.1
200	Yes	GB-027	GB-027	OX01A-8396-V02	SAMEA8911017	ERS6593902	MZ515679	Birth cohort	4	NovaSeq 6000	A	Infant	>=6 mo	Female	United Kingdom	Oxford	19-20	2019/12/31	2020/01/08	8	No	No	1	Mild	197757	13625	78	251	100
201	No	GB-028	GB-028	OX01A-8438-V02	SAMEA8910873	ERS6593758	MZ515923	Birth cohort	4	NovaSeq 6000	A	Infant	3 to <6 mo	Male	United Kingdom	Oxford	19-20	2019/11/11	2019/11/14	3	No	No	1	Mild	308138	7993	79	147	100
202	No	GB-029	GB-029	OX01A-8451-V02	SAMEA8910707	ERS6593592	NA	Birth cohort	2	NovaSeq 6000	A	Infant	NA	NA	United Kingdom	Oxford	18-19	2018/11/20	2018/11/27	7	No	No	1	Mild	365373	386	84	7	44.1
203	Yes	GB-030	GB-030	OX01A-8459-V02	SAMEA8910999	ERS6593884	MZ515928	Birth cohort	4	NovaSeq 6000	A	Infant	3 to <6 mo	Male	United Kingdom	Oxford	19-20	2019/12/04	2019/12/09	5	Yes	No	6	Mild	859463	33369	92	611	100
204	No	GB-031	GB-031	OX01A-8668-V02	SAMEA8911202	ERS6594086	MZ515582	Birth cohort	4	NovaSeq 6000	A	Infant	<3 mo	Female	United Kingdom	Oxford	19-20	2019/10/04	2019/10/10	6	Yes	No	13	Moderate	264845	652	72	12	97.3
205	Yes	GB-032	GB-032	OX01A-8711-V02	SAMEA8911016	ERS6593901	MZ515553	Birth cohort	4	NovaSeq 6000	B	Infant	<3 mo	Female	United Kingdom	Oxford	19-20	2019/10/26	2019/10/31	5	No	No	2	Mild	327391	10796	83	200	100
206	No	GB-033	GB-033	OX01A-8742-V02	SAMEA8910485	ERS6593370	MZ515832	Birth cohort	2	NovaSeq 6000	B	Infant	>=6 mo	Female	United Kingdom	Oxford	18-19	2018/11/30	2018/12/05	5	No	No	3	Mild	448788	940	86	17	98.6
207	Yes	GB-034	GB-034	OX01A-8757-V02	SAMEA8911129	ERS6594014	MZ515895	Birth cohort	4	NovaSeq 6000	B	Infant	3 to <6 mo	Female	United Kingdom	Oxford	19-20	2019/11/19	2019/11/22	3	No	No	5	Mild	8628383	217011	97	3496	100
208	No	GB-035	GB-035	OX01A-8819-V02	SAMEA8910728	ERS6593613	NA	Birth cohort	2	NovaSeq 6000	A	Infant	3 to <6 mo	Male	United Kingdom	Oxford	18-19	2018/10/24	2018/10/29	5	No	No	4	Mild	297700	377	82	7	49.6
209	Yes	GB-036	GB-036	OX01A-8880-V02	SAMEA8910984	ERS6593869	MZ515762	Birth cohort	4	NovaSeq 6000	B	Infant	3 to <6 mo	Male	United Kingdom	Oxford	18-19	2018/11/11	2018/11/15	4	No	No	3	Mild	3024733	182699	92	3261	100
210	Yes	GB-037	GB-037	OX01A-8960-V02	SAMEA8910990	ERS6593875	MZ516123	Birth cohort	4	NovaSeq 6000	B	Infant	>=6 mo	Female	United Kingdom	Oxford	19-20	2019/12/26	2019/12/31	5	No	Yes	8	Moderate	3734061	146604	94	2597	100
211	No	GB-038	GB-038	OX01A-8965-V02	SAMEA8910405	ERS6593291	NA	Birth cohort	2	NovaSeq 6000	B	Infant	>=6 mo	Male	United Kingdom	Oxford	18-19	2018/12/03	2018/12/11	8	No	Yes	2	Mild	1063873	15	82	0	7.5
212	No	GB-039	GB-039	OX01A-8972-V02	SAMEA8910478	ERS6593363	MZ515591	Birth cohort	2	NovaSeq 6000	B	Infant	>=6 mo	Male	United Kingdom	Oxford	18-19	2018/11/24	2018/11/27	3	No	No	2	Mild	739617	3226	86	58	100
213	Yes	GB-040	GB-040	OX01A-8998-V02	SAMEA8911197	ERS6594081	MZ515614	Birth cohort	4	NovaSeq 6000	A	Infant	>=6 mo	Male	United Kingdom	Oxford	19-20	2020/01/05	2020/01/09	4	No	No	3	Mild	1546920	89584	88	1628	100
214	Yes	GB-041	GB-041	OX02-8012-V01	SAMEA8910551	ERS6593436	MZ515756	Infant case-control	2	NovaSeq 6000	B	Infant	3 to <6 mo	Female	United Kingdom	Oxford	18-19	2018/11/18	2018/11/21	3	Yes	No	4	Mild	3148243	83575	95	1500	100
215	Yes	GB-042	GB-042-01	OX02-8017-V01	SAMEA8910948	ERS6593833	MZ515555	Infant case-control	4	NovaSeq 6000	A	Infant	<3 mo	Male	United Kingdom	Oxford	19-20	2019/11/23	2019/11/27	4	Yes	No	10	Moderate	650558	22015	87	406	100
216	No	GB-042	GB-042-02	OX02-8017-D02	SAMEA8911066	ERS6593951	MZ516128	Infant case-control	4	NovaSeq 6000	A	Infant	<3 mo	Male	United Kingdom	Oxford	19-20	2019/11/23	2019/11/28	5	Yes	No	10	Moderate	514006	2430	88	45	98.4
217	Yes	GB-043	GB-043	OX02-8031-V01	SAMEA8911000	ERS6593885	MZ515682	Infant case-control	4	NovaSeq 6000	A	Infant	>=6 mo	Male	United Kingdom	Oxford	19-20	2019/11/25	2019/11/28	3	No	Yes	5	Mild	1417229	105042	89	1896	100
218	Yes	GB-044	GB-044-01	OX02-8032-V01	SAMEA8910564	ERS6593449	MZ515559	Infant case-control	2	NovaSeq 6000	A	Infant	>=6 mo	Male	United Kingdom	Oxford	18-19	2018/11/05	2018/11/08	3	Yes	Yes	9	Moderate	2026385	53774	96	964	100
219	No	GB-044	GB-044-02	OX02-8032-D02	SAMEA8910423	ERS6593308	MZ515695	Infant case-control	2	NovaSeq 6000	A	Infant	>=6 mo	Male	United Kingdom	Oxford	18-19	2018/11/05	2018/11/09	4	Yes	Yes	9	Moderate	66350	4005	88	74	100
220	Yes	GB-045	GB-045	OX02-8047-V01	SAMEA8910539	ERS6593424	MZ515992	Infant case-control	2	NovaSeq 6000	A	Infant	>=6 mo	Male	United Kingdom	Oxford	18-19	2018/11/13	2018/11/16	3	Yes	Yes	6	Mild	2947722	129915	93	2251	100
221	No	GB-046	GB-046-01	OX02-8054-V01	SAMEA8910557	ERS6593442	MZ515618	Infant case-control	2	NovaSeq 6000	A	Infant	>=6 mo	Female	United Kingdom	Oxford	18-19	2018/11/19	2018/11/22	3	Yes	No	12	Moderate	153859	3063	87	55	95.2
222	No	GB-046	GB-046-02	OX02-8054-D02	SAMEA8910641	ERS6593526	MZ515768	Infant case-control	2	NovaSeq 6000	A	Infant	>=6 mo	Female	United Kingdom	Oxford	18-19	2018/11/19	2018/11/23	4	Yes	No	12	Moderate	212040	2987	82	54	98.8
223	Yes	GB-047	GB-047	OX02-8055-V01	SAMEA8911071	ERS6593956	MZ515903	Infant case-control	4	NovaSeq 6000	B	Infant	3 to <6 mo	Female	United Kingdom	Oxford	19-20	2019/11/26	2019/11/29	3	No	Yes	10	Moderate	1013335	27355	93	503	100
224	No	GB-048	GB-048	OX02-8085-D01	SAMEA8963476	ERS6646225	NA	Infant case-control	4	NovaSeq 6000	NA	Infant	>=6 mo	Male	United Kingdom	Oxford	19-20	2019/11/13	2019/11/15	2	No	No	1	Mild	482828	NA	NA	NA	0
225	Yes	GB-049	GB-049-01	OX02-8086-V01	SAMEA8911136	ERS6594021	MZ516017	Infant case-control	4	NovaSeq 6000	A	Infant	>=6 mo	Female	United Kingdom	Oxford	19-20	2019/11/17	2019/11/20	3	Yes	Yes	8	Moderate	6948823	153042	97	2737	100
226	Yes	GB-049	GB-049-03	OX02-8086-D03	SAMEA8911112	ERS6593997	MZ516086	Infant case-control	4	NovaSeq 6000	A	Infant	>=6 mo	Female	United Kingdom	Oxford	19-20	2019/11/17	2019/11/22	5	Yes	Yes	8	Moderate	856918	53412	89	948	100
227	No	GB-049	GB-049-04	OX02-8086-D04	SAMEA8911126	ERS6594011	MZ515626	Infant case-control	4	NovaSeq 6000	A	Infant	>=6 mo	Female	United Kingdom	Oxford	19-20	2019/11/17	2019/11/23	6	Yes	Yes	8	Moderate	314708	7941	86	146	99.5
228	No	GB-049	GB-049-05	OX02-8086-D05	SAMEA8910889	ERS6593774	NA	Infant case-control	4	NovaSeq 6000	A	Infant	>=6 mo	Female	United Kingdom	Oxford	19-20	2019/11/17	2019/11/24	7	Yes	Yes	8	Moderate	429105	271	68	5	60.4
229	No	GB-050	GB-050	OX02-8110-V01	SAMEA8910492	ERS6593377	MZ516021	Infant case-control	2	NovaSeq 6000	B	Infant	<3 mo	Male	United Kingdom	Oxford	18-19	2018/11/22	2018/11/27	5	Yes	No	8	Moderate	189215	7483	87	136	100
230	Yes	GB-051	GB-051	OX02-8111-V01	SAMEA8910495	ERS6593380	MZ515848	Infant case-control	2	NovaSeq 6000	A	Infant	>=6 mo	Female	United Kingdom	Oxford	18-19	2018/11/06	2018/11/08	2	No	Yes	6	Mild	1703171	42873	94	764	100
231	Yes	GB-052	GB-052-01	OX02-8128-V01	SAMEA8910767	ERS6593652	MZ516105	Infant case-control	2	NovaSeq 6000	B	Infant	<3 mo	Female	United Kingdom	Oxford	18-19	2019/01/31	2019/02/05	5	Yes	No	10	Moderate	1084701	31338	91	568	100
232	Yes	GB-052	GB-052-02	OX02-8128-D02	SAMEA8910646	ERS6593531	MZ515778	Infant case-control	2	NovaSeq 6000	B	Infant	<3 mo	Female	United Kingdom	Oxford	18-19	2019/01/31	2019/02/06	6	Yes	No	10	Moderate	302346	18715	85	338	100
233	No	GB-052	GB-052-03	OX02-8128-D03	SAMEA8910615	ERS6593500	MZ515774	Infant case-control	2	NovaSeq 6000	B	Infant	<3 mo	Female	United Kingdom	Oxford	18-19	2019/01/31	2019/02/07	7	Yes	No	10	Moderate	200082	388	80	7	71
234	No	GB-052	GB-052-04	OX02-8128-D04	SAMEA8911180	ERS6594064	NA	Infant case-control	4	NovaSeq 6000	B	Infant	<3 mo	Female	United Kingdom	Oxford	18-19	2019/01/31	2019/02/08	8	Yes	No	10	Moderate	217678	487	81	9	61
235	No	GB-053	GB-053-01	OX02-8132-V01	SAMEA8910732	ERS6593617	MZ515752	Infant case-control	2	NovaSeq 6000	A	Infant	<3 mo	Male	United Kingdom	Oxford	18-19	2018/12/01	2018/12/05	4	Yes	No	18	Severe	263201	7638	85	140	100
236	No	GB-053	GB-053-02	OX02-8132-D02	SAMEA8910706	ERS6593591	MZ515795	Infant case-control	2	NovaSeq 6000	A	Infant	<3 mo	Male	United Kingdom	Oxford	18-19	2018/12/01	2018/12/06	5	Yes	No	18	Severe	215194	1684	79	31	98.9
237	No	GB-053	GB-053-03	OX02-8132-D03	SAMEA8910619	ERS6593504	MZ516096	Infant case-control	2	NovaSeq 6000	A	Infant	<3 mo	Male	United Kingdom	Oxford	18-19	2018/12/01	2018/12/07	6	Yes	No	18	Severe	272544	1994	80	36	99.5
238	No	GB-053	GB-053-07	OX02-8132-D07	SAMEA8910595	ERS6593480	NA	Infant case-control	2	NovaSeq 6000	A	Infant	<3 mo	Male	United Kingdom	Oxford	18-19	2018/12/01	2018/12/11	10	Yes	No	18	Severe	7182	4	88	0	1.9
239	Yes	GB-054	GB-054-01	OX02-8168-D01	SAMEA5870284	ERS3658772	LR699315	Infant case-control	1	MiSeq	A	Infant	<3 mo	Female	United Kingdom	Oxford	17-18	2018/01/08	2018/01/11	3	Yes	No	16	Severe	320553	13586	54	326	100
240	No	GB-054	GB-054-02	OX02-8168-D02	SAMEA8910672	ERS6593557	MZ515811	Infant case-control	2	NovaSeq 6000	A	Infant	<3 mo	Female	United Kingdom	Oxford	17-18	2018/01/08	2018/01/12	4	Yes	No	16	Severe	250041	6302	85	113	100
241	No	GB-054	GB-054-06	OX02-8168-D06	SAMEA8910545	ERS6593430	MZ516106	Infant case-control	2	NovaSeq 6000	A	Infant	<3 mo	Female	United Kingdom	Oxford	17-18	2018/01/08	2018/01/16	8	Yes	No	16	Severe	481058	886	85	16	95.8
242	No	GB-054	GB-054-07	OX02-8168-D07	SAMEA8910459	ERS6593344	NA	Infant case-control	2	NovaSeq 6000	A	Infant	<3 mo	Female	United Kingdom	Oxford	17-18	2018/01/08	2018/01/17	9	Yes	No	16	Severe	613321	15	86	0	6.7
243	No	GB-054	GB-054-08	OX02-8168-D08	SAMEA8911178	ERS6594062	MZ515915	Infant case-control	4	NovaSeq 6000	A	Infant	<3 mo	Female	United Kingdom	Oxford	17-18	2018/01/08	2018/01/18	10	Yes	No	16	Severe	249670	1824	76	32	97.4
244	No	GB-054	GB-054-09	OX02-8168-D09	SAMEA8910665	ERS6593550	NA	Infant case-control	2	NovaSeq 6000	A	Infant	<3 mo	Female	United Kingdom	Oxford	17-18	2018/01/08	2018/01/19	11	Yes	No	16	Severe	254234	47	79	1	18.3
245	No	GB-055	GB-055	OX02-8175-V01	SAMEA8910469	ERS6593354	MZ515958	Infant case-control	2	NovaSeq 6000	A	Infant	<3 mo	Female	United Kingdom	Oxford	18-19	2018/11/30	2018/12/04	4	Yes	No	14	Severe	334824	953	88	17	96.5
246	No	GB-056	GB-056-01	OX02-8182-V01	SAMEA8910416	ERS6593302	NA	Infant case-control	2	NovaSeq 6000	B	Infant	<3 mo	Male	United Kingdom	Oxford	18-19	2018/11/08	2018/11/12	4	Yes	No	11	Moderate	422700	107	86	2	42.5
247	Yes	GB-056	GB-056-02	OX02-8182-D02	SAMEA8910639	ERS6593524	MZ515775	Infant case-control	2	NovaSeq 6000	B	Infant	<3 mo	Male	United Kingdom	Oxford	18-19	2018/11/08	2018/11/13	5	Yes	No	11	Moderate	672683	10666	84	193	100
248	No	GB-056	GB-056-03	OX02-8182-D03	SAMEA8910643	ERS6593528	NA	Infant case-control	2	NovaSeq 6000	B	Infant	<3 mo	Male	United Kingdom	Oxford	18-19	2018/11/08	2018/11/14	6	Yes	No	11	Moderate	721813	147	78	3	49.1
249	Yes	GB-057	GB-057	OX02-8191-D01	SAMEA5870285	ERS3658773	LR699726	Infant case-control	1	MiSeq	B	Infant	<3 mo	Female	United Kingdom	Oxford	17-18	2017/12/14	2017/12/21	7	Yes	Yes	13	Moderate	688518	27816	50	650	100
250	Yes	GB-058	GB-058-01	OX02-8221-V01	SAMEA8911007	ERS6593892	MZ516081	Infant case-control	4	NovaSeq 6000	B	Infant	<3 mo	Female	United Kingdom	Oxford	19-20	2019/11/06	2019/11/09	3	Yes	No	18	Severe	1574817	101767	92	1864	100
251	Yes	GB-058	GB-058-02	OX02-8221-D02	SAMEA8911096	ERS6593981	MZ515726	Infant case-control	4	NovaSeq 6000	B	Infant	<3 mo	Female	United Kingdom	Oxford	19-20	2019/11/06	2019/11/10	4	Yes	No	18	Severe	750849	52824	89	966	100
252	Yes	GB-058	GB-058-04	OX02-8221-D04	SAMEA8910916	ERS6593801	MZ515791	Infant case-control	4	NovaSeq 6000	B	Infant	<3 mo	Female	United Kingdom	Oxford	19-20	2019/11/06	2019/11/12	6	Yes	No	18	Severe	1310999	99984	89	1802	100
253	Yes	GB-058	GB-058-05	OX02-8221-D05	SAMEA8910910	ERS6593795	MZ515857	Infant case-control	4	NovaSeq 6000	B	Infant	<3 mo	Female	United Kingdom	Oxford	19-20	2019/11/06	2019/11/13	7	Yes	No	18	Severe	1145007	72561	83	1332	100
254	No	GB-058	GB-058-06	OX02-8221-D06	SAMEA8911105	ERS6593990	MZ515753	Infant case-control	4	NovaSeq 6000	B	Infant	<3 mo	Female	United Kingdom	Oxford	19-20	2019/11/06	2019/11/14	8	Yes	No	18	Severe	492838	3783	80	70	100
255	No	GB-058	GB-058-07	OX02-8221-D07	SAMEA8911050	ERS6593935	MZ515935	Infant case-control	4	NovaSeq 6000	B	Infant	<3 mo	Female	United Kingdom	Oxford	19-20	2019/11/06	2019/11/15	9	Yes	No	18	Severe	375883	1241	76	23	91.5
256	No	GB-058	GB-058-10	OX02-8221-D10	SAMEA8911027	ERS6593912	NA	Infant case-control	4	NovaSeq 6000	B	Infant	<3 mo	Female	United Kingdom	Oxford	19-20	2019/11/06	2019/11/18	12	Yes	No	18	Severe	384405	181	69	3	51
257	No	GB-058	GB-058-11	OX02-8221-D11	SAMEA8911116	ERS6594001	NA	Infant case-control	4	NovaSeq 6000	B	Infant	<3 mo	Female	United Kingdom	Oxford	19-20	2019/11/06	2019/11/19	13	Yes	No	18	Severe	721745	18	76	0	7.8
258	No	GB-058	GB-058-12	OX02-8221-D12	SAMEA8910960	ERS6593845	NA	Infant case-control	4	NovaSeq 6000	B	Infant	<3 mo	Female	United Kingdom	Oxford	19-20	2019/11/06	2019/11/20	14	Yes	No	18	Severe	347119	5	62	0	1
259	No	GB-058	GB-058-13	OX02-8221-D13	SAMEA8911164	ERS6594049	NA	Infant case-control	4	NovaSeq 6000	B	Infant	<3 mo	Female	United Kingdom	Oxford	19-20	2019/11/06	2019/11/21	15	Yes	No	18	Severe	452773	4	71	0	0
260	No	GB-058	GB-058-14	OX02-8221-D14	SAMEA8911208	ERS6594092	NA	Infant case-control	4	NovaSeq 6000	B	Infant	<3 mo	Female	United Kingdom	Oxford	19-20	2019/11/06	2019/11/22	16	Yes	No	18	Severe	634775	NA	NA	NA	NA
261	Yes	GB-059	GB-059-01	OX02-8234-V01	SAMEA8910629	ERS6593514	MZ516092	Infant case-control	2	NovaSeq 6000	A	Infant	>=6 mo	Female	United Kingdom	Oxford	18-19	2018/11/13	2018/11/19	6	Yes	Yes	10	Moderate	1199496	35373	90	642	100
262	Yes	GB-059	GB-059-02	OX02-8234-D02	SAMEA8910556	ERS6593441	MZ515927	Infant case-control	2	NovaSeq 6000	A	Infant	>=6 mo	Female	United Kingdom	Oxford	18-19	2018/11/13	2018/11/20	7	Yes	Yes	10	Moderate	513903	20729	88	375	100
263	No	GB-059	GB-059-03	OX02-8234-D03	SAMEA8910520	ERS6593405	MZ515891	Infant case-control	2	NovaSeq 6000	A	Infant	>=6 mo	Female	United Kingdom	Oxford	18-19	2018/11/13	2018/11/21	8	Yes	Yes	10	Moderate	1205749	9033	89	163	100
264	No	GB-060	GB-060	OX02-8247-V01	SAMEA8910489	ERS6593374	MZ515556	Infant case-control	2	NovaSeq 6000	A	Infant	3 to <6 mo	Male	United Kingdom	Oxford	18-19	2018/12/02	2018/12/05	3	Yes	No	8	Moderate	860885	641	87	11	76
265	No	GB-061	GB-061	OX02-8259-V01	SAMEA8910978	ERS6593863	MZ515949	Infant case-control	4	NovaSeq 6000	A	Infant	3 to <6 mo	Female	United Kingdom	Oxford	19-20	2019/11/23	2019/11/27	4	Yes	No	5	Mild	423182	1728	85	32	74.4
266	Yes	GB-062	GB-062-01	OX02-8260-V01	SAMEA8911032	ERS6593917	MZ516015	Infant case-control	4	NovaSeq 6000	A	Infant	<3 mo	Female	United Kingdom	Oxford	19-20	2019/11/05	2019/11/08	3	Yes	No	7	Mild	1950243	51040	95	938	100
267	No	GB-062	GB-062-03	OX02-8260-D03	SAMEA8910946	ERS6593831	MZ515864	Infant case-control	4	NovaSeq 6000	A	Infant	<3 mo	Female	United Kingdom	Oxford	19-20	2019/11/05	2019/11/10	5	Yes	No	7	Mild	298098	5543	73	102	100
268	No	GB-062	GB-062-04	OX02-8260-D04	SAMEA8911228	ERS6594112	MZ515998	Infant case-control	4	NovaSeq 6000	A	Infant	<3 mo	Female	United Kingdom	Oxford	19-20	2019/11/05	2019/11/11	6	Yes	No	7	Mild	361940	2584	75	47	99.9
269	Yes	GB-063	GB-063	OX02-8271-V01	SAMEA8910935	ERS6593820	MZ515749	Infant case-control	4	NovaSeq 6000	A	Infant	>=6 mo	Male	United Kingdom	Oxford	19-20	2019/11/09	2019/11/13	4	No	No	5	Mild	4794794	111626	97	1998	100
270	No	GB-064	GB-064	OX02-8285-V01	SAMEA8911127	ERS6594012	NA	Infant case-control	4	NovaSeq 6000	A	Infant	<3 mo	Male	United Kingdom	Oxford	19-20	2019/11/02	2019/11/04	2	Yes	No	8	Moderate	334695	232	71	4	51.4
271	Yes	GB-065	GB-065	OX02-8299-V01	SAMEA8910951	ERS6593836	MZ515910	Infant case-control	4	NovaSeq 6000	A	Infant	>=6 mo	Female	United Kingdom	Oxford	19-20	2019/11/11	2019/11/13	2	No	NA	NA	NA	14943903	215991	98	3383	100
272	Yes	GB-066	GB-066-01	OX02-8301-V01	SAMEA8910716	ERS6593601	MZ516051	Infant case-control	2	NovaSeq 6000	B	Infant	3 to <6 mo	Male	United Kingdom	Oxford	18-19	2018/11/10	2018/11/14	4	Yes	No	10	Moderate	7832167	244322	96	3778	100
273	Yes	GB-066	GB-066-02	OX02-8301-D02	SAMEA8910675	ERS6593560	MZ515596	Infant case-control	2	NovaSeq 6000	B	Infant	3 to <6 mo	Male	United Kingdom	Oxford	18-19	2018/11/10	2018/11/15	5	Yes	No	10	Moderate	6292961	228802	96	3473	100
274	Yes	GB-066	GB-066-03	OX02-8301-D03	SAMEA8910505	ERS6593390	MZ515767	Infant case-control	2	NovaSeq 6000	B	Infant	3 to <6 mo	Male	United Kingdom	Oxford	18-19	2018/11/10	2018/11/16	6	Yes	No	10	Moderate	918202	18345	91	331	100
275	No	GB-067	GB-067	OX02-8303-V01	SAMEA8910491	ERS6593376	NA	Infant case-control	2	NovaSeq 6000	A/B	Infant	>=6 mo	Male	United Kingdom	Oxford	18-19	2018/11/18	2018/11/23	5	Yes	No	7	Mild	1474405	44777	94	799	100
276	Yes	GB-068	GB-068-01	OX02-8304-V01	SAMEA8910626	ERS6593511	MZ515820	Infant case-control	2	NovaSeq 6000	B	Infant	3 to <6 mo	Male	United Kingdom	Oxford	18-19	2018/11/14	2018/11/19	5	Yes	No	11	Moderate	990616	32257	88	588	100
277	No	GB-068	GB-068-02	OX02-8304-D02	SAMEA8910743	ERS6593628	MZ516037	Infant case-control	2	NovaSeq 6000	B	Infant	3 to <6 mo	Male	United Kingdom	Oxford	18-19	2018/11/14	2018/11/20	6	Yes	No	11	Moderate	98717	4533	85	84	100
278	No	GB-068	GB-068-03	OX02-8304-D03	SAMEA8910565	ERS6593450	MZ515936	Infant case-control	2	NovaSeq 6000	B	Infant	3 to <6 mo	Male	United Kingdom	Oxford	18-19	2018/11/14	2018/11/21	7	Yes	No	11	Moderate	661040	7203	90	130	99.9
279	No	GB-068	GB-068-04	OX02-8304-D04	SAMEA8910541	ERS6593426	MZ516125	Infant case-control	2	NovaSeq 6000	B	Infant	3 to <6 mo	Male	United Kingdom	Oxford	18-19	2018/11/14	2018/11/22	8	Yes	No	11	Moderate	517223	4952	87	89	100
280	No	GB-068	GB-068-05	OX02-8304-D05	SAMEA8910601	ERS6593486	NA	Infant case-control	2	NovaSeq 6000	B	Infant	3 to <6 mo	Male	United Kingdom	Oxford	18-19	2018/11/14	2018/11/23	9	Yes	No	11	Moderate	467541	31	78	1	11.4
281	Yes	GB-069	GB-069-01	OX02-8313-V01	SAMEA8910410	ERS6593296	MZ515779	Infant case-control	2	NovaSeq 6000	B	Infant	>=6 mo	Male	United Kingdom	Oxford	18-19	2018/11/16	2018/11/20	4	Yes	Yes	17	Severe	645969	13821	93	251	100
282	Yes	GB-069	GB-069-02	OX02-8313-D02	SAMEA8910559	ERS6593444	MZ515759	Infant case-control	2	NovaSeq 6000	B	Infant	>=6 mo	Male	United Kingdom	Oxford	18-19	2018/11/16	2018/11/21	5	Yes	Yes	17	Severe	465331	13650	92	245	100
283	No	GB-069	GB-069-03	OX02-8313-D03	SAMEA8910650	ERS6593535	MZ515900	Infant case-control	2	NovaSeq 6000	B	Infant	>=6 mo	Male	United Kingdom	Oxford	18-19	2018/11/16	2018/11/22	6	Yes	Yes	17	Severe	211974	1558	79	28	97.5
284	No	GB-069	GB-069-04	OX02-8313-D04	SAMEA8910715	ERS6593600	MZ515937	Infant case-control	2	NovaSeq 6000	B	Infant	>=6 mo	Male	United Kingdom	Oxford	18-19	2018/11/16	2018/11/23	7	Yes	Yes	17	Severe	268035	2399	80	44	99.7
285	No	GB-069	GB-069-07	OX02-8313-D07	SAMEA8910585	ERS6593470	NA	Infant case-control	2	NovaSeq 6000	B	Infant	>=6 mo	Male	United Kingdom	Oxford	18-19	2018/11/16	2018/11/26	10	Yes	Yes	17	Severe	358363	42	85	1	16.2
286	No	GB-069	GB-069-08	OX02-8313-D08	SAMEA8910486	ERS6593371	NA	Infant case-control	2	NovaSeq 6000	B	Infant	>=6 mo	Male	United Kingdom	Oxford	18-19	2018/11/16	2018/11/27	11	Yes	Yes	17	Severe	358166	NA	NA	NA	NA
287	No	GB-069	GB-069-09	OX02-8313-D09	SAMEA8910424	ERS6593309	NA	Infant case-control	2	NovaSeq 6000	B	Infant	>=6 mo	Male	United Kingdom	Oxford	18-19	2018/11/16	2018/11/28	12	Yes	Yes	17	Severe	294645	6	84	0	0.8
288	No	GB-069	GB-069-10	OX02-8313-D10	SAMEA8910519	ERS6593404	NA	Infant case-control	2	NovaSeq 6000	B	Infant	>=6 mo	Male	United Kingdom	Oxford	18-19	2018/11/16	2018/11/29	13	Yes	Yes	17	Severe	1184807	112	85	2	39.9
289	No	GB-069	GB-069-11	OX02-8313-D11	SAMEA8910669	ERS6593554	NA	Infant case-control	2	NovaSeq 6000	B	Infant	>=6 mo	Male	United Kingdom	Oxford	18-19	2018/11/16	2018/11/30	14	Yes	Yes	17	Severe	607093	NA	NA	NA	NA
290	No	GB-069	GB-069-14	OX02-8313-D14	SAMEA8910417	ERS6593303	NA	Infant case-control	2	NovaSeq 6000	B	Infant	>=6 mo	Male	United Kingdom	Oxford	18-19	2018/11/16	2018/12/03	17	Yes	Yes	17	Severe	764509	NA	NA	NA	NA
291	No	GB-069	GB-069-15	OX02-8313-D15	SAMEA8910583	ERS6593468	NA	Infant case-control	2	NovaSeq 6000	B	Infant	>=6 mo	Male	United Kingdom	Oxford	18-19	2018/11/16	2018/12/04	18	Yes	Yes	17	Severe	337771	NA	NA	NA	NA
292	No	GB-069	GB-069-16	OX02-8313-D16	SAMEA8910591	ERS6593476	NA	Infant case-control	2	NovaSeq 6000	B	Infant	>=6 mo	Male	United Kingdom	Oxford	18-19	2018/11/16	2018/12/05	19	Yes	Yes	17	Severe	225617	NA	NA	NA	NA
293	No	GB-070	GB-070	OX02-8323-V01	SAMEA8910730	ERS6593615	MZ515966	Infant case-control	2	NovaSeq 6000	A	Infant	>=6 mo	Male	United Kingdom	Oxford	18-19	2018/11/18	2018/11/22	4	Yes	No	3	Mild	433470	9652	85	177	100
294	No	GB-071	GB-071	OX02-8327-V01	SAMEA8910663	ERS6593548	MZ515584	Infant case-control	2	NovaSeq 6000	B	Infant	3 to <6 mo	Male	United Kingdom	Oxford	18-19	2018/11/16	2018/11/21	5	No	No	3	Mild	664639	4543	81	83	100
295	Yes	GB-072	GB-072	OX02-8342-V01	SAMEA8910587	ERS6593472	MZ516065	Infant case-control	2	NovaSeq 6000	B	Infant	>=6 mo	Female	United Kingdom	Oxford	18-19	2018/11/24	2018/11/28	4	No	NA	NA	NA	7497989	288676	95	4120	100
296	No	GB-073	GB-073-01	OX02-8345-V01	SAMEA8910569	ERS6593454	MZ515763	Infant case-control	2	NovaSeq 6000	B	Infant	>=6 mo	Male	United Kingdom	Oxford	18-19	2018/11/25	2018/11/29	4	Yes	Yes	11	Moderate	356167	547	87	10	86.6
297	No	GB-073	GB-073-02	OX02-8345-D02	SAMEA8910562	ERS6593447	MZ515747	Infant case-control	2	NovaSeq 6000	B	Infant	>=6 mo	Male	United Kingdom	Oxford	18-19	2018/11/25	2018/11/30	5	Yes	Yes	11	Moderate	530447	1165	85	21	96.3
298	No	GB-074	GB-074	OX02-8349-V01	SAMEA8911172	ERS6594056	MZ515829	Infant case-control	4	NovaSeq 6000	B	Infant	<3 mo	Male	United Kingdom	Oxford	19-20	2019/11/04	2019/11/06	2	No	No	4	Mild	259841	491	73	9	93
299	Yes	GB-075	GB-075	OX02-8371-V01	SAMEA8910428	ERS6593313	MZ515929	Infant case-control	2	NovaSeq 6000	A	Infant	3 to <6 mo	Female	United Kingdom	Oxford	18-19	2018/12/11	2018/12/13	2	No	No	6	Mild	1728337	58732	94	1055	100
300	Yes	GB-076	GB-076-01	OX02-8372-V01	SAMEA8910737	ERS6593622	MZ516107	Infant case-control	2	NovaSeq 6000	B	Infant	3 to <6 mo	Female	United Kingdom	Oxford	18-19	2018/11/24	2018/11/28	4	Yes	No	12	Moderate	1931556	70676	88	1277	100
301	Yes	GB-076	GB-076-02	OX02-8372-D02	SAMEA8910575	ERS6593460	MZ515694	Infant case-control	2	NovaSeq 6000	B	Infant	3 to <6 mo	Female	United Kingdom	Oxford	18-19	2018/11/24	2018/11/29	5	Yes	No	12	Moderate	409000	12375	87	222	100
302	No	GB-077	GB-077-01	OX02-8377-V01	SAMEA8910435	ERS6593320	MZ515876	Infant case-control	2	NovaSeq 6000	A	Infant	<3 mo	Female	United Kingdom	Oxford	18-19	2018/11/19	2018/11/23	4	Yes	No	18	Severe	232697	699	82	12	83.6
303	No	GB-077	GB-077-04	OX02-8377-D04	SAMEA8910749	ERS6593634	NA	Infant case-control	2	NovaSeq 6000	A	Infant	<3 mo	Female	United Kingdom	Oxford	18-19	2018/11/19	2018/11/26	7	Yes	No	18	Severe	273821	NA	NA	NA	NA
304	No	GB-077	GB-077-05	OX02-8377-D05	SAMEA8910618	ERS6593503	NA	Infant case-control	2	NovaSeq 6000	A	Infant	<3 mo	Female	United Kingdom	Oxford	18-19	2018/11/19	2018/11/27	8	Yes	No	18	Severe	171042	261	73	5	66.9
305	No	GB-077	GB-077-06	OX02-8377-D06	SAMEA8910443	ERS6593328	NA	Infant case-control	2	NovaSeq 6000	A	Infant	<3 mo	Female	United Kingdom	Oxford	18-19	2018/11/19	2018/11/28	9	Yes	No	18	Severe	255006	29	86	1	12.5
306	No	GB-077	GB-077-07	OX02-8377-D07	SAMEA8910516	ERS6593401	NA	Infant case-control	2	NovaSeq 6000	A	Infant	<3 mo	Female	United Kingdom	Oxford	18-19	2018/11/19	2018/11/29	10	Yes	No	18	Severe	184594	26	81	0	9.4
307	No	GB-077	GB-077-08	OX02-8377-D08	SAMEA8910660	ERS6593545	NA	Infant case-control	2	NovaSeq 6000	A	Infant	<3 mo	Female	United Kingdom	Oxford	18-19	2018/11/19	2018/11/30	11	Yes	No	18	Severe	168112	4	83	0	1.7
308	Yes	GB-078	GB-078-01	OX02-8382-V01	SAMEA8910620	ERS6593505	MZ515647	Infant case-control	2	NovaSeq 6000	A	Infant	<3 mo	Male	United Kingdom	Oxford	18-19	2018/11/17	2018/11/20	3	Yes	No	5	Mild	1471155	65665	93	1166	100
309	Yes	GB-078	GB-078-02	OX02-8382-D02	SAMEA8910510	ERS6593395	MZ515964	Infant case-control	2	NovaSeq 6000	A	Infant	<3 mo	Male	United Kingdom	Oxford	18-19	2018/11/17	2018/11/21	4	Yes	No	5	Mild	939335	16887	95	303	100
310	No	GB-078	GB-078-03	OX02-8382-D03	SAMEA8910579	ERS6593464	MZ516001	Infant case-control	2	NovaSeq 6000	A	Infant	<3 mo	Male	United Kingdom	Oxford	18-19	2018/11/17	2018/11/22	5	Yes	No	5	Mild	423796	1097	91	20	77.4
311	Yes	GB-079	GB-079-01	OX02-8385-V01	SAMEA8910544	ERS6593429	MZ515807	Infant case-control	2	NovaSeq 6000	B	Infant	<3 mo	Female	United Kingdom	Oxford	18-19	2018/11/01	2018/11/06	5	Yes	No	10	Moderate	2135908	16579	89	299	100
312	No	GB-079	GB-079-02	OX02-8385-D02	SAMEA8910543	ERS6593428	NA	Infant case-control	2	NovaSeq 6000	B	Infant	<3 mo	Female	United Kingdom	Oxford	18-19	2018/11/01	2018/11/07	6	Yes	No	10	Moderate	1052238	149	88	3	54.2
313	No	GB-079	GB-079-03	OX02-8385-D03	SAMEA8910596	ERS6593481	NA	Infant case-control	2	NovaSeq 6000	B	Infant	<3 mo	Female	United Kingdom	Oxford	18-19	2018/11/01	2018/11/08	7	Yes	No	10	Moderate	216394	NA	NA	NA	NA
314	Yes	GB-080	GB-080-01	OX02-8390-V01	SAMEA8910763	ERS6593648	MZ516008	Infant case-control	2	NovaSeq 6000	A	Infant	>=6 mo	Male	United Kingdom	Oxford	18-19	2018/11/09	2018/11/14	5	Yes	No	9	Moderate	1575381	72222	93	1304	100
315	Yes	GB-080	GB-080-02	OX02-8390-D02	SAMEA8910637	ERS6593522	MZ515948	Infant case-control	2	NovaSeq 6000	A	Infant	>=6 mo	Male	United Kingdom	Oxford	18-19	2018/11/09	2018/11/15	6	Yes	No	9	Moderate	2073531	62417	96	1121	100
316	No	GB-080	GB-080-03	OX02-8390-D03	SAMEA8911181	ERS6594065	MZ515874	Infant case-control	4	NovaSeq 6000	A	Infant	>=6 mo	Male	United Kingdom	Oxford	18-19	2018/11/09	2018/11/16	7	Yes	No	9	Moderate	397682	2124	83	39	88.8
317	Yes	GB-081	GB-081	OX02-8402-V01	SAMEA8910427	ERS6593312	MZ515672	Infant case-control	2	NovaSeq 6000	B	Infant	<3 mo	Male	United Kingdom	Oxford	18-19	2019/01/12	2019/01/17	5	Yes	Yes	10	Moderate	694444	30192	90	541	100
318	Yes	GB-082	GB-082-01	OX02-8433-V01	SAMEA8910671	ERS6593556	MZ515989	Infant case-control	2	NovaSeq 6000	A	Infant	>=6 mo	Male	United Kingdom	Oxford	18-19	2018/11/10	2018/11/13	3	Yes	Yes	8	Moderate	902435	73687	89	1342	100
319	Yes	GB-082	GB-082-02	OX02-8433-D02	SAMEA8910396	ERS6593282	MZ515685	Infant case-control	2	NovaSeq 6000	A	Infant	>=6 mo	Male	United Kingdom	Oxford	18-19	2018/11/10	2018/11/14	4	Yes	Yes	8	Moderate	23151313	357134	98	4162	100
320	Yes	GB-082	GB-082-03	OX02-8433-D03	SAMEA8910640	ERS6593525	MZ516093	Infant case-control	2	NovaSeq 6000	A	Infant	>=6 mo	Male	United Kingdom	Oxford	18-19	2018/11/10	2018/11/15	5	Yes	Yes	8	Moderate	305086	17082	85	310	100
321	No	GB-082	GB-082-04	OX02-8433-D04	SAMEA8910713	ERS6593598	MZ516074	Infant case-control	2	NovaSeq 6000	A	Infant	>=6 mo	Male	United Kingdom	Oxford	18-19	2018/11/10	2018/11/16	6	Yes	Yes	8	Moderate	1651151	7475	82	137	100
322	Yes	GB-083	GB-083	OX02-8437-V01	SAMEA8910437	ERS6593322	MZ515921	Infant case-control	2	NovaSeq 6000	A	Infant	<3 mo	Male	United Kingdom	Oxford	18-19	2018/12/08	2018/12/13	5	Yes	No	8	Moderate	2292605	35340	91	633	100
323	Yes	GB-084	GB-084	OX02-8438-V01	SAMEA8910964	ERS6593849	MZ515645	Infant case-control	4	NovaSeq 6000	A	Infant	>=6 mo	Female	United Kingdom	Oxford	19-20	2019/11/09	2019/11/12	3	No	No	1	Mild	2548310	108684	95	1951	100
324	No	GB-085	GB-085	OX02-8448-V01	SAMEA8910714	ERS6593599	MZ515788	Infant case-control	2	NovaSeq 6000	A	Infant	>=6 mo	Female	United Kingdom	Oxford	18-19	2018/11/19	2018/11/22	3	Yes	Yes	7	Mild	291552	468	82	9	89
325	No	GB-086	GB-086	OX02-8459-V01	SAMEA8911191	ERS6594075	MZ515765	Infant case-control	4	NovaSeq 6000	B	Infant	3 to <6 mo	Female	United Kingdom	Oxford	19-20	2019/11/29	2019/12/02	3	No	No	2	Mild	659033	833	71	15	95.2
326	Yes	GB-087	GB-087-01	OX02-8474-V01	SAMEA8910740	ERS6593625	MZ516076	Infant case-control	2	NovaSeq 6000	A	Infant	3 to <6 mo	Male	United Kingdom	Oxford	18-19	2018/12/01	2018/12/04	3	Yes	No	15	Severe	1217306	45065	95	810	100
327	No	GB-087	GB-087-02	OX02-8474-D02	SAMEA8910625	ERS6593510	MZ515980	Infant case-control	2	NovaSeq 6000	A	Infant	3 to <6 mo	Male	United Kingdom	Oxford	18-19	2018/12/01	2018/12/05	4	Yes	No	15	Severe	240006	2643	83	48	99.6
328	No	GB-087	GB-087-03	OX02-8474-D03	SAMEA8910572	ERS6593457	MZ516046	Infant case-control	2	NovaSeq 6000	A	Infant	3 to <6 mo	Male	United Kingdom	Oxford	18-19	2018/12/01	2018/12/06	5	Yes	No	15	Severe	207458	2094	86	38	98.4
329	No	GB-087	GB-087-04	OX02-8474-D04	SAMEA8910536	ERS6593421	MZ515621	Infant case-control	2	NovaSeq 6000	A	Infant	3 to <6 mo	Male	United Kingdom	Oxford	18-19	2018/12/01	2018/12/07	6	Yes	No	15	Severe	230232	1012	85	18	94
330	No	GB-088	GB-088-01	OX02-8478-V01	SAMEA8910421	ERS6593306	NA	Infant case-control	2	NovaSeq 6000	B	Infant	<3 mo	Female	United Kingdom	Oxford	18-19	2018/11/24	2018/11/29	5	Yes	No	15	Severe	400426	127	84	2	38.7
331	No	GB-088	GB-088-02	OX02-8478-D02	SAMEA8910408	ERS6593294	NA	Infant case-control	2	NovaSeq 6000	B	Infant	<3 mo	Female	United Kingdom	Oxford	18-19	2018/11/24	2018/11/30	6	Yes	No	15	Severe	347697	320	86	6	64.6
332	Yes	GB-089	GB-089	OX02-8492-V01	SAMEA8910504	ERS6593389	MZ515689	Infant case-control	2	NovaSeq 6000	A	Infant	<3 mo	Male	United Kingdom	Oxford	18-19	2018/12/15	2018/12/19	4	Yes	Yes	9	Moderate	6210423	122802	98	2099	100
333	Yes	GB-090	GB-090-01	OX02-8497-V01	SAMEA8910524	ERS6593409	MZ515909	Infant case-control	2	NovaSeq 6000	A	Infant	<3 mo	Female	United Kingdom	Oxford	18-19	2018/12/13	2018/12/18	5	Yes	No	4	Mild	1232869	22273	91	399	100
334	No	GB-090	GB-090-02	OX02-8497-D02	SAMEA8910648	ERS6593533	MZ515999	Infant case-control	2	NovaSeq 6000	A	Infant	<3 mo	Female	United Kingdom	Oxford	18-19	2018/12/13	2018/12/19	6	Yes	No	4	Mild	908006	2573	82	47	99.6
335	No	GB-090	GB-090-03	OX02-8497-D03	SAMEA8910403	ERS6593289	MZ516085	Infant case-control	2	NovaSeq 6000	A	Infant	<3 mo	Female	United Kingdom	Oxford	18-19	2018/12/13	2018/12/20	7	Yes	No	4	Mild	643886	2494	88	45	97.9
336	No	GB-090	GB-090-04	OX02-8497-D04	SAMEA8910522	ERS6593407	NA	Infant case-control	2	NovaSeq 6000	A	Infant	<3 mo	Female	United Kingdom	Oxford	18-19	2018/12/13	2018/12/21	8	Yes	No	4	Mild	464830	220	86	4	55.8
337	Yes	GB-091	GB-091	OX02-8504-V01	SAMEA8910678	ERS6593563	MZ516028	Infant case-control	2	NovaSeq 6000	A	Infant	3 to <6 mo	Male	United Kingdom	Oxford	18-19	2018/12/01	2018/12/06	5	Yes	No	3	Mild	708467	46882	90	856	100
338	No	GB-092	GB-092-01	OX02-8513-V01	SAMEA8910533	ERS6593418	MZ515602	Infant case-control	2	NovaSeq 6000	A	Infant	>=6 mo	Male	United Kingdom	Oxford	18-19	2018/11/07	2018/11/13	6	Yes	Yes	13	Moderate	396228	929	88	17	86.5
339	No	GB-092	GB-092-02	OX02-8513-D02	SAMEA8910498	ERS6593383	MZ515951	Infant case-control	2	NovaSeq 6000	A	Infant	>=6 mo	Male	United Kingdom	Oxford	18-19	2018/11/07	2018/11/14	7	Yes	Yes	13	Moderate	1125408	6681	88	121	100
340	No	GB-092	GB-092-03	OX02-8513-D03	SAMEA8910452	ERS6593337	MZ515880	Infant case-control	2	NovaSeq 6000	A	Infant	>=6 mo	Male	United Kingdom	Oxford	18-19	2018/11/07	2018/11/15	8	Yes	Yes	13	Moderate	3501462	5174	90	93	100
341	No	GB-092	GB-092-04	OX02-8513-D04	SAMEA8910731	ERS6593616	MZ516127	Infant case-control	2	NovaSeq 6000	A	Infant	>=6 mo	Male	United Kingdom	Oxford	18-19	2018/11/07	2018/11/16	9	Yes	Yes	13	Moderate	485934	438	81	8	87.6
342	No	GB-092	GB-092-07	OX02-8513-D07	SAMEA8910440	ERS6593325	NA	Infant case-control	2	NovaSeq 6000	A	Infant	>=6 mo	Male	United Kingdom	Oxford	18-19	2018/11/07	2018/11/19	12	Yes	Yes	13	Moderate	677875	NA	NA	NA	NA
343	No	GB-092	GB-092-08	OX02-8513-D08	SAMEA8910395	ERS6593281	NA	Infant case-control	2	NovaSeq 6000	A	Infant	>=6 mo	Male	United Kingdom	Oxford	18-19	2018/11/07	2018/11/20	13	Yes	Yes	13	Moderate	1049034	3	88	0	0
344	No	GB-092	GB-092-09	OX02-8513-D09	SAMEA8910480	ERS6593365	NA	Infant case-control	2	NovaSeq 6000	A	Infant	>=6 mo	Male	United Kingdom	Oxford	18-19	2018/11/07	2018/11/21	14	Yes	Yes	13	Moderate	2258671	NA	NA	NA	NA
345	Yes	GB-093	GB-093	OX02-8516-V01	SAMEA8910652	ERS6593537	MZ516061	Infant case-control	2	NovaSeq 6000	B	Infant	<3 mo	Male	United Kingdom	Oxford	18-19	2018/11/02	2018/11/05	3	Yes	No	3	Mild	320015	17492	86	317	100
346	No	GB-094	GB-094	OX02-8521-V01	SAMEA8910453	ERS6593338	MZ515610	Infant case-control	2	NovaSeq 6000	B	Infant	>=6 mo	Male	United Kingdom	Oxford	18-19	2018/11/14	2018/11/16	2	Yes	No	8	Moderate	433864	396	82	7	73.8
347	No	GB-095	GB-095	OX02-8523-V01	SAMEA8911062	ERS6593947	MZ515590	Infant case-control	4	NovaSeq 6000	B	Infant	>=6 mo	Male	United Kingdom	Oxford	19-20	2019/12/02	2019/12/05	3	Yes	Yes	4	Mild	495427	3634	86	67	100
348	No	GB-096	GB-096	OX02-8539-V01	SAMEA8910631	ERS6593516	MZ515727	Infant case-control	2	NovaSeq 6000	B	Infant	<3 mo	Male	United Kingdom	Oxford	18-19	2018/11/23	2018/11/26	3	Yes	No	3	Mild	244086	1671	76	30	99.5
349	Yes	GB-097	GB-097	OX02-8541-V01	SAMEA8911067	ERS6593952	MZ516102	Infant case-control	4	NovaSeq 6000	B	Infant	3 to <6 mo	Female	United Kingdom	Oxford	19-20	2019/12/07	2019/12/10	3	No	No	5	Mild	1748785	48804	95	898	100
350	No	GB-098	GB-098-01	OX02-8554-V01	SAMEA8910535	ERS6593420	MZ515593	Infant case-control	2	NovaSeq 6000	A	Infant	3 to <6 mo	Male	United Kingdom	Oxford	18-19	2018/11/26	2018/12/01	5	Yes	Yes	12	Moderate	847770	3456	89	62	99.4
351	No	GB-098	GB-098-02	OX02-8554-D02	SAMEA8910722	ERS6593607	MZ515861	Infant case-control	2	NovaSeq 6000	A	Infant	3 to <6 mo	Male	United Kingdom	Oxford	18-19	2018/11/26	2018/12/02	6	Yes	Yes	12	Moderate	1332782	4952	88	91	99.8
352	No	GB-098	GB-098-03	OX02-8554-D03	SAMEA8910610	ERS6593495	MZ515897	Infant case-control	2	NovaSeq 6000	A	Infant	3 to <6 mo	Male	United Kingdom	Oxford	18-19	2018/11/26	2018/12/03	7	Yes	Yes	12	Moderate	1123953	1470	80	27	97.7
353	Yes	GB-099	GB-099-01	OX02-8566-V01	SAMEA8910502	ERS6593387	MZ515617	Infant case-control	2	NovaSeq 6000	A	Infant	>=6 mo	Male	United Kingdom	Oxford	18-19	2018/11/10	2018/11/13	3	Yes	No	10	Moderate	6457690	88065	93	1563	100
354	Yes	GB-099	GB-099-02	OX02-8566-D02	SAMEA8910647	ERS6593532	MZ515954	Infant case-control	2	NovaSeq 6000	A	Infant	>=6 mo	Male	United Kingdom	Oxford	18-19	2018/11/10	2018/11/14	4	Yes	No	10	Moderate	805201	16317	87	297	100
355	Yes	GB-099	GB-099-03	OX02-8566-D03	SAMEA8910719	ERS6593604	MZ516067	Infant case-control	2	NovaSeq 6000	A	Infant	>=6 mo	Male	United Kingdom	Oxford	18-19	2018/11/10	2018/11/15	5	Yes	No	10	Moderate	2804190	36862	90	668	100
356	No	GB-099	GB-099-04	OX02-8566-D04	SAMEA8910547	ERS6593432	MZ516063	Infant case-control	2	NovaSeq 6000	A	Infant	>=6 mo	Male	United Kingdom	Oxford	18-19	2018/11/10	2018/11/16	6	Yes	No	10	Moderate	1051423	3984	88	72	100
357	Yes	GB-100	GB-100-01	OX02-8567-V01	SAMEA8910592	ERS6593477	MZ515671	Infant case-control	2	NovaSeq 6000	B	Infant	>=6 mo	Male	United Kingdom	Oxford	18-19	2018/10/21	2018/10/24	3	Yes	No	8	Moderate	4479502	162906	96	2746	100
358	Yes	GB-100	GB-100-02	OX02-8567-D02	SAMEA8910581	ERS6593466	MZ515844	Infant case-control	2	NovaSeq 6000	B	Infant	>=6 mo	Male	United Kingdom	Oxford	18-19	2018/10/21	2018/10/25	4	Yes	No	8	Moderate	593575	21658	91	390	100
359	Yes	GB-101	GB-101-01	OX02-8575-D01	SAMEA5870286	ERS3658774	LR699734	Infant case-control	1	MiSeq	A	Infant	3 to <6 mo	Female	United Kingdom	Oxford	17-18	2018/01/15	2018/01/18	3	Yes	No	13	Moderate	994215	73289	82	1651	100
360	No	GB-101	GB-101-02	OX02-8575-D02	SAMEA8910638	ERS6593523	MZ516019	Infant case-control	2	NovaSeq 6000	A	Infant	3 to <6 mo	Female	United Kingdom	Oxford	17-18	2018/01/15	2018/01/19	4	Yes	No	13	Moderate	1192081	1901	81	34	98.5
361	No	GB-102	GB-102	OX02-8584-V01	SAMEA8911211	ERS6594095	MZ516129	Infant case-control	4	NovaSeq 6000	A	Infant	>=6 mo	Female	United Kingdom	Oxford	19-20	2019/11/04	2019/11/07	3	No	No	2	Mild	534415	9310	67	172	100
362	No	GB-103	GB-103	OX02-8587-V01	SAMEA8911092	ERS6593977	MZ515994	Infant case-control	4	NovaSeq 6000	A	Infant	>=6 mo	Female	United Kingdom	Oxford	19-20	2019/11/17	2019/11/19	2	No	No	1	Mild	649494	463	81	9	79.9
363	Yes	GB-104	GB-104-01	OX02-8608-V01	SAMEA8910461	ERS6593346	MZ515908	Infant case-control	2	NovaSeq 6000	A	Infant	3 to <6 mo	Female	United Kingdom	Oxford	18-19	2018/11/15	2018/11/20	5	Yes	Yes	7	Mild	3710622	67807	94	1203	100
364	Yes	GB-104	GB-104-02	OX02-8608-D02	SAMEA8910568	ERS6593453	MZ515755	Infant case-control	2	NovaSeq 6000	A	Infant	3 to <6 mo	Female	United Kingdom	Oxford	18-19	2018/11/15	2018/11/21	6	Yes	Yes	7	Mild	768356	13618	89	247	100
365	Yes	GB-105	GB-105	OX02-8620-V01	SAMEA8910447	ERS6593332	MZ515812	Infant case-control	2	NovaSeq 6000	B	Infant	<3 mo	Female	United Kingdom	Oxford	18-19	2018/12/02	2018/12/04	2	Yes	No	7	Mild	418589	38320	80	688	100
366	Yes	GB-106	GB-106	OX02-8635-V01	SAMEA8910742	ERS6593627	MZ515782	Infant case-control	2	NovaSeq 6000	A	Infant	>=6 mo	Male	United Kingdom	Oxford	18-19	2018/12/17	2018/12/20	3	Yes	No	6	Mild	2686179	127270	94	2223	100
367	Yes	GB-107	GB-107-01	OX02-8639-V01	SAMEA8910898	ERS6593783	MZ515834	Infant case-control	4	NovaSeq 6000	A	Infant	3 to <6 mo	Female	United Kingdom	Oxford	19-20	2019/11/18	2019/11/21	3	Yes	No	5	Mild	1123189	18458	79	335	100
368	No	GB-107	GB-107-02	OX02-8639-D02	SAMEA8911133	ERS6594018	NA	Infant case-control	4	NovaSeq 6000	A	Infant	3 to <6 mo	Female	United Kingdom	Oxford	19-20	2019/11/18	2019/11/22	4	Yes	No	5	Mild	311546	423	77	8	55.1
369	Yes	GB-108	GB-108-01	OX02-8663-V01	SAMEA8910599	ERS6593484	MZ515819	Infant case-control	2	NovaSeq 6000	A	Infant	>=6 mo	Female	United Kingdom	Oxford	18-19	2018/10/19	2018/10/22	3	Yes	Yes	10	Moderate	5977836	179639	96	2956	100
370	Yes	GB-108	GB-108-02	OX02-8663-D02	SAMEA8910751	ERS6593636	MZ515922	Infant case-control	2	NovaSeq 6000	A	Infant	>=6 mo	Female	United Kingdom	Oxford	18-19	2018/10/19	2018/10/23	4	Yes	Yes	10	Moderate	8185788	238361	97	3421	100
371	Yes	GB-108	GB-108-03	OX02-8663-D03	SAMEA8910496	ERS6593381	MZ515853	Infant case-control	2	NovaSeq 6000	A	Infant	>=6 mo	Female	United Kingdom	Oxford	18-19	2018/10/19	2018/10/24	5	Yes	Yes	10	Moderate	1708270	83732	93	1506	100
372	Yes	GB-108	GB-108-04	OX02-8663-D04	SAMEA8910553	ERS6593438	MZ515870	Infant case-control	2	NovaSeq 6000	A	Infant	>=6 mo	Female	United Kingdom	Oxford	18-19	2018/10/19	2018/10/25	6	Yes	Yes	10	Moderate	754863	20954	90	374	100
373	No	GB-108	GB-108-05	OX02-8663-D05	SAMEA8910664	ERS6593549	MZ515739	Infant case-control	2	NovaSeq 6000	A	Infant	>=6 mo	Female	United Kingdom	Oxford	18-19	2018/10/19	2018/10/26	7	Yes	Yes	10	Moderate	656465	706	80	13	74.1
374	Yes	GB-109	GB-109-01	OX02-8669-D01	SAMEA5870287	ERS3658775	NA	Infant case-control	1	MiSeq	B	Infant	3 to <6 mo	Female	United Kingdom	Oxford	17-18	2017/12/11	2017/12/20	9	Yes	Yes	14	Severe	2194241	242897	78	4656	100
375	No	GB-109	GB-109-03	OX02-8669-D03	SAMEA8910674	ERS6593559	MZ515742	Infant case-control	2	NovaSeq 6000	B	Infant	3 to <6 mo	Female	United Kingdom	Oxford	17-18	2017/12/11	2017/12/22	11	Yes	Yes	14	Severe	205683	1065	77	19	92.9
376	Yes	GB-110	GB-110	OX02-8703-V01	SAMEA8911074	ERS6593959	MZ515723	Infant case-control	4	NovaSeq 6000	A	Infant	3 to <6 mo	Male	United Kingdom	Oxford	19-20	2019/11/18	2019/11/21	3	No	No	3	Mild	332636	10653	79	197	100
377	Yes	GB-111	GB-111-01	OX02-8710-V01	SAMEA8910727	ERS6593612	MZ515627	Infant case-control	2	NovaSeq 6000	B	Infant	>=6 mo	Male	United Kingdom	Oxford	18-19	2018/10/21	2018/10/25	4	Yes	No	6	Mild	2522962	57005	91	1038	100
378	Yes	GB-111	GB-111-02	OX02-8710-D02	SAMEA8910431	ERS6593316	MZ515890	Infant case-control	2	NovaSeq 6000	B	Infant	>=6 mo	Male	United Kingdom	Oxford	18-19	2018/10/21	2018/10/26	5	Yes	No	6	Mild	1501568	17668	89	316	100
379	Yes	GB-112	GB-112-01	OX02-8711-D01	SAMEA5870288	ERS3658776	LR699736	Infant case-control	1	MiSeq	A	Infant	<3 mo	Female	United Kingdom	Oxford	17-18	2018/01/04	2018/01/08	4	Yes	No	11	Moderate	5368901	294336	91	4795	100
380	No	GB-112	GB-112-02	OX02-8711-D02	SAMEA8910426	ERS6593311	MZ515623	Infant case-control	2	NovaSeq 6000	A	Infant	<3 mo	Female	United Kingdom	Oxford	17-18	2018/01/04	2018/01/09	5	Yes	No	11	Moderate	531566	8840	90	158	100
381	No	GB-112	GB-112-03	OX02-8711-D03	SAMEA8910455	ERS6593340	MZ516009	Infant case-control	2	NovaSeq 6000	A	Infant	<3 mo	Female	United Kingdom	Oxford	17-18	2018/01/04	2018/01/10	6	Yes	No	11	Moderate	541595	1432	87	26	93.1
382	Yes	GB-113	GB-113	OX02-8714-V01	SAMEA8910907	ERS6593792	MZ516139	Infant case-control	4	NovaSeq 6000	B	Infant	>=6 mo	Female	United Kingdom	Oxford	19-20	2019/11/18	2019/11/19	1	No	No	3	Mild	2095339	152012	89	2688	100
383	No	GB-114	GB-114	OX02-8720-V01	SAMEA8911052	ERS6593937	MZ515577	Infant case-control	4	NovaSeq 6000	A	Infant	>=6 mo	Male	United Kingdom	Oxford	19-20	2020/01/06	2020/01/09	3	No	Yes	4	Mild	1645195	1019	71	19	98.6
384	Yes	GB-115	GB-115	OX02-8725-V01	SAMEA8910929	ERS6593814	MZ515839	Infant case-control	4	NovaSeq 6000	B	Infant	NA	NA	United Kingdom	Oxford	19-20	NA	2019/11/25	NA	NA	NA	NA	NA	818485	44369	88	810	100
385	No	GB-116	GB-116-01	OX02-8739-V01	SAMEA8910436	ERS6593321	MZ515557	Infant case-control	2	NovaSeq 6000	B	Infant	<3 mo	Male	United Kingdom	Oxford	18-19	2018/11/25	2018/11/27	2	Yes	No	12	Moderate	405361	3569	88	64	100
386	No	GB-116	GB-116-02	OX02-8739-D02	SAMEA8910632	ERS6593517	NA	Infant case-control	2	NovaSeq 6000	B	Infant	<3 mo	Male	United Kingdom	Oxford	18-19	2018/11/25	2018/11/28	3	Yes	No	12	Moderate	263852	32	77	1	12.8
387	Yes	GB-117	GB-117	OX02-8756-V01	SAMEA8910972	ERS6593857	MZ515907	Infant case-control	4	NovaSeq 6000	A	Infant	<3 mo	Female	United Kingdom	Oxford	19-20	2019/10/24	2019/10/28	4	Yes	No	6	Mild	2493102	212851	90	3683	100
388	No	GB-118	GB-118-01	OX02-8758-V01	SAMEA8910607	ERS6593492	MZ515757	Infant case-control	2	NovaSeq 6000	B	Infant	<3 mo	Female	United Kingdom	Oxford	18-19	2018/12/12	2018/12/17	5	Yes	No	14	Severe	62701	2638	80	49	99.7
389	Yes	GB-118	GB-118-02	OX02-8758-D02	SAMEA8910636	ERS6593521	MZ515637	Infant case-control	2	NovaSeq 6000	B	Infant	<3 mo	Female	United Kingdom	Oxford	18-19	2018/12/12	2018/12/18	6	Yes	No	14	Severe	1042837	20666	84	375	100
390	No	GB-118	GB-118-03	OX02-8758-D03	SAMEA8910762	ERS6593647	MZ515981	Infant case-control	2	NovaSeq 6000	B	Infant	<3 mo	Female	United Kingdom	Oxford	18-19	2018/12/12	2018/12/19	7	Yes	No	14	Severe	301013	4158	83	75	100
391	No	GB-118	GB-118-04	OX02-8758-D04	SAMEA8910627	ERS6593512	NA	Infant case-control	2	NovaSeq 6000	B	Infant	<3 mo	Female	United Kingdom	Oxford	18-19	2018/12/12	2018/12/20	8	Yes	No	14	Severe	660725	22	76	0	6
392	No	GB-118	GB-118-05	OX02-8758-D05	SAMEA8910468	ERS6593353	NA	Infant case-control	2	NovaSeq 6000	B	Infant	<3 mo	Female	United Kingdom	Oxford	18-19	2018/12/12	2018/12/21	9	Yes	No	14	Severe	442069	50	83	1	20.9
393	Yes	GB-119	GB-119	OX02-8773-V01	SAMEA8910611	ERS6593496	MZ515652	Infant case-control	2	NovaSeq 6000	A	Infant	>=6 mo	Male	United Kingdom	Oxford	18-19	2018/12/02	2018/12/06	4	Yes	No	9	Moderate	1479016	20155	90	358	100
394	No	GB-120	GB-120	OX02-8782-V01	SAMEA8910943	ERS6593828	NA	Infant case-control	4	NovaSeq 6000	B	Infant	3 to <6 mo	Male	United Kingdom	Oxford	19-20	2019/11/05	2019/11/07	2	No	No	2	Mild	279522	110	66	2	43.3
395	No	GB-121	GB-121-01	OX02-8796-V01	SAMEA8910542	ERS6593427	MZ515846	Infant case-control	2	NovaSeq 6000	B	Infant	<3 mo	Male	United Kingdom	Oxford	18-19	2018/11/21	2018/11/26	5	Yes	No	12	Moderate	1556298	5959	87	107	100
396	No	GB-121	GB-121-02	OX02-8796-D02	SAMEA8910398	ERS6593284	MZ515979	Infant case-control	2	NovaSeq 6000	B	Infant	<3 mo	Male	United Kingdom	Oxford	18-19	2018/11/21	2018/11/27	6	Yes	No	12	Moderate	623270	3183	87	57	99.7
397	Yes	GB-122	GB-122	OX02-8806-V01	SAMEA8910993	ERS6593878	MZ516027	Infant case-control	4	NovaSeq 6000	A	Infant	>=6 mo	Female	United Kingdom	Oxford	19-20	2019/12/05	2019/12/09	4	No	Yes	1	Mild	1097518	55181	90	1008	100
398	No	GB-123	GB-123	OX02-8811-V01	SAMEA8910400	ERS6593286	MZ515551	Infant case-control	2	NovaSeq 6000	A	Infant	<3 mo	Female	United Kingdom	Oxford	18-19	2018/12/01	2018/12/06	5	Yes	No	7	Mild	452717	5545	90	100	99.4
399	Yes	GB-124	GB-124-01	OX02-8813-V01	SAMEA8910574	ERS6593459	MZ515691	Infant case-control	2	NovaSeq 6000	B	Infant	>=6 mo	Female	United Kingdom	Oxford	18-19	2018/10/21	2018/10/24	3	Yes	No	5	Mild	3413171	153651	94	2707	100
400	Yes	GB-124	GB-124-02	OX02-8813-D02	SAMEA8910512	ERS6593397	MZ516101	Infant case-control	2	NovaSeq 6000	B	Infant	>=6 mo	Female	United Kingdom	Oxford	18-19	2018/10/21	2018/10/25	4	Yes	No	5	Mild	1697765	58321	95	1053	100
401	No	GB-125	GB-125	OX02-8830-V01	SAMEA8910871	ERS6593756	MZ515769	Infant case-control	4	NovaSeq 6000	B	Infant	>=6 mo	Female	United Kingdom	Oxford	19-20	2019/11/19	2019/11/22	3	Yes	No	7	Mild	498106	9816	78	178	100
402	No	GB-126	GB-126-01	OX02-8832-V01	SAMEA8910534	ERS6593419	MZ515838	Infant case-control	2	NovaSeq 6000	B	Infant	<3 mo	Female	United Kingdom	Oxford	18-19	2018/10/27	2018/10/29	2	Yes	No	18	Severe	154605	787	86	14	74.2
403	No	GB-126	GB-126-02	OX02-8832-D02	SAMEA8910481	ERS6593366	MZ515667	Infant case-control	2	NovaSeq 6000	B	Infant	<3 mo	Female	United Kingdom	Oxford	18-19	2018/10/27	2018/10/30	3	Yes	No	18	Severe	358811	7973	87	143	100
404	No	GB-126	GB-126-03	OX02-8832-D03	SAMEA8910429	ERS6593314	MZ515916	Infant case-control	2	NovaSeq 6000	B	Infant	<3 mo	Female	United Kingdom	Oxford	18-19	2018/10/27	2018/10/31	4	Yes	No	18	Severe	339861	2446	87	44	99.9
405	No	GB-126	GB-126-04	OX02-8832-D04	SAMEA8910593	ERS6593478	MZ515894	Infant case-control	2	NovaSeq 6000	B	Infant	<3 mo	Female	United Kingdom	Oxford	18-19	2018/10/27	2018/11/01	5	Yes	No	18	Severe	317479	2047	82	37	100
406	No	GB-126	GB-126-05	OX02-8832-D05	SAMEA8910503	ERS6593388	MZ515917	Infant case-control	2	NovaSeq 6000	B	Infant	<3 mo	Female	United Kingdom	Oxford	18-19	2018/10/27	2018/11/02	6	Yes	No	18	Severe	339225	2900	87	53	100
407	No	GB-126	GB-126-06	OX02-8832-D06	SAMEA8910523	ERS6593408	MZ515589	Infant case-control	2	NovaSeq 6000	B	Infant	<3 mo	Female	United Kingdom	Oxford	18-19	2018/10/27	2018/11/03	7	Yes	No	18	Severe	329327	656	86	12	83.9
408	No	GB-126	GB-126-07	OX02-8832-D07	SAMEA8910666	ERS6593551	MZ515601	Infant case-control	2	NovaSeq 6000	B	Infant	<3 mo	Female	United Kingdom	Oxford	18-19	2018/10/27	2018/11/04	8	Yes	No	18	Severe	185899	542	77	10	93.9
409	No	GB-126	GB-126-08	OX02-8832-D08	SAMEA8910606	ERS6593491	MZ516116	Infant case-control	2	NovaSeq 6000	B	Infant	<3 mo	Female	United Kingdom	Oxford	18-19	2018/10/27	2018/11/05	9	Yes	No	18	Severe	888220	2101	82	38	100
410	No	GB-126	GB-126-09	OX02-8832-D09	SAMEA8910760	ERS6593645	NA	Infant case-control	2	NovaSeq 6000	B	Infant	<3 mo	Female	United Kingdom	Oxford	18-19	2018/10/27	2018/11/06	10	Yes	No	18	Severe	614587	169	77	3	53.3
411	No	GB-126	GB-126-10	OX02-8832-D10	SAMEA8910653	ERS6593538	NA	Infant case-control	2	NovaSeq 6000	B	Infant	<3 mo	Female	United Kingdom	Oxford	18-19	2018/10/27	2018/11/07	11	Yes	No	18	Severe	391984	NA	NA	NA	NA
412	Yes	GB-127	GB-127	OX02-8865-V01	SAMEA8910561	ERS6593446	MZ515751	Infant case-control	2	NovaSeq 6000	B	Infant	<3 mo	Male	United Kingdom	Oxford	18-19	2018/11/23	2018/11/26	3	Yes	NA	NA	NA	2166707	47814	95	867	100
413	No	GB-128	GB-128-01	OX02-8869-V01	SAMEA8910414	ERS6593300	NA	Infant case-control	2	NovaSeq 6000	B	Infant	<3 mo	Male	United Kingdom	Oxford	18-19	2018/12/04	2018/12/10	6	Yes	No	12	Moderate	556443	17	75	0	6.3
414	No	GB-128	GB-128-02	OX02-8869-D02	SAMEA8911173	ERS6594057	NA	Infant case-control	4	NovaSeq 6000	B	Infant	<3 mo	Male	United Kingdom	Oxford	18-19	2018/12/04	2018/12/11	7	Yes	No	12	Moderate	120880	117	73	2	46.2
415	No	GB-128	GB-128-03	OX02-8869-D03	SAMEA8910401	ERS6593287	NA	Infant case-control	2	NovaSeq 6000	B	Infant	<3 mo	Male	United Kingdom	Oxford	18-19	2018/12/04	2018/12/12	8	Yes	No	12	Moderate	890442	16	79	0	6.1
416	No	GB-128	GB-128-04	OX02-8869-D04	SAMEA8910597	ERS6593482	NA	Infant case-control	2	NovaSeq 6000	B	Infant	<3 mo	Male	United Kingdom	Oxford	18-19	2018/12/04	2018/12/13	9	Yes	No	12	Moderate	707639	3	88	0	0
417	No	GB-128	GB-128-05	OX02-8869-D05	SAMEA8910451	ERS6593336	NA	Infant case-control	2	NovaSeq 6000	B	Infant	<3 mo	Male	United Kingdom	Oxford	18-19	2018/12/04	2018/12/14	10	Yes	No	12	Moderate	1137566	7	78	0	3.9
418	No	GB-128	GB-128-06	OX02-8869-D06	SAMEA8910525	ERS6593410	NA	Infant case-control	2	NovaSeq 6000	B	Infant	<3 mo	Male	United Kingdom	Oxford	18-19	2018/12/04	2018/12/15	11	Yes	No	12	Moderate	429388	NA	NA	NA	NA
419	No	GB-128	GB-128-07	OX02-8869-D07	SAMEA8910538	ERS6593423	NA	Infant case-control	2	NovaSeq 6000	B	Infant	<3 mo	Male	United Kingdom	Oxford	18-19	2018/12/04	2018/12/16	12	Yes	No	12	Moderate	1266039	NA	NA	NA	NA
420	No	GB-128	GB-128-08	OX02-8869-D08	SAMEA8910567	ERS6593452	NA	Infant case-control	2	NovaSeq 6000	B	Infant	<3 mo	Male	United Kingdom	Oxford	18-19	2018/12/04	2018/12/17	13	Yes	No	12	Moderate	355414	NA	NA	NA	NA
421	No	GB-128	GB-128-09	OX02-8869-D09	SAMEA8910515	ERS6593400	NA	Infant case-control	2	NovaSeq 6000	B	Infant	<3 mo	Male	United Kingdom	Oxford	18-19	2018/12/04	2018/12/18	14	Yes	No	12	Moderate	250043	NA	NA	NA	NA
422	No	GB-128	GB-128-10	OX02-8869-D10	SAMEA8910462	ERS6593347	NA	Infant case-control	2	NovaSeq 6000	B	Infant	<3 mo	Male	United Kingdom	Oxford	18-19	2018/12/04	2018/12/19	15	Yes	No	12	Moderate	625851	NA	NA	NA	NA
423	No	GB-129	GB-129-01	OX02-8889-V01	SAMEA8910654	ERS6593539	MZ515569	Infant case-control	2	NovaSeq 6000	A	Infant	3 to <6 mo	Male	United Kingdom	Oxford	18-19	2018/11/21	2018/11/27	6	Yes	Yes	14	Severe	222167	5492	82	99	100
424	No	GB-129	GB-129-02	OX02-8889-D02	SAMEA8910449	ERS6593334	MZ515822	Infant case-control	2	NovaSeq 6000	A	Infant	3 to <6 mo	Male	United Kingdom	Oxford	18-19	2018/11/21	2018/11/28	7	Yes	Yes	14	Severe	1081246	728	87	13	90.9
425	Yes	GB-130	GB-130-01	OX02-8898-V01	SAMEA8910718	ERS6593603	MZ515707	Infant case-control	2	NovaSeq 6000	B	Infant	<3 mo	Female	United Kingdom	Oxford	18-19	2018/11/26	2018/11/30	4	Yes	No	11	Moderate	394739	11637	86	213	100
426	No	GB-130	GB-130-02	OX02-8898-D02	SAMEA8910563	ERS6593448	MZ516121	Infant case-control	2	NovaSeq 6000	B	Infant	<3 mo	Female	United Kingdom	Oxford	18-19	2018/11/26	2018/12/01	5	Yes	No	11	Moderate	342921	1637	87	29	97
427	Yes	GB-131	GB-131-01	OX02-8903-V01	SAMEA8910430	ERS6593315	MZ515678	Infant case-control	2	NovaSeq 6000	B	Infant	<3 mo	Male	United Kingdom	Oxford	18-19	2018/12/27	2019/01/02	6	Yes	Yes	16	Severe	692312	36207	91	650	100
428	Yes	GB-131	GB-131-02	OX02-8903-D02	SAMEA8910645	ERS6593530	MZ515823	Infant case-control	2	NovaSeq 6000	B	Infant	<3 mo	Male	United Kingdom	Oxford	18-19	2018/12/27	2019/01/03	7	Yes	Yes	16	Severe	349312	36457	82	664	100
429	No	GB-131	GB-131-03	OX02-8903-D03	SAMEA8910530	ERS6593415	MZ516018	Infant case-control	2	NovaSeq 6000	B	Infant	<3 mo	Male	United Kingdom	Oxford	18-19	2018/12/27	2019/01/04	8	Yes	Yes	16	Severe	290656	345	87	6	74.2
430	No	GB-131	GB-131-06	OX02-8903-D06	SAMEA8910657	ERS6593542	NA	Infant case-control	2	NovaSeq 6000	B	Infant	<3 mo	Male	United Kingdom	Oxford	18-19	2018/12/27	2019/01/07	11	Yes	Yes	16	Severe	22522	11	71	0	2.9
431	Yes	GB-132	GB-132-01	OX02-8908-V01	SAMEA8911176	ERS6594060	MZ515850	Infant case-control	4	NovaSeq 6000	A	Infant	<3 mo	Female	United Kingdom	Oxford	18-19	2018/11/25	2018/11/30	5	Yes	No	12	Moderate	204352	10611	77	194	100
432	No	GB-132	GB-132-02	OX02-8908-D02	SAMEA8910725	ERS6593610	MZ516010	Infant case-control	2	NovaSeq 6000	A	Infant	<3 mo	Female	United Kingdom	Oxford	18-19	2018/11/25	2018/12/01	6	Yes	No	12	Moderate	2260469	2845	83	52	99.6
433	No	GB-133	GB-133-01	OX02-8915-V01	SAMEA8910995	ERS6593880	MZ515677	Infant case-control	4	NovaSeq 6000	B	Infant	<3 mo	Female	United Kingdom	Oxford	19-20	2019/11/13	2019/11/18	5	Yes	No	5	Mild	145384	7311	77	134	100
434	Yes	GB-133	GB-133-02	OX02-8915-D02	SAMEA8910920	ERS6593805	MZ515953	Infant case-control	4	NovaSeq 6000	B	Infant	<3 mo	Female	United Kingdom	Oxford	19-20	2019/11/13	2019/11/19	6	Yes	No	5	Mild	419831	36975	82	677	100
435	No	GB-133	GB-133-03	OX02-8915-D03	SAMEA8910891	ERS6593776	MZ515919	Infant case-control	4	NovaSeq 6000	B	Infant	<3 mo	Female	United Kingdom	Oxford	19-20	2019/11/13	2019/11/20	7	Yes	No	5	Mild	361326	647	66	12	93.2
436	No	GB-133	GB-133-04	OX02-8915-D04	SAMEA8910997	ERS6593882	MZ515783	Infant case-control	4	NovaSeq 6000	B	Infant	<3 mo	Female	United Kingdom	Oxford	19-20	2019/11/13	2019/11/21	8	Yes	No	5	Mild	332184	425	68	8	76.5
437	No	GB-133	GB-133-05	OX02-8915-D05	SAMEA8911099	ERS6593984	NA	Infant case-control	4	NovaSeq 6000	B	Infant	<3 mo	Female	United Kingdom	Oxford	19-20	2019/11/13	2019/11/22	9	Yes	No	5	Mild	610344	2	78	0	0
438	No	GB-133	GB-133-08	OX02-8915-D08	SAMEA8911145	ERS6594030	NA	Infant case-control	4	NovaSeq 6000	B	Infant	<3 mo	Female	United Kingdom	Oxford	19-20	2019/11/13	2019/11/25	12	Yes	No	5	Mild	419712	7	78	0	1.3
439	No	GB-133	GB-133-09	OX02-8915-D09	SAMEA8910919	ERS6593804	NA	Infant case-control	4	NovaSeq 6000	B	Infant	<3 mo	Female	United Kingdom	Oxford	19-20	2019/11/13	2019/11/26	13	Yes	No	5	Mild	459	NA	NA	NA	NA
440	Yes	GB-134	GB-134	OX02-8917-V01	SAMEA8911036	ERS6593921	MZ515911	Infant case-control	4	NovaSeq 6000	A	Infant	3 to <6 mo	Male	United Kingdom	Oxford	19-20	2019/11/09	2019/11/12	3	No	No	0	Mild	1820626	67651	95	1242	100
441	Yes	GB-135	GB-135	OX02-8922-V01	SAMEA8910642	ERS6593527	MZ515970	Infant case-control	2	NovaSeq 6000	B	Infant	3 to <6 mo	Female	United Kingdom	Oxford	18-19	2018/12/12	2018/12/14	2	No	NA	NA	NA	1825112	18476	82	338	100
442	Yes	GB-136	GB-136-01	OX02-8936-V01	SAMEA8910616	ERS6593501	MZ515969	Infant case-control	2	NovaSeq 6000	A	Infant	3 to <6 mo	Female	United Kingdom	Oxford	18-19	2019/01/02	2019/01/04	2	Yes	No	12	Moderate	4572579	117375	97	2068	100
443	No	GB-136	GB-136-04	OX02-8936-D04	SAMEA8910758	ERS6593643	MZ516070	Infant case-control	2	NovaSeq 6000	A	Infant	3 to <6 mo	Female	United Kingdom	Oxford	18-19	2019/01/02	2019/01/07	5	Yes	No	12	Moderate	352365	1112	85	21	97
444	Yes	GB-137	GB-137-01	OX02-8937-V01	SAMEA8910589	ERS6593474	MZ515772	Infant case-control	2	NovaSeq 6000	A	Infant	>=6 mo	Male	United Kingdom	Oxford	18-19	2018/12/12	2018/12/14	2	Yes	Yes	7	Mild	820698	14904	89	271	100
445	Yes	GB-137	GB-137-02	OX02-8937-D02	SAMEA8910741	ERS6593626	MZ515933	Infant case-control	2	NovaSeq 6000	A	Infant	>=6 mo	Male	United Kingdom	Oxford	18-19	2018/12/12	2018/12/15	3	Yes	Yes	7	Mild	2937700	87375	95	1578	100
446	Yes	GB-137	GB-137-04	OX02-8937-D04	SAMEA8910537	ERS6593422	MZ515847	Infant case-control	2	NovaSeq 6000	A	Infant	>=6 mo	Male	United Kingdom	Oxford	18-19	2018/12/12	2018/12/17	5	Yes	Yes	7	Mild	833366	19920	91	361	100
447	Yes	GB-138	GB-138	OX02-8945-V01	SAMEA8911140	ERS6594025	MZ516042	Infant case-control	4	NovaSeq 6000	B	Infant	3 to <6 mo	Male	United Kingdom	Oxford	19-20	2019/11/04	2019/11/06	2	No	NA	NA	NA	1239679	68478	91	1253	100
448	No	GB-139	GB-139	OX02-8948-D01	SAMEA5870289	ERS3658777	LR699737	Infant case-control	1	MiSeq	A	Infant	3 to <6 mo	Female	United Kingdom	Oxford	17-18	2017/12/13	2017/12/19	6	Yes	Yes	8	Moderate	2226316	4899	53	115	100
449	Yes	GB-140	GB-140-01	OX02-8961-V01	SAMEA8910881	ERS6593766	MZ515635	Infant case-control	4	NovaSeq 6000	B	Infant	<3 mo	Female	United Kingdom	Oxford	19-20	2019/11/06	2019/11/09	3	Yes	No	18	Severe	2073277	158365	90	2862	100
450	Yes	GB-140	GB-140-02	OX02-8961-D02	SAMEA8910987	ERS6593872	MZ515607	Infant case-control	4	NovaSeq 6000	B	Infant	<3 mo	Female	United Kingdom	Oxford	19-20	2019/11/06	2019/11/10	4	Yes	No	18	Severe	2351348	204057	89	3550	100
451	Yes	GB-140	GB-140-04	OX02-8961-D04	SAMEA8910875	ERS6593760	MZ515914	Infant case-control	4	NovaSeq 6000	B	Infant	<3 mo	Female	United Kingdom	Oxford	19-20	2019/11/06	2019/11/12	6	Yes	No	18	Severe	2918625	142566	94	2436	100
452	Yes	GB-140	GB-140-05	OX02-8961-D05	SAMEA8910878	ERS6593763	MZ515934	Infant case-control	4	NovaSeq 6000	B	Infant	<3 mo	Female	United Kingdom	Oxford	19-20	2019/11/06	2019/11/13	7	Yes	No	18	Severe	314853	12417	76	228	100
453	No	GB-140	GB-140-06	OX02-8961-D06	SAMEA8911195	ERS6594079	MZ515622	Infant case-control	4	NovaSeq 6000	B	Infant	<3 mo	Female	United Kingdom	Oxford	19-20	2019/11/06	2019/11/14	8	Yes	No	18	Severe	658550	1454	77	27	99.6
454	No	GB-140	GB-140-07	OX02-8961-D07	SAMEA8911123	ERS6594008	NA	Infant case-control	4	NovaSeq 6000	B	Infant	<3 mo	Female	United Kingdom	Oxford	19-20	2019/11/06	2019/11/15	9	Yes	No	18	Severe	537763	376	76	7	58.5
455	No	GB-140	GB-140-10	OX02-8961-D10	SAMEA8910921	ERS6593806	MZ515721	Infant case-control	4	NovaSeq 6000	B	Infant	<3 mo	Female	United Kingdom	Oxford	19-20	2019/11/06	2019/11/18	12	Yes	No	18	Severe	445225	306	69	6	71.9
456	No	GB-140	GB-140-11	OX02-8961-D11	SAMEA8911093	ERS6593978	NA	Infant case-control	4	NovaSeq 6000	B	Infant	<3 mo	Female	United Kingdom	Oxford	19-20	2019/11/06	2019/11/19	13	Yes	No	18	Severe	488711	24	69	0	4.3
457	No	GB-140	GB-140-12	OX02-8961-D12	SAMEA8911226	ERS6594110	NA	Infant case-control	4	NovaSeq 6000	B	Infant	<3 mo	Female	United Kingdom	Oxford	19-20	2019/11/06	2019/11/20	14	Yes	No	18	Severe	567085	247	76	4	63.8
458	No	GB-140	GB-140-13	OX02-8961-D13	SAMEA8911008	ERS6593893	NA	Infant case-control	4	NovaSeq 6000	B	Infant	<3 mo	Female	United Kingdom	Oxford	19-20	2019/11/06	2019/11/21	15	Yes	No	18	Severe	329582	NA	NA	NA	NA
459	No	GB-140	GB-140-14	OX02-8961-D14	SAMEA8911111	ERS6593996	NA	Infant case-control	4	NovaSeq 6000	B	Infant	<3 mo	Female	United Kingdom	Oxford	19-20	2019/11/06	2019/11/22	16	Yes	No	18	Severe	338275	NA	NA	NA	NA
460	No	GB-141	GB-141-01	OX02-8985-V01	SAMEA8910433	ERS6593318	NA	Infant case-control	2	NovaSeq 6000	A/B	Infant	>=6 mo	Female	United Kingdom	Oxford	18-19	2018/10/23	2018/10/26	3	Yes	Yes	10	Moderate	408043	11173	90	198	100
461	No	GB-141	GB-141-04	OX02-8985-D04	SAMEA8910576	ERS6593461	MZ516109	Infant case-control	2	NovaSeq 6000	B	Infant	>=6 mo	Female	United Kingdom	Oxford	18-19	2018/10/23	2018/10/29	6	Yes	Yes	10	Moderate	691061	2480	87	45	99.4
462	No	GB-141	GB-141-05	OX02-8985-D05	SAMEA8910656	ERS6593541	MZ515976	Infant case-control	2	NovaSeq 6000	B	Infant	>=6 mo	Female	United Kingdom	Oxford	18-19	2018/10/23	2018/10/30	7	Yes	Yes	10	Moderate	1038778	495	77	9	81.1
463	Yes	GB-142	GB-142-01	OX02-8987-V01	SAMEA8910612	ERS6593497	MZ515959	Infant case-control	2	NovaSeq 6000	A	Infant	3 to <6 mo	Male	United Kingdom	Oxford	18-19	2018/11/30	2018/12/04	4	Yes	No	8	Moderate	598043	12213	88	218	100
464	No	GB-142	GB-142-02	OX02-8987-D02	SAMEA8910659	ERS6593544	MZ515600	Infant case-control	2	NovaSeq 6000	A	Infant	3 to <6 mo	Male	United Kingdom	Oxford	18-19	2018/11/30	2018/12/05	5	Yes	No	8	Moderate	283340	8676	89	157	100
465	Yes	GB-143	GB-143	OX02-9011-V01	SAMEA8910868	ERS6593753	MZ515571	Infant case-control	4	NovaSeq 6000	A	Infant	>=6 mo	Male	United Kingdom	Oxford	19-20	NA	2020/01/03	NA	Yes	Yes	10	Moderate	1956819	81940	94	1483	100
466	Yes	GB-144	GB-144	OX02-9175-V01	SAMEA8910923	ERS6593808	MZ516000	Infant case-control	4	NovaSeq 6000	A	Infant	>=6 mo	Female	United Kingdom	Oxford	19-20	2019/12/24	2019/12/31	7	Yes	No	6	Mild	602183	19152	85	351	100
467	No	GB-145	GB-145	OX02-9203-V01	SAMEA8911088	ERS6593973	NA	Infant case-control	4	NovaSeq 6000	A	Infant	3 to <6 mo	Female	United Kingdom	Oxford	19-20	2019/12/17	2019/12/24	7	Yes	No	5	Mild	395243	78	73	1	30.7
468	Yes	GB-146	GB-146-01	OX02-9216-V01	SAMEA8911019	ERS6593904	MZ515784	Infant case-control	4	NovaSeq 6000	A	Infant	3 to <6 mo	Male	United Kingdom	Oxford	19-20	2019/11/30	2019/12/03	3	Yes	No	10	Moderate	2371184	99306	92	1805	100
469	Yes	GB-146	GB-146-02	OX02-9216-D02	SAMEA8911142	ERS6594027	MZ515687	Infant case-control	4	NovaSeq 6000	A	Infant	3 to <6 mo	Male	United Kingdom	Oxford	19-20	2019/11/30	2019/12/04	4	Yes	No	10	Moderate	958140	28625	91	531	100
470	Yes	GB-146	GB-146-09	OX02-9216-D09	SAMEA8911238	ERS6594122	MZ515986	Infant case-control	4	NovaSeq 6000	A	Infant	3 to <6 mo	Male	United Kingdom	Oxford	19-20	2019/11/30	2019/12/11	11	Yes	No	10	Moderate	1957125	51817	90	940	100
471	No	GB-147	GB-147	OX02-9253-V01	SAMEA8911117	ERS6594002	NA	Infant case-control	4	NovaSeq 6000	B	Infant	<3 mo	Male	United Kingdom	Oxford	19-20	2019/11/15	2019/11/23	8	Yes	No	13	Moderate	300639	79	67	1	35.9
472	No	GB-148	GB-148	OX02-9267-V01	SAMEA8910994	ERS6593879	MZ515681	Infant case-control	4	NovaSeq 6000	A	Infant	3 to <6 mo	Male	United Kingdom	Oxford	19-20	2020/01/06	2020/01/11	5	Yes	Yes	14	Severe	2713166	3622	82	67	100
473	No	GB-149	GB-149	OX02-9283-V01	SAMEA8910930	ERS6593815	MZ515597	Infant case-control	4	NovaSeq 6000	A	Infant	<3 mo	Female	United Kingdom	Oxford	19-20	2019/12/26	2019/12/31	5	Yes	Yes	14	Severe	310476	4736	79	87	100
474	No	GB-150	GB-150-01	OX02-9328-V01	SAMEA8911030	ERS6593915	MZ515646	Infant case-control	4	NovaSeq 6000	A	Infant	>=6 mo	Female	United Kingdom	Oxford	19-20	2019/11/20	2019/11/23	3	Yes	Yes	9	Moderate	316586	4160	74	77	99.9
475	Yes	GB-150	GB-150-02	OX02-9328-D02	SAMEA8911165	ERS6594050	MZ516137	Infant case-control	4	NovaSeq 6000	A	Infant	>=6 mo	Female	United Kingdom	Oxford	19-20	2019/11/20	2019/11/24	4	Yes	Yes	9	Moderate	566510	10775	89	199	100
476	Yes	GB-151	GB-151	OX02-9355-V01	SAMEA8911077	ERS6593962	MZ516112	Infant case-control	4	NovaSeq 6000	A	Infant	<3 mo	Male	United Kingdom	Oxford	19-20	2019/12/24	2019/12/31	7	Yes	Yes	6	Mild	769151	23795	92	437	100
477	Yes	GB-152	GB-152	OX02-9369-V01	SAMEA8911079	ERS6593964	MZ515871	Infant case-control	4	NovaSeq 6000	B	Infant	3 to <6 mo	Male	United Kingdom	Oxford	19-20	2019/12/15	2019/12/19	4	Yes	No	9	Moderate	757965	25438	88	468	100
478	Yes	GB-153	GB-153-01	OX02-9397-V01	SAMEA8910965	ERS6593850	MZ515786	Infant case-control	4	NovaSeq 6000	B	Infant	3 to <6 mo	Male	United Kingdom	Oxford	19-20	2019/12/18	2019/12/24	6	Yes	Yes	13	Moderate	1483977	64266	89	1189	100
479	No	GB-153	GB-153-04	OX02-9397-D04	SAMEA8911068	ERS6593953	NA	Infant case-control	4	NovaSeq 6000	B	Infant	3 to <6 mo	Male	United Kingdom	Oxford	19-20	2019/12/18	2019/12/27	9	Yes	Yes	13	Moderate	656812	66	66	1	24.9
480	No	GB-154	GB-154-01	OX02-9450-V01	SAMEA8911097	ERS6593982	MZ515604	Infant case-control	4	NovaSeq 6000	A	Infant	<3 mo	Female	United Kingdom	Oxford	19-20	2019/12/23	2019/12/30	7	Yes	No	8	Moderate	475376	2335	84	42	97.9
481	No	GB-154	GB-154-02	OX02-9450-D02	SAMEA8911182	ERS6594066	MZ515858	Infant case-control	4	NovaSeq 6000	A	Infant	<3 mo	Female	United Kingdom	Oxford	19-20	2019/12/23	2019/12/31	8	Yes	No	8	Moderate	874451	2098	88	39	88.3
482	No	GB-154	GB-154-04	OX02-9450-D04	SAMEA8911225	ERS6594109	NA	Infant case-control	4	NovaSeq 6000	A	Infant	<3 mo	Female	United Kingdom	Oxford	19-20	2019/12/23	2020/01/02	10	Yes	No	8	Moderate	864499	NA	NA	NA	NA
483	Yes	GB-155	GB-155	OX02-9457-V01	SAMEA8910890	ERS6593775	MZ516049	Infant case-control	4	NovaSeq 6000	B	Infant	3 to <6 mo	Male	United Kingdom	Oxford	19-20	2020/01/21	2020/01/27	6	Yes	No	7	Mild	1852566	82647	94	1510	100
484	Yes	GB-157	GB-157	OX02-9549-V01	SAMEA8910905	ERS6593790	MZ515712	Infant case-control	4	NovaSeq 6000	B	Infant	<3 mo	Female	United Kingdom	Oxford	19-20	2019/12/23	2019/12/27	4	No	No	5	Mild	847521	47997	89	874	100
485	Yes	GB-158	GB-158	OX02-9571-V01	SAMEA8911205	ERS6594089	MZ515567	Infant case-control	4	NovaSeq 6000	A	Infant	>=6 mo	Male	United Kingdom	Oxford	19-20	2019/12/11	2019/12/15	4	Yes	Yes	6	Mild	356411	22753	75	416	100
486	Yes	GB-159	GB-159	OX02-9574-V01	SAMEA8910982	ERS6593867	MZ515904	Infant case-control	4	NovaSeq 6000	B	Infant	>=6 mo	Female	United Kingdom	Oxford	19-20	2020/01/08	2020/01/13	5	No	No	5	Mild	2149786	169115	85	3083	100
487	No	GB-160	GB-160-01	OX02-9586-V01	SAMEA8911198	ERS6594082	NA	Infant case-control	4	NovaSeq 6000	A	Infant	<3 mo	Male	United Kingdom	Oxford	19-20	2019/12/22	2019/12/30	8	Yes	No	8	Moderate	569996	53	70	1	20.6
488	No	GB-160	GB-160-02	OX02-9586-D02	SAMEA8911237	ERS6594121	NA	Infant case-control	4	NovaSeq 6000	A	Infant	<3 mo	Male	United Kingdom	Oxford	19-20	2019/12/22	2019/12/31	9	Yes	No	8	Moderate	566734	1	75	0	0
489	Yes	GB-161	GB-161-01	OX02-9657-V01	SAMEA8911223	ERS6594107	MZ515573	Infant case-control	4	NovaSeq 6000	A	Infant	3 to <6 mo	Male	United Kingdom	Oxford	19-20	2020/02/09	2020/02/13	4	Yes	No	7	Mild	598450	15446	82	285	100
490	No	GB-161	GB-161-02	OX02-9657-D02	SAMEA8911037	ERS6593922	MZ515879	Infant case-control	4	NovaSeq 6000	A	Infant	3 to <6 mo	Male	United Kingdom	Oxford	19-20	2020/02/09	2020/02/14	5	Yes	No	7	Mild	192456	663	68	12	93.2
491	No	GB-162	GB-162-01	OX02-9767-V01	SAMEA8911026	ERS6593911	NA	Infant case-control	4	NovaSeq 6000	A	Infant	<3 mo	Male	United Kingdom	Oxford	19-20	2020/01/22	2020/01/23	1	Yes	No	7	Mild	71877	28	65	1	12.2
492	No	GB-162	GB-162-02	OX02-9767-D02	SAMEA8911025	ERS6593910	MZ515662	Infant case-control	4	NovaSeq 6000	A	Infant	<3 mo	Male	United Kingdom	Oxford	19-20	2020/01/22	2020/01/24	2	Yes	No	7	Mild	146854	1264	70	22	97.8
493	Yes	GB-162	GB-162-06	OX02-9767-D06	SAMEA8910955	ERS6593840	MZ515993	Infant case-control	4	NovaSeq 6000	A	Infant	<3 mo	Male	United Kingdom	Oxford	19-20	2020/01/22	2020/01/28	6	Yes	No	7	Mild	1095422	44618	93	815	100
494	Yes	GB-162	GB-162-07	OX02-9767-D07	SAMEA8911219	ERS6594103	MZ516023	Infant case-control	4	NovaSeq 6000	A	Infant	<3 mo	Male	United Kingdom	Oxford	19-20	2020/01/22	2020/01/29	7	Yes	No	7	Mild	394621	20575	83	372	100
495	No	GB-162	GB-162-09	OX02-9767-D09	SAMEA8911160	ERS6594045	MZ515666	Infant case-control	4	NovaSeq 6000	A	Infant	<3 mo	Male	United Kingdom	Oxford	19-20	2020/01/22	2020/01/31	9	Yes	No	7	Mild	593176	4801	79	87	100
496	No	GB-162	GB-162-12	OX02-9767-D12	SAMEA8911023	ERS6593908	NA	Infant case-control	4	NovaSeq 6000	A	Infant	<3 mo	Male	United Kingdom	Oxford	19-20	2020/01/22	2020/02/03	12	Yes	No	7	Mild	376492	14	67	0	3.2
497	No	GB-163	GB-163	OX02-9773-V01	SAMEA8910884	ERS6593769	NA	Infant case-control	4	NovaSeq 6000	B	Infant	<3 mo	Male	United Kingdom	Oxford	19-20	2019/12/22	2019/12/27	5	Yes	Yes	11	Moderate	565	5	69	0	1.6
498	Yes	GB-164	GB-164-01	OX02-9775-V01	SAMEA8911188	ERS6594072	MZ515854	Infant case-control	4	NovaSeq 6000	A	Infant	3 to <6 mo	Female	United Kingdom	Oxford	19-20	2019/12/19	2019/12/24	5	Yes	Yes	13	Moderate	1215755	57903	89	1053	100
499	No	GB-164	GB-164-04	OX02-9775-D04	SAMEA8911185	ERS6594069	NA	Infant case-control	4	NovaSeq 6000	A	Infant	3 to <6 mo	Female	United Kingdom	Oxford	19-20	2019/12/19	2019/12/27	8	Yes	Yes	13	Moderate	564725	232	74	4	55
500	No	GB-165	GB-165-01	OX02-9801-V01	SAMEA8910980	ERS6593865	MZ515942	Infant case-control	4	NovaSeq 6000	A	Infant	<3 mo	Male	United Kingdom	Oxford	19-20	2019/12/09	2019/12/13	4	Yes	No	14	Severe	387341	7259	86	133	100
501	No	GB-165	GB-165-04	OX02-9801-D04	SAMEA8911207	ERS6594091	MZ516131	Infant case-control	4	NovaSeq 6000	A	Infant	<3 mo	Male	United Kingdom	Oxford	19-20	2019/12/09	2019/12/16	7	Yes	No	14	Severe	372596	1856	72	34	95.3
502	No	GB-165	GB-165-06	OX02-9801-D06	SAMEA8910959	ERS6593844	MZ515668	Infant case-control	4	NovaSeq 6000	A	Infant	<3 mo	Male	United Kingdom	Oxford	19-20	2019/12/09	2019/12/18	9	Yes	No	14	Severe	232024	2773	74	51	100
503	No	GB-166	GB-166	OX02-9839-V01	SAMEA8911108	ERS6593993	MZ515802	Infant case-control	4	NovaSeq 6000	A	Infant	<3 mo	Male	United Kingdom	Oxford	19-20	2019/12/01	2019/12/03	2	Yes	No	12	Moderate	1074040	7248	88	134	100
504	Yes	GB-167	GB-167	OX02-9843-V01	SAMEA8911009	ERS6593894	MZ516029	Infant case-control	4	NovaSeq 6000	A	Infant	3 to <6 mo	Male	United Kingdom	Oxford	19-20	NA	2019/12/10	NA	Yes	No	10	Moderate	1432001	67764	89	1245	100
505	No	GB-168	GB-168	OX02-9885-V01	SAMEA8911059	ERS6593944	MZ516040	Infant case-control	4	NovaSeq 6000	A	Infant	<3 mo	Male	United Kingdom	Oxford	19-20	2019/12/07	2019/12/13	6	Yes	No	14	Severe	577089	8263	88	152	100
506	No	GB-169	GB-169	OX02-9970-V01	SAMEA8911154	ERS6594039	MZ516012	Infant case-control	4	NovaSeq 6000	A	Infant	<3 mo	Male	United Kingdom	Oxford	19-20	2019/12/11	2019/12/15	4	Yes	No	10	Moderate	689910	8377	87	154	100
507	No	GB-170	GB-170	OX03-0015-V02	SAMEA8910723	ERS6593608	MZ516045	Adult cohort	2	NovaSeq 6000	B	Adult	>=75 yr	Male	United Kingdom	Oxford	17-18	2017/12/17	2017/12/19	2	No	Yes	NA	Moderate	297757	5207	84	95	100
508	No	GB-171	GB-171	OX03-0094-V02	SAMEA8910761	ERS6593646	MZ516130	Adult cohort	2	NovaSeq 6000	A	Adult	60 to <75 yr	Male	United Kingdom	Oxford	17-18	2018/01/25	2018/01/30	5	No	Yes	NA	Mild	263979	1632	79	30	100
509	Yes	GB-172	GB-172	OX03-0187-V02	SAMEA8910484	ERS6593369	MZ515716	Adult cohort	2	NovaSeq 6000	B	Adult	>=75 yr	Male	United Kingdom	Oxford	18-19	2018/10/27	2018/11/01	5	No	No	NA	Mild	1023490	40743	93	725	100
510	No	GB-173	GB-173	OX03-0225-V02	SAMEA8910721	ERS6593606	NA	Adult cohort	2	NovaSeq 6000	A	Adult	>=75 yr	Female	United Kingdom	Oxford	18-19	2018/11/29	2018/12/03	4	No	No	NA	Moderate	312133	6	79	0	0
511	No	GB-174	GB-174	OX03-0231-V02	SAMEA8910600	ERS6593485	MZ515988	Adult cohort	2	NovaSeq 6000	B	Adult	>=75 yr	Male	United Kingdom	Oxford	18-19	2018/11/23	2018/11/28	5	No	No	NA	Mild	317453	1432	77	26	99.5
512	No	GB-175	GB-175	OX03-0270-V02	SAMEA8910662	ERS6593547	NA	Adult cohort	2	NovaSeq 6000	NA	Adult	>=75 yr	Female	United Kingdom	Oxford	18-19	2018/11/23	2018/11/26	3	No	Yes	NA	Mild	228389	1	92	0	0
513	Yes	GB-176	GB-176	OX03-0310-V02	SAMEA8910493	ERS6593378	MZ515561	Adult cohort	2	NovaSeq 6000	B	Adult	>=75 yr	Male	United Kingdom	Oxford	18-19	2019/01/30	2019/02/04	5	No	No	NA	Mild	2167115	87608	94	1565	100
514	No	GB-177	GB-177	OX03-0335-V02	SAMEA8910513	ERS6593398	NA	Adult cohort	2	NovaSeq 6000	B	Adult	>=75 yr	Female	United Kingdom	Oxford	18-19	2018/12/13	2018/12/19	6	No	No	NA	Moderate	388419	3	84	0	1.8
515	Yes	NL-001	NL-001	UU01A-0007-V02	SAMEA8910770	ERS6593655	MZ515710	Birth cohort	2	NovaSeq 6000	B	Infant	<3 mo	Male	Netherlands	Utrecht	17-18	2017/12/07	2017/12/08	1	No	No	6	Mild	501213	34067	90	621	100
516	Yes	NL-002	NL-002	UU01A-0008-V02	SAMEA8910824	ERS6593709	MZ515743	Birth cohort	3	MiSeq	B	Infant	<3 mo	Male	Netherlands	Utrecht	17-18	2017/12/23	2017/12/28	5	Yes	Yes	11	Moderate	140985	10947	83	339	100
517	No	NL-003	NL-003	UU01A-0018-V02	SAMEA8910781	ERS6593666	NA	Birth cohort	3	MiSeq	A	Infant	<3 mo	Female	Netherlands	Utrecht	17-18	2018/01/19	2018/01/23	4	No	No	6	Mild	96038	125	30	4	56.1
518	Yes	NL-004	NL-004	UU01A-0023-V02	SAMEA8910827	ERS6593712	MZ515761	Birth cohort	3	MiSeq	B	Infant	>=6 mo	Male	Netherlands	Utrecht	18-19	2018/11/28	2018/11/29	1	No	Yes	3	Mild	772883	162642	73	4509	100
519	Yes	NL-005	NL-005	UU01A-0024-V02	SAMEA8910855	ERS6593740	MZ515845	Birth cohort	3	MiSeq	B	Infant	>=6 mo	Female	Netherlands	Utrecht	18-19	2018/11/20	2018/11/23	3	No	Yes	9	Moderate	193996	20029	77	620	100
520	Yes	NL-006	NL-006	UU01A-0026-V02	SAMEA8910693	ERS6593578	MZ515658	Birth cohort	2	NovaSeq 6000	B	Infant	>=6 mo	Male	Netherlands	Utrecht	18-19	2018/11/11	2018/11/15	4	No	Yes	8	Moderate	3253310	44619	88	811	100
521	Yes	NL-007	NL-007	UU01A-0031-V02	SAMEA8910785	ERS6593670	MZ515883	Birth cohort	3	MiSeq	B	Infant	>=6 mo	Male	Netherlands	Utrecht	18-19	2018/11/09	2018/11/13	4	No	Yes	4	Mild	133533	12484	78	390	100
522	Yes	NL-008	NL-008	UU01A-0034-V02	SAMEA8910860	ERS6593745	MZ515558	Birth cohort	3	MiSeq	B	Infant	>=6 mo	Male	Netherlands	Utrecht	18-19	2018/11/16	2018/11/20	4	NA	Yes	5	Mild	305391	86192	62	2619	100
523	Yes	NL-009	NL-009	UU01A-0035-V02	SAMEA8910780	ERS6593665	MZ516135	Birth cohort	3	MiSeq	B	Infant	>=6 mo	Male	Netherlands	Utrecht	18-19	2018/11/25	2018/11/26	1	NA	Yes	7	Mild	284009	38574	69	1154	100
524	Yes	NL-010	NL-010	UU01A-0040-V02	SAMEA8910799	ERS6593684	MZ515944	Birth cohort	3	MiSeq	B	Infant	>=6 mo	Male	Netherlands	Utrecht	18-19	2018/11/19	2018/11/26	7	NA	No	3	Mild	234000	24022	46	718	100
525	Yes	NL-011	NL-011	UU01A-0042-V02	SAMEA8910696	ERS6593581	MZ516022	Birth cohort	2	NovaSeq 6000	B	Infant	>=6 mo	Male	Netherlands	Utrecht	18-19	2018/11/25	2018/11/29	4	No	No	2	Mild	1792183	33932	89	614	100
526	No	NL-012	NL-012	UU01A-0043-V02	SAMEA8910863	ERS6593748	MZ515947	Birth cohort	3	MiSeq	B	Infant	>=6 mo	Female	Netherlands	Utrecht	18-19	2018/12/01	2018/12/04	3	No	Yes	5	Mild	9494	590	35	18	88.8
527	No	NL-013	NL-013	UU01A-0048-V02	SAMEA8963477	ERS6646226	NA	Birth cohort	3	MiSeq	NA	Infant	>=6 mo	Female	Netherlands	Utrecht	18-19	2018/12/17	2018/12/18	1	No	No	4	Mild	291320	NA	NA	NA	0
528	Yes	NL-014	NL-014	UU01A-0049-V02	SAMEA8910811	ERS6593696	MZ515833	Birth cohort	3	MiSeq	A	Infant	>=6 mo	Female	Netherlands	Utrecht	18-19	2018/12/05	2018/12/10	5	No	No	4	Mild	425928	23172	77	688	100
529	No	NL-015	NL-015	UU01A-0050-V02	SAMEA8910689	ERS6593574	NA	Birth cohort	2	NovaSeq 6000	B	Infant	>=6 mo	Female	Netherlands	Utrecht	18-19	2018/11/30	2018/12/03	3	No	No	4	Mild	467179	23	72	0	8.1
530	No	NL-016	NL-016	UU01A-0052-V02	SAMEA8910856	ERS6593741	NA	Birth cohort	3	MiSeq	B	Infant	>=6 mo	Female	Netherlands	Utrecht	18-19	2018/12/14	2018/12/17	3	NA	No	6	Mild	77792	67	39	2	31
531	No	NL-017	NL-017	UU01A-0055-V02	SAMEA8910793	ERS6593678	MZ515813	Birth cohort	3	MiSeq	B	Infant	>=6 mo	Female	Netherlands	Utrecht	18-19	2018/12/02	2018/12/03	1	No	No	4	Mild	126593	1558	46	47	98.3
532	No	NL-018	NL-018	UU01A-0060-V02	SAMEA8910813	ERS6593698	MZ515722	Birth cohort	3	MiSeq	A	Infant	3 to <6 mo	Male	Netherlands	Utrecht	18-19	2018/11/28	2018/11/30	2	No	Yes	3	Mild	80868	2733	77	84	93.8
533	Yes	NL-019	NL-019	UU01A-0066-V02	SAMEA8910778	ERS6593663	MZ515639	Birth cohort	3	MiSeq	B	Infant	3 to <6 mo	Male	Netherlands	Utrecht	18-19	2018/12/01	2018/12/04	3	No	Yes	6	Mild	229649	31494	79	971	100
534	Yes	NL-020	NL-020	UU01A-0069-V02	SAMEA8910820	ERS6593705	MZ515605	Birth cohort	3	MiSeq	B	Infant	3 to <6 mo	Female	Netherlands	Utrecht	18-19	2019/01/13	2019/01/15	2	No	Yes	7	Mild	1163216	113775	88	3117	100
535	Yes	NL-021	NL-021	UU01A-0073-V02	SAMEA8910782	ERS6593667	MZ515967	Birth cohort	3	MiSeq	A	Infant	<3 mo	Male	Netherlands	Utrecht	18-19	2018/12/12	2018/12/13	1	No	No	5	Mild	261862	18920	71	610	100
536	Yes	NL-022	NL-022	UU01A-0076-V02	SAMEA8911159	ERS6594044	MZ515651	Birth cohort	4	NovaSeq 6000	A	Infant	>=6 mo	Female	Netherlands	Utrecht	19-20	2019/11/19	2019/11/22	3	NA	Yes	5	Mild	1365081	48913	94	900	100
537	Yes	NL-023	NL-023	UU01A-0080-V02	SAMEA8910806	ERS6593691	MZ515660	Birth cohort	3	MiSeq	B	Infant	<3 mo	Female	Netherlands	Utrecht	18-19	2018/12/16	2018/12/19	3	NA	Yes	8	Moderate	191691	29276	66	866	100
538	Yes	NL-024	NL-024	UU01A-0086-V02	SAMEA8910885	ERS6593770	MZ515877	Birth cohort	4	NovaSeq 6000	A	Infant	>=6 mo	Female	Netherlands	Utrecht	19-20	2019/12/08	2019/12/12	4	No	No	5	Mild	5037218	222119	94	3564	100
539	No	NL-025	NL-025	UU01A-0091-V02	SAMEA8911076	ERS6593961	MZ515960	Birth cohort	4	NovaSeq 6000	A	Infant	>=6 mo	Female	Netherlands	Utrecht	19-20	2019/12/12	2019/12/17	5	No	No	6	Mild	431023	662	73	12	91.1
540	Yes	NL-026	NL-026	UU01A-0092-V02	SAMEA8911193	ERS6594077	MZ515913	Birth cohort	4	NovaSeq 6000	A	Infant	>=6 mo	Female	Netherlands	Utrecht	19-20	2019/11/20	2019/11/25	5	No	Yes	9	Moderate	590501	22301	93	408	100
541	No	NL-027	NL-027	UU01A-0093-V02	SAMEA8910979	ERS6593864	MZ516068	Birth cohort	4	NovaSeq 6000	A	Infant	>=6 mo	Male	Netherlands	Utrecht	19-20	2019/11/21	2019/11/25	4	No	Yes	6	Mild	401666	5091	80	94	100
542	Yes	NL-028	NL-028	UU01A-0095-V02	SAMEA8911058	ERS6593943	MZ516024	Birth cohort	4	NovaSeq 6000	A	Infant	>=6 mo	Male	Netherlands	Utrecht	19-20	2019/11/27	2019/12/02	5	No	Yes	7	Mild	7726797	268843	96	4011	100
543	No	NL-029	NL-029	UU01A-0096-V02	SAMEA8911152	ERS6594037	MZ515766	Birth cohort	4	NovaSeq 6000	A	Infant	>=6 mo	Female	Netherlands	Utrecht	19-20	2019/10/25	2019/10/28	3	No	Yes	6	Mild	371023	7604	87	140	100
544	No	NL-030	NL-030	UU01A-0102-V02	SAMEA8911199	ERS6594083	MZ516099	Birth cohort	4	NovaSeq 6000	A	Infant	>=6 mo	Male	Netherlands	Utrecht	19-20	2019/11/24	2019/11/27	3	No	No	5	Mild	511844	1032	76	19	96
545	No	NL-031	NL-031	UU01A-0103-V02	SAMEA8910872	ERS6593757	MZ515717	Birth cohort	4	NovaSeq 6000	A	Infant	>=6 mo	Female	Netherlands	Utrecht	19-20	2019/12/14	2019/12/18	4	No	Yes	6	Mild	393939	7190	84	133	100
546	Yes	NL-032	NL-032	UU01A-0105-V02	SAMEA8911155	ERS6594040	MZ515803	Birth cohort	4	NovaSeq 6000	A	Infant	>=6 mo	Female	Netherlands	Utrecht	19-20	2019/11/16	2019/11/19	3	No	Yes	5	Mild	1070291	14040	89	259	100
547	Yes	NL-033	NL-033	UU01A-0109-V02	SAMEA8911209	ERS6594093	MZ515680	Birth cohort	4	NovaSeq 6000	A	Infant	>=6 mo	Male	Netherlands	Utrecht	19-20	2019/11/03	2019/11/06	3	Yes	Yes	7	Mild	1713077	55669	96	1025	100
548	No	NL-034	NL-034	UU01A-0112-V02	SAMEA8911090	ERS6593975	MZ515734	Birth cohort	4	NovaSeq 6000	A	Infant	>=6 mo	Female	Netherlands	Utrecht	19-20	2019/12/04	2019/12/10	6	No	No	4	Mild	127313	550	48	10	96.9
549	Yes	NL-035	NL-035	UU01A-0114-V02	SAMEA8910906	ERS6593791	MZ515889	Birth cohort	4	NovaSeq 6000	B	Infant	>=6 mo	Female	Netherlands	Utrecht	19-20	2019/12/01	2019/12/04	3	No	No	5	Mild	1078649	59794	89	1095	100
550	Yes	NL-036	NL-036	UU01A-0117-V02	SAMEA8911141	ERS6594026	MZ515794	Birth cohort	4	NovaSeq 6000	B	Infant	>=6 mo	Male	Netherlands	Utrecht	19-20	2019/12/09	2019/12/12	3	No	Yes	7	Mild	10223298	306423	96	4768	100
551	Yes	NL-037	NL-037	UU01A-0123-V02	SAMEA8910957	ERS6593842	MZ515801	Birth cohort	4	NovaSeq 6000	A	Infant	>=6 mo	Male	Netherlands	Utrecht	19-20	2019/11/21	2019/11/25	4	No	Yes	5	Mild	3123804	91247	95	1659	100
552	No	NL-038	NL-038	UU01A-0124-V02	SAMEA8910900	ERS6593785	MZ516134	Birth cohort	4	NovaSeq 6000	A	Infant	>=6 mo	Male	Netherlands	Utrecht	19-20	2019/11/28	2019/12/03	5	No	No	4	Mild	585058	2548	69	47	100
553	Yes	NL-039	NL-039	UU01A-0126-V02	SAMEA8910925	ERS6593810	MZ515701	Birth cohort	4	NovaSeq 6000	A	Infant	>=6 mo	Female	Netherlands	Utrecht	19-20	2019/12/10	2019/12/13	3	No	No	6	Mild	265801	15001	82	277	100
554	Yes	NL-040	NL-040	UU01A-0128-V02	SAMEA8911184	ERS6594068	MZ515898	Birth cohort	4	NovaSeq 6000	A	Infant	>=6 mo	Female	Netherlands	Utrecht	19-20	2019/12/01	2019/12/05	4	No	Yes	7	Mild	515295	15207	91	280	100
555	Yes	NL-041	NL-041	UU01A-0134-V02	SAMEA8911107	ERS6593992	MZ515634	Birth cohort	4	NovaSeq 6000	A	Infant	>=6 mo	Female	Netherlands	Utrecht	19-20	2019/12/10	2019/12/13	3	No	No	6	Mild	769659	33888	93	616	100
556	Yes	NL-042	NL-042	UU01A-0135-V02	SAMEA8910986	ERS6593871	MZ516088	Birth cohort	4	NovaSeq 6000	A	Infant	>=6 mo	Female	Netherlands	Utrecht	19-20	2019/12/13	2019/12/18	5	No	No	3	Mild	1000647	10363	87	191	100
557	Yes	NL-043	NL-043	UU01A-0136-V02	SAMEA8911109	ERS6593994	MZ515718	Birth cohort	4	NovaSeq 6000	A	Infant	>=6 mo	Female	Netherlands	Utrecht	19-20	2019/12/18	2019/12/20	2	No	Yes	7	Mild	304838	15472	83	286	100
558	No	NL-044	NL-044	UU01A-0138-V02	SAMEA8911156	ERS6594041	MZ516078	Birth cohort	4	NovaSeq 6000	A	Infant	>=6 mo	Female	Netherlands	Utrecht	19-20	2019/12/05	2019/12/09	4	Yes	Yes	7	Mild	1201477	2161	90	40	98.9
559	Yes	NL-045	NL-045	UU01A-0141-V02	SAMEA8911139	ERS6594024	MZ515971	Birth cohort	4	NovaSeq 6000	A	Infant	3 to <6 mo	Female	Netherlands	Utrecht	19-20	2019/11/27	2019/12/04	7	No	Yes	6	Mild	3675790	88139	97	1621	100
560	Yes	NL-046	NL-046	UU01A-0142-V02	SAMEA8911001	ERS6593886	MZ515599	Birth cohort	4	NovaSeq 6000	B	Infant	>=6 mo	Male	Netherlands	Utrecht	19-20	2019/12/11	2019/12/12	1	No	Yes	8	Moderate	895683	71921	87	1320	100
561	No	NL-047	NL-047	UU01A-0143-V02	SAMEA8963478	ERS6646227	NA	Birth cohort	4	NovaSeq 6000	NA	Infant	3 to <6 mo	Male	Netherlands	Utrecht	19-20	2019/10/28	2019/10/30	2	No	Yes	7	Mild	297761	NA	NA	NA	0
562	No	NL-048	NL-048	UU01A-0144-V02	SAMEA8910902	ERS6593787	MZ515884	Birth cohort	4	NovaSeq 6000	A	Infant	>=6 mo	Female	Netherlands	Utrecht	19-20	2019/12/08	2019/12/11	3	No	No	5	Mild	254962	4298	85	79	100
563	Yes	NL-049	NL-049	UU01A-0148-V02	SAMEA8911075	ERS6593960	MZ516080	Birth cohort	4	NovaSeq 6000	A	Infant	3 to <6 mo	Female	Netherlands	Utrecht	19-20	2019/11/19	2019/11/21	2	No	Yes	6	Mild	2954073	94383	95	1736	100
564	No	NL-050	NL-050	UU01A-0149-V02	SAMEA8911104	ERS6593989	NA	Birth cohort	4	NovaSeq 6000	A	Infant	3 to <6 mo	Female	Netherlands	Utrecht	19-20	2019/12/02	2019/12/11	9	NA	No	4	Mild	410600	92	72	2	32.6
565	No	NL-051	NL-051	UU01A-0150-V02	SAMEA8910894	ERS6593779	MZ515901	Birth cohort	4	NovaSeq 6000	A	Infant	3 to <6 mo	Male	Netherlands	Utrecht	19-20	2019/12/21	2019/12/24	3	No	No	4	Mild	2657293	117349	94	2116	100
566	Yes	NL-052	NL-052	UU01A-0151-V02	SAMEA8910938	ERS6593823	MZ516090	Birth cohort	4	NovaSeq 6000	A	Infant	3 to <6 mo	Female	Netherlands	Utrecht	19-20	2019/11/19	2019/11/22	3	No	No	5	Mild	2546651	93057	95	1697	100
567	Yes	NL-053	NL-053	UU01A-0154-V02	SAMEA8911084	ERS6593969	MZ515841	Birth cohort	4	NovaSeq 6000	A	Infant	3 to <6 mo	Female	Netherlands	Utrecht	19-20	2019/12/01	2019/12/04	3	No	No	5	Mild	928783	40554	92	745	100
568	No	NL-054	NL-054	UU01A-0155-V02	SAMEA8911022	ERS6593907	MZ515592	Birth cohort	4	NovaSeq 6000	A	Infant	3 to <6 mo	Male	Netherlands	Utrecht	19-20	2019/11/27	2019/11/28	1	No	No	4	Mild	255786	8175	76	151	100
569	No	NL-055	NL-055	UU01A-0158-V02	SAMEA8911044	ERS6593929	NA	Birth cohort	4	NovaSeq 6000	A/B	Infant	3 to <6 mo	Female	Netherlands	Utrecht	19-20	2019/12/01	2019/12/03	2	No	No	4	Mild	345865	411	69	7	84.9
570	Yes	NL-056	NL-056	UU01A-0159-V02	SAMEA8910918	ERS6593803	MZ515825	Birth cohort	4	NovaSeq 6000	A	Infant	3 to <6 mo	Female	Netherlands	Utrecht	19-20	2019/12/01	2019/12/03	2	No	No	4	Mild	8415922	577453	92	7053	100
571	Yes	NL-057	NL-057	UU01A-0160-V02	SAMEA8910909	ERS6593794	MZ515595	Birth cohort	4	NovaSeq 6000	B	Infant	3 to <6 mo	Female	Netherlands	Utrecht	19-20	2019/12/14	2019/12/17	3	No	No	4	Mild	1055857	102703	86	1880	100
572	Yes	NL-058	NL-058	UU01A-0164-V02	SAMEA8911190	ERS6594074	MZ515744	Birth cohort	4	NovaSeq 6000	A	Infant	3 to <6 mo	Female	Netherlands	Utrecht	19-20	2019/12/25	2019/12/30	5	No	No	5	Mild	729301	40180	83	727	100
573	Yes	NL-059	NL-059	UU01A-0165-V02	SAMEA8911213	ERS6594097	MZ515628	Birth cohort	4	NovaSeq 6000	A	Infant	<3 mo	Male	Netherlands	Utrecht	19-20	2019/11/29	2019/12/03	4	No	Yes	8	Moderate	10488257	293812	96	4676	100
574	Yes	NL-060	NL-060	UU01A-0172-V02	SAMEA8911034	ERS6593919	MZ515649	Birth cohort	4	NovaSeq 6000	A	Infant	<3 mo	Female	Netherlands	Utrecht	19-20	2019/11/24	2019/11/29	5	No	No	6	Mild	662452	54274	82	997	100
575	No	NL-061	NL-061	UU01A-0175-V02	SAMEA8911035	ERS6593920	MZ515643	Birth cohort	4	NovaSeq 6000	A	Infant	<3 mo	Male	Netherlands	Utrecht	19-20	2019/12/01	2019/12/05	4	No	Yes	6	Mild	100736	5994	85	111	100
576	Yes	NL-062	NL-062	UU01A-0176-V02	SAMEA8911166	ERS6594051	MZ516039	Birth cohort	4	NovaSeq 6000	A	Infant	<3 mo	Female	Netherlands	Utrecht	19-20	2019/11/16	2019/11/18	2	No	No	3	Mild	2128791	115170	91	2119	100
577	No	NL-063	NL-063	UU01A-0180-V02	SAMEA8963479	ERS6646228	NA	Birth cohort	4	NovaSeq 6000	NA	Infant	<3 mo	Female	Netherlands	Utrecht	19-20	2019/12/16	2019/12/19	3	No	No	3	Mild	264786	NA	NA	NA	0
578	Yes	NL-064	NL-064	UU01A-0184-V02	SAMEA8911135	ERS6594020	MZ515696	Birth cohort	4	NovaSeq 6000	A	Infant	<3 mo	Male	Netherlands	Utrecht	19-20	2019/11/29	2019/12/02	3	No	No	4	Mild	445063	23450	85	433	100
579	No	NL-065	NL-065-01	UU02-0001-V01	SAMEA8910692	ERS6593577	NA	Infant case-control	2	NovaSeq 6000	B	Infant	<3 mo	Female	Netherlands	Utrecht	17-18	2017/10/29	2017/11/07	9	Yes	No	14	Severe	223127	NA	NA	NA	NA
580	No	NL-065	NL-065-02	UU02-0001-D02	SAMEA8910527	ERS6593412	MZ515849	Infant case-control	2	NovaSeq 6000	B	Infant	<3 mo	Female	Netherlands	Utrecht	17-18	2017/10/29	2017/11/08	10	Yes	No	14	Severe	1627071	2392	84	43	100
581	No	NL-065	NL-065-03	UU02-0001-D03	SAMEA8910577	ERS6593462	NA	Infant case-control	2	NovaSeq 6000	B	Infant	<3 mo	Female	Netherlands	Utrecht	17-18	2017/10/29	2017/11/09	11	Yes	No	14	Severe	276152	57	85	1	22
582	No	NL-065	NL-065-04	UU02-0001-D04	SAMEA8910764	ERS6593649	NA	Infant case-control	2	NovaSeq 6000	B	Infant	<3 mo	Female	Netherlands	Utrecht	17-18	2017/10/29	2017/11/10	12	Yes	No	14	Severe	1168443	57	80	1	26
583	No	NL-065	NL-065-10	UU02-0001-D10	SAMEA8910752	ERS6593637	NA	Infant case-control	2	NovaSeq 6000	B	Infant	<3 mo	Female	Netherlands	Utrecht	17-18	2017/10/29	2017/11/16	18	Yes	No	14	Severe	3061296	5	69	0	2.5
584	No	NL-065	NL-065-11	UU02-0001-D11	SAMEA8910584	ERS6593469	NA	Infant case-control	2	NovaSeq 6000	B	Infant	<3 mo	Female	Netherlands	Utrecht	17-18	2017/10/29	2017/11/17	19	Yes	No	14	Severe	263612	NA	NA	NA	NA
585	No	NL-065	NL-065-14	UU02-0001-D14	SAMEA8910419	ERS6593304	NA	Infant case-control	2	NovaSeq 6000	B	Infant	<3 mo	Female	Netherlands	Utrecht	17-18	2017/10/29	2017/11/20	22	Yes	No	14	Severe	593336	49	81	1	17.1
586	No	NL-066	NL-066	UU02-0002-V01	SAMEA8910783	ERS6593668	MZ515843	Infant case-control	3	MiSeq	B	Infant	<3 mo	Male	Netherlands	Utrecht	17-18	2017/11/06	2017/11/09	3	Yes	No	8	Moderate	71577	2306	48	69	100
587	Yes	NL-067	NL-067-01	UU02-0003-V01	SAMEA8910808	ERS6593693	MZ516087	Infant case-control	3	MiSeq	A	Infant	<3 mo	Male	Netherlands	Utrecht	17-18	2017/11/11	2017/11/14	3	Yes	No	6	Mild	247220	23769	84	713	100
588	Yes	NL-067	NL-067-02	UU02-0003-D02	SAMEA8910508	ERS6593393	MZ515840	Infant case-control	2	NovaSeq 6000	A	Infant	<3 mo	Male	Netherlands	Utrecht	17-18	2017/11/11	2017/11/15	4	Yes	No	6	Mild	928416	32948	94	591	100
589	No	NL-067	NL-067-04	UU02-0003-D04	SAMEA8910526	ERS6593411	MZ515654	Infant case-control	2	NovaSeq 6000	A	Infant	<3 mo	Male	Netherlands	Utrecht	17-18	2017/11/11	2017/11/17	6	Yes	No	6	Mild	321826	416	87	8	79.4
590	Yes	NL-068	NL-068	UU02-0004-V01	SAMEA8910681	ERS6593566	MZ515926	Infant case-control	2	NovaSeq 6000	B	Infant	3 to <6 mo	Male	Netherlands	Utrecht	17-18	2017/11/12	2017/11/14	2	Yes	No	7	Mild	442880	22980	90	413	100
591	No	NL-069	NL-069	UU02-0005-V01	SAMEA8910831	ERS6593716	MZ516025	Infant case-control	3	MiSeq	B	Infant	>=6 mo	Female	Netherlands	Utrecht	17-18	2017/11/13	2017/11/17	4	No	Yes	8	Moderate	88591	2762	55	86	99.7
592	Yes	NL-070	NL-070-01	UU02-0006-V01	SAMEA8910830	ERS6593715	MZ516141	Infant case-control	3	MiSeq	B	Infant	>=6 mo	Male	Netherlands	Utrecht	17-18	2017/11/13	2017/11/18	5	Yes	Yes	17	Severe	383241	40124	87	1231	100
593	Yes	NL-070	NL-070-03	UU02-0006-D03	SAMEA8910738	ERS6593623	MZ516126	Infant case-control	2	NovaSeq 6000	B	Infant	>=6 mo	Male	Netherlands	Utrecht	17-18	2017/11/13	2017/11/20	7	Yes	Yes	17	Severe	277303	14239	80	256	100
594	No	NL-070	NL-070-04	UU02-0006-D04	SAMEA8910511	ERS6593396	MZ515892	Infant case-control	2	NovaSeq 6000	B	Infant	>=6 mo	Male	Netherlands	Utrecht	17-18	2017/11/13	2017/11/21	8	Yes	Yes	17	Severe	436870	7394	91	133	100
595	Yes	NL-070	NL-070-05	UU02-0006-D05	SAMEA8910608	ERS6593493	MZ515729	Infant case-control	2	NovaSeq 6000	B	Infant	>=6 mo	Male	Netherlands	Utrecht	17-18	2017/11/13	2017/11/22	9	Yes	Yes	17	Severe	506564	12822	90	233	100
596	No	NL-070	NL-070-07	UU02-0006-D07	SAMEA8910555	ERS6593440	MZ515624	Infant case-control	2	NovaSeq 6000	B	Infant	>=6 mo	Male	Netherlands	Utrecht	17-18	2017/11/13	2017/11/24	11	Yes	Yes	17	Severe	736981	358	85	6	71.9
597	No	NL-070	NL-070-10	UU02-0006-D10	SAMEA8910630	ERS6593515	MZ515952	Infant case-control	2	NovaSeq 6000	B	Infant	>=6 mo	Male	Netherlands	Utrecht	17-18	2017/11/13	2017/11/27	14	Yes	Yes	17	Severe	208944	1006	76	18	95.1
598	No	NL-070	NL-070-11	UU02-0006-D11	SAMEA8910735	ERS6593620	NA	Infant case-control	2	NovaSeq 6000	B	Infant	>=6 mo	Male	Netherlands	Utrecht	17-18	2017/11/13	2017/11/28	15	Yes	Yes	17	Severe	22795	4	43	0	1.5
599	No	NL-070	NL-070-13	UU02-0006-D13	SAMEA8910679	ERS6593564	NA	Infant case-control	2	NovaSeq 6000	B	Infant	>=6 mo	Male	Netherlands	Utrecht	17-18	2017/11/13	2017/11/30	17	Yes	Yes	17	Severe	190189	2	71	0	0
600	No	NL-070	NL-070-19	UU02-0006-D19	SAMEA8910754	ERS6593639	NA	Infant case-control	2	NovaSeq 6000	B	Infant	>=6 mo	Male	Netherlands	Utrecht	17-18	2017/11/13	2017/12/06	23	Yes	Yes	17	Severe	164389	4	91	0	1.7
601	No	NL-071	NL-071	UU02-0007-V01	SAMEA8910790	ERS6593675	MZ515578	Infant case-control	3	MiSeq	B	Infant	3 to <6 mo	Male	Netherlands	Utrecht	17-18	2017/11/20	2017/11/24	4	Yes	Yes	11	Moderate	117990	8804	40	256	100
602	No	NL-072	NL-072-01	UU02-0008-V01	SAMEA8910819	ERS6593704	NA	Infant case-control	3	MiSeq	B	Infant	>=6 mo	Female	Netherlands	Utrecht	17-18	2017/12/20	2017/12/27	7	Yes	Yes	17	Severe	96205	133	33	4	44.8
603	No	NL-072	NL-072-03	UU02-0008-D03	SAMEA8910550	ERS6593435	NA	Infant case-control	2	NovaSeq 6000	B	Infant	>=6 mo	Female	Netherlands	Utrecht	17-18	2017/12/20	2017/12/29	9	Yes	Yes	17	Severe	2253190	3	85	0	0
604	No	NL-073	NL-073	UU02-0009-V01	SAMEA8910829	ERS6593714	MZ515733	Infant case-control	3	MiSeq	B	Infant	3 to <6 mo	Male	Netherlands	Utrecht	17-18	2018/01/02	2018/01/08	6	Yes	No	14	Severe	61723	676	41	20	90.7
605	No	NL-074	NL-074-01	UU02-0010-V01	SAMEA8910823	ERS6593708	MZ515983	Infant case-control	3	MiSeq	A	Infant	<3 mo	Female	Netherlands	Utrecht	17-18	2017/12/22	2017/12/27	5	Yes	No	11	Moderate	125477	845	38	25	92
606	No	NL-074	NL-074-02	UU02-0010-D02	SAMEA8910598	ERS6593483	MZ515705	Infant case-control	2	NovaSeq 6000	A	Infant	<3 mo	Female	Netherlands	Utrecht	17-18	2017/12/22	2017/12/28	6	Yes	No	11	Moderate	1151992	776	76	14	90.5
607	No	NL-074	NL-074-03	UU02-0010-D03	SAMEA8910497	ERS6593382	NA	Infant case-control	2	NovaSeq 6000	A	Infant	<3 mo	Female	Netherlands	Utrecht	17-18	2017/12/22	2017/12/29	7	Yes	No	11	Moderate	385627	194	85	3	62.9
608	No	NL-074	NL-074-05	UU02-0010-D05	SAMEA8910680	ERS6593565	NA	Infant case-control	2	NovaSeq 6000	A	Infant	<3 mo	Female	Netherlands	Utrecht	17-18	2017/12/22	2017/12/31	9	Yes	No	11	Moderate	742077	98	75	2	35.9
609	No	NL-075	NL-075-01	UU02-0011-V01	SAMEA8910816	ERS6593701	NA	Infant case-control	3	MiSeq	B	Infant	<3 mo	Female	Netherlands	Utrecht	17-18	2018/01/01	2018/01/08	7	Yes	No	9	Moderate	78523	276	35	8	67.2
610	No	NL-075	NL-075-02	UU02-0011-D02	SAMEA8910668	ERS6593553	NA	Infant case-control	2	NovaSeq 6000	B	Infant	<3 mo	Female	Netherlands	Utrecht	17-18	2018/01/01	2018/01/09	8	Yes	No	9	Moderate	244162	42	78	1	15.6
611	No	NL-075	NL-075-03	UU02-0011-D03	SAMEA8910409	ERS6593295	NA	Infant case-control	2	NovaSeq 6000	B	Infant	<3 mo	Female	Netherlands	Utrecht	17-18	2018/01/01	2018/01/10	9	Yes	No	9	Moderate	264755	NA	NA	NA	NA
612	Yes	NL-076	NL-076	UU02-0012-V01	SAMEA8910828	ERS6593713	MZ516058	Infant case-control	3	MiSeq	A	Infant	<3 mo	Male	Netherlands	Utrecht	17-18	2017/12/03	2017/12/08	5	No	No	3	Mild	98862	11851	56	358	100
613	Yes	NL-077	NL-077	UU02-0013-V01	SAMEA8910687	ERS6593572	MZ515612	Infant case-control	2	NovaSeq 6000	B	Infant	>=6 mo	Female	Netherlands	Utrecht	17-18	2017/12/04	2017/12/08	4	No	Yes	4	Mild	2084115	71033	91	1286	100
614	No	NL-078	NL-078-01	UU02-0014-V01	SAMEA8910691	ERS6593576	MZ515817	Infant case-control	2	NovaSeq 6000	B	Infant	<3 mo	Male	Netherlands	Utrecht	17-18	2017/12/07	2017/12/12	5	Yes	No	15	Severe	571293	4510	83	82	100
615	No	NL-078	NL-078-02	UU02-0014-D02	SAMEA8910470	ERS6593355	MZ515713	Infant case-control	2	NovaSeq 6000	B	Infant	<3 mo	Male	Netherlands	Utrecht	17-18	2017/12/07	2017/12/13	6	Yes	No	15	Severe	1478611	1699	85	31	99.2
616	No	NL-078	NL-078-03	UU02-0014-D03	SAMEA8910661	ERS6593546	MZ515673	Infant case-control	2	NovaSeq 6000	B	Infant	<3 mo	Male	Netherlands	Utrecht	17-18	2017/12/07	2017/12/14	7	Yes	No	15	Severe	866033	688	78	13	84.2
617	No	NL-078	NL-078-04	UU02-0014-D04	SAMEA8910412	ERS6593298	MZ515806	Infant case-control	2	NovaSeq 6000	B	Infant	<3 mo	Male	Netherlands	Utrecht	17-18	2017/12/07	2017/12/15	8	Yes	No	15	Severe	598495	1163	86	21	90
618	No	NL-078	NL-078-07	UU02-0014-D07	SAMEA8910445	ERS6593330	NA	Infant case-control	2	NovaSeq 6000	B	Infant	<3 mo	Male	Netherlands	Utrecht	17-18	2017/12/07	2017/12/18	11	Yes	No	15	Severe	508149	113	82	2	39.5
619	No	NL-078	NL-078-08	UU02-0014-D08	SAMEA8910441	ERS6593326	NA	Infant case-control	2	NovaSeq 6000	B	Infant	<3 mo	Male	Netherlands	Utrecht	17-18	2017/12/07	2017/12/19	12	Yes	No	15	Severe	159558	6	73	0	4.1
620	No	NL-078	NL-078-09	UU02-0014-D09	SAMEA8910482	ERS6593367	NA	Infant case-control	2	NovaSeq 6000	B	Infant	<3 mo	Male	Netherlands	Utrecht	17-18	2017/12/07	2017/12/20	13	Yes	No	15	Severe	399085	NA	NA	NA	NA
621	No	NL-078	NL-078-10	UU02-0014-D10	SAMEA8910474	ERS6593359	NA	Infant case-control	2	NovaSeq 6000	B	Infant	<3 mo	Male	Netherlands	Utrecht	17-18	2017/12/07	2017/12/21	14	Yes	No	15	Severe	299426	NA	NA	NA	NA
622	No	NL-078	NL-078-11	UU02-0014-D11	SAMEA8910546	ERS6593431	NA	Infant case-control	2	NovaSeq 6000	B	Infant	<3 mo	Male	Netherlands	Utrecht	17-18	2017/12/07	2017/12/22	15	Yes	No	15	Severe	274804	NA	NA	NA	NA
623	No	NL-079	NL-079	UU02-0015-V01	SAMEA8910835	ERS6593720	NA	Infant case-control	3	MiSeq	B	Infant	3 to <6 mo	Male	Netherlands	Utrecht	17-18	2017/12/10	2017/12/15	5	Yes	No	15	Severe	92841	120	28	4	40
624	Yes	NL-080	NL-080	UU02-0016-V01	SAMEA8910838	ERS6593723	MZ515939	Infant case-control	3	MiSeq	A	Infant	<3 mo	Male	Netherlands	Utrecht	17-18	2017/12/13	2017/12/14	1	Yes	Yes	4	Mild	386385	41497	85	1277	100
625	Yes	NL-081	NL-081-01	UU02-0017-V01	SAMEA8910847	ERS6593732	MZ516108	Infant case-control	3	MiSeq	A	Infant	3 to <6 mo	Male	Netherlands	Utrecht	17-18	2017/12/14	2017/12/15	1	Yes	No	10	Moderate	274628	26499	87	817	100
626	No	NL-081	NL-081-07	UU02-0017-D07	SAMEA8910540	ERS6593425	NA	Infant case-control	2	NovaSeq 6000	A	Infant	3 to <6 mo	Male	Netherlands	Utrecht	17-18	2017/12/14	2017/12/21	7	Yes	No	10	Moderate	269758	7	83	0	1
627	Yes	NL-082	NL-082-01	UU02-0018-V01	SAMEA8910866	ERS6593751	MZ515603	Infant case-control	3	MiSeq	B	Infant	<3 mo	Male	Netherlands	Utrecht	17-18	2017/12/13	2017/12/19	6	Yes	No	8	Moderate	91227	16337	65	510	100
628	No	NL-082	NL-082-03	UU02-0018-D03	SAMEA8910529	ERS6593414	NA	Infant case-control	2	NovaSeq 6000	B	Infant	<3 mo	Male	Netherlands	Utrecht	17-18	2017/12/13	2017/12/21	8	Yes	No	8	Moderate	325946	113	85	2	38.8
629	Yes	NL-083	NL-083	UU02-0019-V01	SAMEA8910861	ERS6593746	MZ515793	Infant case-control	3	MiSeq	B	Infant	>=6 mo	Male	Netherlands	Utrecht	17-18	2017/12/10	2017/12/18	8	Yes	Yes	9	Moderate	218794	24778	82	757	100
630	Yes	NL-084	NL-084-01	UU02-0020-V01	SAMEA8910814	ERS6593699	MZ516043	Infant case-control	3	MiSeq	A	Infant	3 to <6 mo	Female	Netherlands	Utrecht	17-18	2017/12/16	2017/12/19	3	Yes	Yes	13	Moderate	102500	10243	69	313	100
631	No	NL-084	NL-084-03	UU02-0020-D03	SAMEA8910570	ERS6593455	NA	Infant case-control	2	NovaSeq 6000	A	Infant	3 to <6 mo	Female	Netherlands	Utrecht	17-18	2017/12/16	2017/12/21	5	Yes	Yes	13	Moderate	325258	31	81	1	15
632	No	NL-085	NL-085	UU02-0022-V01	SAMEA8910788	ERS6593673	MZ515554	Infant case-control	3	MiSeq	B	Infant	<3 mo	Male	Netherlands	Utrecht	17-18	2017/12/17	2017/12/20	3	No	No	3	Mild	406168	1664	38	51	99.7
633	No	NL-086	NL-086-01	UU02-0023-V01	SAMEA8910833	ERS6593718	MZ515615	Infant case-control	3	MiSeq	B	Infant	<3 mo	Male	Netherlands	Utrecht	17-18	2017/12/12	2017/12/20	8	Yes	No	13	Moderate	64019	651	44	20	83.3
634	No	NL-086	NL-086-03	UU02-0023-D03	SAMEA8910463	ERS6593348	NA	Infant case-control	2	NovaSeq 6000	B	Infant	<3 mo	Male	Netherlands	Utrecht	17-18	2017/12/12	2017/12/22	10	Yes	No	13	Moderate	93392	13	87	0	5.8
635	No	NL-086	NL-086-08	UU02-0023-D08	SAMEA8910739	ERS6593624	NA	Infant case-control	2	NovaSeq 6000	B	Infant	<3 mo	Male	Netherlands	Utrecht	17-18	2017/12/12	2017/12/27	15	Yes	No	13	Moderate	1680476	38	71	1	13.5
636	Yes	NL-087	NL-087-01	UU02-0024-V01	SAMEA8910858	ERS6593743	MZ515918	Infant case-control	3	MiSeq	B	Infant	3 to <6 mo	Male	Netherlands	Utrecht	17-18	2017/12/15	2017/12/21	6	Yes	No	6	Mild	537423	60322	85	1827	100
637	No	NL-087	NL-087-07	UU02-0024-D07	SAMEA8910448	ERS6593333	NA	Infant case-control	2	NovaSeq 6000	B	Infant	3 to <6 mo	Male	Netherlands	Utrecht	17-18	2017/12/15	2017/12/27	12	Yes	No	6	Mild	171724	107	86	2	34.6
638	No	NL-087	NL-087-09	UU02-0024-D09	SAMEA8910500	ERS6593385	NA	Infant case-control	2	NovaSeq 6000	B	Infant	3 to <6 mo	Male	Netherlands	Utrecht	17-18	2017/12/15	2017/12/29	14	Yes	No	6	Mild	215121	1	88	0	0
639	No	NL-088	NL-088	UU02-0025-V01	SAMEA8910800	ERS6593685	MZ515968	Infant case-control	3	MiSeq	A	Infant	<3 mo	Female	Netherlands	Utrecht	17-18	2017/12/18	2017/12/22	4	Yes	No	9	Moderate	90753	758	42	23	89.8
640	Yes	NL-089	NL-089	UU02-0026-V01	SAMEA8910862	ERS6593747	MZ516077	Infant case-control	3	MiSeq	A	Infant	>=6 mo	Female	Netherlands	Utrecht	17-18	2017/12/20	2017/12/22	2	No	No	2	Mild	367985	38186	85	1182	100
641	No	NL-090	NL-090	UU02-0027-V01	SAMEA8910792	ERS6593677	NA	Infant case-control	3	MiSeq	B	Infant	<3 mo	Male	Netherlands	Utrecht	17-18	2017/12/24	2017/12/28	4	No	No	6	Mild	56324	16	24	0	4.5
642	Yes	NL-091	NL-091-01	UU02-0028-V01	SAMEA8910771	ERS6593656	MZ515665	Infant case-control	2	NovaSeq 6000	B	Infant	<3 mo	Male	Netherlands	Utrecht	17-18	2017/12/29	2017/12/31	2	Yes	No	18	Severe	1625940	87343	91	1572	100
643	Yes	NL-091	NL-091-03	UU02-0028-D03	SAMEA8910704	ERS6593589	MZ515730	Infant case-control	2	NovaSeq 6000	B	Infant	<3 mo	Male	Netherlands	Utrecht	17-18	2017/12/29	2018/01/02	4	Yes	No	18	Severe	981518	71351	89	1293	100
644	Yes	NL-091	NL-091-04	UU02-0028-D04	SAMEA8910517	ERS6593402	MZ515886	Infant case-control	2	NovaSeq 6000	B	Infant	<3 mo	Male	Netherlands	Utrecht	17-18	2017/12/29	2018/01/03	5	Yes	No	18	Severe	624004	24205	89	431	100
645	Yes	NL-091	NL-091-05	UU02-0028-D05	SAMEA8910729	ERS6593614	MZ516089	Infant case-control	2	NovaSeq 6000	B	Infant	<3 mo	Male	Netherlands	Utrecht	17-18	2017/12/29	2018/01/04	6	Yes	No	18	Severe	333735	14313	86	260	100
646	No	NL-091	NL-091-06	UU02-0028-D06	SAMEA8910655	ERS6593540	MZ515683	Infant case-control	2	NovaSeq 6000	B	Infant	<3 mo	Male	Netherlands	Utrecht	17-18	2017/12/29	2018/01/05	7	Yes	No	18	Severe	209753	3244	79	59	100
647	No	NL-091	NL-091-09	UU02-0028-D09	SAMEA8910483	ERS6593368	MZ515792	Infant case-control	2	NovaSeq 6000	B	Infant	<3 mo	Male	Netherlands	Utrecht	17-18	2017/12/29	2018/01/08	10	Yes	No	18	Severe	226202	1070	84	19	98.6
648	No	NL-091	NL-091-10	UU02-0028-D10	SAMEA8910624	ERS6593509	MZ515670	Infant case-control	2	NovaSeq 6000	B	Infant	<3 mo	Male	Netherlands	Utrecht	17-18	2017/12/29	2018/01/09	11	Yes	No	18	Severe	297111	887	80	16	96.4
649	No	NL-091	NL-091-11	UU02-0028-D11	SAMEA8910759	ERS6593644	MZ515808	Infant case-control	2	NovaSeq 6000	B	Infant	<3 mo	Male	Netherlands	Utrecht	17-18	2017/12/29	2018/01/10	12	Yes	No	18	Severe	304708	2714	78	48	98.4
650	No	NL-091	NL-091-12	UU02-0028-D12	SAMEA8910407	ERS6593293	MZ516034	Infant case-control	2	NovaSeq 6000	B	Infant	<3 mo	Male	Netherlands	Utrecht	17-18	2017/12/29	2018/01/11	13	Yes	No	18	Severe	377728	4230	88	76	100
651	Yes	NL-092	NL-092-01	UU02-0029-V01	SAMEA8910853	ERS6593738	MZ515770	Infant case-control	3	MiSeq	B	Infant	<3 mo	Male	Netherlands	Utrecht	17-18	2017/12/29	2018/01/03	5	Yes	No	13	Moderate	182250	19937	66	603	100
652	No	NL-092	NL-092-02	UU02-0029-D02	SAMEA8910573	ERS6593458	NA	Infant case-control	2	NovaSeq 6000	B	Infant	<3 mo	Male	Netherlands	Utrecht	17-18	2017/12/29	2018/01/04	6	Yes	No	13	Moderate	5538738	46	83	1	20.4
653	No	NL-092	NL-092-03	UU02-0029-D03	SAMEA8910649	ERS6593534	MZ516115	Infant case-control	2	NovaSeq 6000	B	Infant	<3 mo	Male	Netherlands	Utrecht	17-18	2017/12/29	2018/01/05	7	Yes	No	13	Moderate	197685	646	79	12	81
654	No	NL-092	NL-092-05	UU02-0029-D05	SAMEA8910399	ERS6593285	NA	Infant case-control	2	NovaSeq 6000	B	Infant	<3 mo	Male	Netherlands	Utrecht	17-18	2017/12/29	2018/01/07	9	Yes	No	13	Moderate	173724	43	87	1	19.5
655	No	NL-092	NL-092-06	UU02-0029-D06	SAMEA8910501	ERS6593386	MZ515587	Infant case-control	2	NovaSeq 6000	B	Infant	<3 mo	Male	Netherlands	Utrecht	17-18	2017/12/29	2018/01/08	10	Yes	No	13	Moderate	380565	4278	87	77	100
656	No	NL-092	NL-092-07	UU02-0029-D07	SAMEA8910733	ERS6593618	NA	Infant case-control	2	NovaSeq 6000	B	Infant	<3 mo	Male	Netherlands	Utrecht	17-18	2017/12/29	2018/01/09	11	Yes	No	13	Moderate	254012	NA	NA	NA	NA
657	No	NL-092	NL-092-08	UU02-0029-D08	SAMEA8910745	ERS6593630	NA	Infant case-control	2	NovaSeq 6000	B	Infant	<3 mo	Male	Netherlands	Utrecht	17-18	2017/12/29	2018/01/10	12	Yes	No	13	Moderate	239909	2	86	0	0
658	No	NL-092	NL-092-09	UU02-0029-D09	SAMEA8910676	ERS6593561	NA	Infant case-control	2	NovaSeq 6000	B	Infant	<3 mo	Male	Netherlands	Utrecht	17-18	2017/12/29	2018/01/11	13	Yes	No	13	Moderate	16486	NA	NA	NA	NA
659	No	NL-092	NL-092-11	UU02-0029-D11	SAMEA8911179	ERS6594063	NA	Infant case-control	4	NovaSeq 6000	B	Infant	<3 mo	Male	Netherlands	Utrecht	17-18	2017/12/29	2018/01/13	15	Yes	No	13	Moderate	360763	NA	NA	NA	NA
660	No	NL-092	NL-092-16	UU02-0029-D16	SAMEA8910769	ERS6593654	NA	Infant case-control	2	NovaSeq 6000	B	Infant	<3 mo	Male	Netherlands	Utrecht	17-18	2017/12/29	2018/01/18	20	Yes	No	13	Moderate	1096799	34	73	1	13.6
661	No	NL-093	NL-093	UU02-0030-V01	SAMEA8910854	ERS6593739	MZ515674	Infant case-control	3	MiSeq	B	Infant	<3 mo	Male	Netherlands	Utrecht	17-18	2017/12/29	2018/01/03	5	No	No	2	Mild	70687	3253	37	98	100
662	No	NL-094	NL-094	UU02-0031-V01	SAMEA8910844	ERS6593729	MZ515785	Infant case-control	3	MiSeq	B	Infant	>=6 mo	Female	Netherlands	Utrecht	17-18	2018/01/01	2018/01/05	4	No	Yes	5	Mild	175706	1013	44	30	77.6
663	No	NL-095	NL-095	UU02-0032-V01	SAMEA8910843	ERS6593728	MZ515714	Infant case-control	3	MiSeq	B	Infant	<3 mo	Male	Netherlands	Utrecht	17-18	2018/01/01	2018/01/05	4	Yes	No	7	Mild	86499	587	44	18	79.1
664	Yes	NL-096	NL-096	UU02-0033-V01	SAMEA8910685	ERS6593570	MZ515831	Infant case-control	2	NovaSeq 6000	B	Infant	>=6 mo	Female	Netherlands	Utrecht	17-18	2018/01/01	2018/01/05	4	No	Yes	4	Mild	3574166	119938	92	2139	100
665	No	NL-097	NL-097	UU02-0034-V01	SAMEA8910842	ERS6593727	MZ515869	Infant case-control	3	MiSeq	B	Infant	>=6 mo	Female	Netherlands	Utrecht	17-18	2018/01/02	2018/01/05	3	No	No	3	Mild	195456	2334	43	70	100
666	No	NL-098	NL-098-01	UU02-0035-V01	SAMEA8910815	ERS6593700	MZ515977	Infant case-control	3	MiSeq	B	Infant	<3 mo	Male	Netherlands	Utrecht	17-18	2018/01/05	2018/01/09	4	Yes	Yes	17	Severe	579129	8402	77	260	100
667	No	NL-098	NL-098-02	UU02-0035-D02	SAMEA8910644	ERS6593529	MZ515562	Infant case-control	2	NovaSeq 6000	B	Infant	<3 mo	Male	Netherlands	Utrecht	17-18	2018/01/05	2018/01/10	5	Yes	Yes	17	Severe	291195	9575	83	173	100
668	No	NL-098	NL-098-03	UU02-0035-D03	SAMEA8911177	ERS6594061	MZ515697	Infant case-control	4	NovaSeq 6000	B	Infant	<3 mo	Male	Netherlands	Utrecht	17-18	2018/01/05	2018/01/11	6	Yes	Yes	17	Severe	661430	332	79	6	74.4
669	No	NL-098	NL-098-04	UU02-0035-D04	SAMEA8910747	ERS6593632	NA	Infant case-control	2	NovaSeq 6000	B	Infant	<3 mo	Male	Netherlands	Utrecht	17-18	2018/01/05	2018/01/12	7	Yes	Yes	17	Severe	401868	208	77	4	60.8
670	No	NL-098	NL-098-08	UU02-0035-D08	SAMEA8910554	ERS6593439	NA	Infant case-control	2	NovaSeq 6000	B	Infant	<3 mo	Male	Netherlands	Utrecht	17-18	2018/01/05	2018/01/16	11	Yes	Yes	17	Severe	382907	NA	NA	NA	NA
671	No	NL-098	NL-098-10	UU02-0035-D10	SAMEA8910531	ERS6593416	NA	Infant case-control	2	NovaSeq 6000	B	Infant	<3 mo	Male	Netherlands	Utrecht	17-18	2018/01/05	2018/01/18	13	Yes	Yes	17	Severe	341535	NA	NA	NA	NA
672	No	NL-098	NL-098-11	UU02-0035-D11	SAMEA8910566	ERS6593451	NA	Infant case-control	2	NovaSeq 6000	B	Infant	<3 mo	Male	Netherlands	Utrecht	17-18	2018/01/05	2018/01/19	14	Yes	Yes	17	Severe	344027	NA	NA	NA	NA
673	No	NL-098	NL-098-14	UU02-0035-D14	SAMEA8910446	ERS6593331	NA	Infant case-control	2	NovaSeq 6000	B	Infant	<3 mo	Male	Netherlands	Utrecht	17-18	2018/01/05	2018/01/22	17	Yes	Yes	17	Severe	287845	NA	NA	NA	NA
674	Yes	NL-099	NL-099	UU02-0036-V01	SAMEA8910794	ERS6593679	MZ515663	Infant case-control	3	MiSeq	B	Infant	>=6 mo	Male	Netherlands	Utrecht	17-18	2018/01/06	2018/01/11	5	No	Yes	2	Mild	392063	17949	59	540	100
675	Yes	NL-100	NL-100	UU02-0037-V01	SAMEA8910851	ERS6593736	MZ516060	Infant case-control	3	MiSeq	B	Infant	<3 mo	Male	Netherlands	Utrecht	17-18	2018/01/06	2018/01/10	4	No	No	3	Mild	2687978	328189	86	5911	100
676	Yes	NL-101	NL-101	UU02-0038-V01	SAMEA8910683	ERS6593568	MZ515789	Infant case-control	2	NovaSeq 6000	A	Infant	>=6 mo	Male	Netherlands	Utrecht	17-18	2018/01/09	2018/01/12	3	Yes	Yes	10	Moderate	1864311	91493	91	1625	100
677	Yes	NL-102	NL-102-01	UU02-0039-V01	SAMEA8910848	ERS6593733	MZ515955	Infant case-control	3	MiSeq	B	Infant	<3 mo	Male	Netherlands	Utrecht	17-18	2018/01/11	2018/01/15	4	Yes	No	15	Severe	702899	66028	82	1997	100
678	No	NL-102	NL-102-04	UU02-0039-D04	SAMEA8910444	ERS6593329	MZ515995	Infant case-control	2	NovaSeq 6000	B	Infant	<3 mo	Male	Netherlands	Utrecht	17-18	2018/01/11	2018/01/18	7	Yes	No	15	Severe	1945092	4069	86	73	100
679	No	NL-102	NL-102-05	UU02-0039-D05	SAMEA8910748	ERS6593633	MZ515932	Infant case-control	2	NovaSeq 6000	B	Infant	<3 mo	Male	Netherlands	Utrecht	17-18	2018/01/11	2018/01/19	8	Yes	No	15	Severe	2613431	408	80	8	87.9
680	No	NL-102	NL-102-08	UU02-0039-D08	SAMEA8910708	ERS6593593	NA	Infant case-control	2	NovaSeq 6000	B	Infant	<3 mo	Male	Netherlands	Utrecht	17-18	2018/01/11	2018/01/22	11	Yes	No	15	Severe	70832	NA	NA	NA	NA
681	No	NL-102	NL-102-10	UU02-0039-D10	SAMEA8910765	ERS6593650	MZ516050	Infant case-control	2	NovaSeq 6000	B	Infant	<3 mo	Male	Netherlands	Utrecht	17-18	2018/01/11	2018/01/24	13	Yes	No	15	Severe	347174	3994	85	73	99.7
682	No	NL-102	NL-102-11	UU02-0039-D11	SAMEA8910439	ERS6593324	MZ515787	Infant case-control	2	NovaSeq 6000	B	Infant	<3 mo	Male	Netherlands	Utrecht	17-18	2018/01/11	2018/01/25	14	Yes	No	15	Severe	473105	2989	84	54	98.9
683	No	NL-103	NL-103-01	UU02-0040-V01	SAMEA8910865	ERS6593750	MZ515862	Infant case-control	3	MiSeq	A	Infant	3 to <6 mo	Female	Netherlands	Utrecht	17-18	2018/01/10	2018/01/16	6	Yes	Yes	17	Severe	151879	7557	80	231	100
684	No	NL-103	NL-103-03	UU02-0040-D03	SAMEA8910757	ERS6593642	MZ515641	Infant case-control	2	NovaSeq 6000	A	Infant	3 to <6 mo	Female	Netherlands	Utrecht	17-18	2018/01/10	2018/01/18	8	Yes	Yes	17	Severe	616379	5595	83	102	100
685	No	NL-103	NL-103-04	UU02-0040-D04	SAMEA8910677	ERS6593562	MZ515826	Infant case-control	2	NovaSeq 6000	A	Infant	3 to <6 mo	Female	Netherlands	Utrecht	17-18	2018/01/10	2018/01/19	9	Yes	Yes	17	Severe	126428	356	79	7	72.4
686	No	NL-103	NL-103-07	UU02-0040-D07	SAMEA8911175	ERS6594059	NA	Infant case-control	4	NovaSeq 6000	A	Infant	3 to <6 mo	Female	Netherlands	Utrecht	17-18	2018/01/10	2018/01/22	12	Yes	Yes	17	Severe	67872	NA	NA	NA	NA
687	No	NL-103	NL-103-09	UU02-0040-D09	SAMEA8910726	ERS6593611	NA	Infant case-control	2	NovaSeq 6000	A	Infant	3 to <6 mo	Female	Netherlands	Utrecht	17-18	2018/01/10	2018/01/24	14	Yes	Yes	17	Severe	71158	NA	NA	NA	NA
688	No	NL-104	NL-104-01	UU02-0041-V01	SAMEA8910777	ERS6593662	MZ515818	Infant case-control	3	MiSeq	B	Infant	<3 mo	Male	Netherlands	Utrecht	17-18	2018/01/12	2018/01/18	6	Yes	Yes	10	Moderate	86273	389	32	12	77.6
689	No	NL-104	NL-104-02	UU02-0041-D02	SAMEA8910621	ERS6593506	NA	Infant case-control	2	NovaSeq 6000	B	Infant	<3 mo	Male	Netherlands	Utrecht	17-18	2018/01/12	2018/01/19	7	Yes	Yes	10	Moderate	84036	NA	NA	NA	NA
690	No	NL-105	NL-105	UU02-0042-V01	SAMEA8910805	ERS6593690	NA	Infant case-control	3	MiSeq	B	Infant	3 to <6 mo	Female	Netherlands	Utrecht	17-18	2018/01/14	2018/01/22	8	Yes	Yes	12	Moderate	103053	16	30	0	5.2
691	Yes	NL-106	NL-106-01	UU02-0043-V01	SAMEA8910841	ERS6593726	MZ515565	Infant case-control	3	MiSeq	B	Infant	<3 mo	Male	Netherlands	Utrecht	17-18	2018/01/22	2018/01/25	3	Yes	Yes	17	Severe	307530	70056	66	2164	100
692	Yes	NL-106	NL-106-02	UU02-0043-D02	SAMEA8910432	ERS6593317	MZ515611	Infant case-control	2	NovaSeq 6000	B	Infant	<3 mo	Male	Netherlands	Utrecht	17-18	2018/01/22	2018/01/26	4	Yes	Yes	17	Severe	727529	40525	90	728	100
693	No	NL-106	NL-106-05	UU02-0043-D05	SAMEA8910766	ERS6593651	MZ515644	Infant case-control	2	NovaSeq 6000	B	Infant	<3 mo	Male	Netherlands	Utrecht	17-18	2018/01/22	2018/01/29	7	Yes	Yes	17	Severe	122546	1004	82	19	98.1
694	No	NL-106	NL-106-06	UU02-0043-D06	SAMEA8910609	ERS6593494	MZ515552	Infant case-control	2	NovaSeq 6000	B	Infant	<3 mo	Male	Netherlands	Utrecht	17-18	2018/01/22	2018/01/30	8	Yes	Yes	17	Severe	7963044	909	78	16	97.2
695	No	NL-106	NL-106-07	UU02-0043-D07	SAMEA8910586	ERS6593471	MZ515982	Infant case-control	2	NovaSeq 6000	B	Infant	<3 mo	Male	Netherlands	Utrecht	17-18	2018/01/22	2018/01/31	9	Yes	Yes	17	Severe	244340	296	83	5	72.6
696	No	NL-107	NL-107-01	UU02-0044-V01	SAMEA8910839	ERS6593724	MZ515736	Infant case-control	3	MiSeq	B	Infant	<3 mo	Male	Netherlands	Utrecht	17-18	2018/01/23	2018/01/26	3	Yes	No	18	Severe	430668	820	36	26	95.5
697	No	NL-107	NL-107-04	UU02-0044-D04	SAMEA8910755	ERS6593640	MZ515805	Infant case-control	2	NovaSeq 6000	B	Infant	<3 mo	Male	Netherlands	Utrecht	17-18	2018/01/23	2018/01/29	6	Yes	No	18	Severe	1410159	4446	83	80	99.9
698	No	NL-107	NL-107-05	UU02-0044-D05	SAMEA8910506	ERS6593391	MZ515625	Infant case-control	2	NovaSeq 6000	B	Infant	<3 mo	Male	Netherlands	Utrecht	17-18	2018/01/23	2018/01/30	7	Yes	No	18	Severe	4207204	6348	90	114	100
699	No	NL-107	NL-107-06	UU02-0044-D06	SAMEA8910434	ERS6593319	MZ515798	Infant case-control	2	NovaSeq 6000	B	Infant	<3 mo	Male	Netherlands	Utrecht	17-18	2018/01/23	2018/01/31	8	Yes	No	18	Severe	815874	740	82	13	87.8
700	No	NL-107	NL-107-08	UU02-0044-D08	SAMEA8910518	ERS6593403	MZ516084	Infant case-control	2	NovaSeq 6000	B	Infant	<3 mo	Male	Netherlands	Utrecht	17-18	2018/01/23	2018/02/02	10	Yes	No	18	Severe	333061	737	86	13	85
701	Yes	NL-108	NL-108-01	UU02-0045-V01	SAMEA8910850	ERS6593735	MZ515620	Infant case-control	3	MiSeq	A	Infant	<3 mo	Female	Netherlands	Utrecht	17-18	2018/01/22	2018/01/26	4	Yes	No	8	Moderate	290498	24933	87	761	100
702	No	NL-108	NL-108-04	UU02-0045-D04	SAMEA8910473	ERS6593358	MZ516055	Infant case-control	2	NovaSeq 6000	A	Infant	<3 mo	Female	Netherlands	Utrecht	17-18	2018/01/22	2018/01/29	7	Yes	No	8	Moderate	452133	2876	84	51	100
703	No	NL-108	NL-108-05	UU02-0045-D05	SAMEA8910622	ERS6593507	MZ515659	Infant case-control	2	NovaSeq 6000	A	Infant	<3 mo	Female	Netherlands	Utrecht	17-18	2018/01/22	2018/01/30	8	Yes	No	8	Moderate	803287	1307	78	24	98
704	No	NL-108	NL-108-06	UU02-0045-D06	SAMEA8910532	ERS6593417	NA	Infant case-control	2	NovaSeq 6000	A	Infant	<3 mo	Female	Netherlands	Utrecht	17-18	2018/01/22	2018/01/31	9	Yes	No	8	Moderate	974136	74	86	1	31.7
705	No	NL-108	NL-108-08	UU02-0045-D08	SAMEA8910457	ERS6593342	NA	Infant case-control	2	NovaSeq 6000	A	Infant	<3 mo	Female	Netherlands	Utrecht	17-18	2018/01/22	2018/02/02	11	Yes	No	8	Moderate	430057	1	88	0	0
706	No	NL-108	NL-108-13	UU02-0045-D13	SAMEA8910479	ERS6593364	NA	Infant case-control	2	NovaSeq 6000	A	Infant	<3 mo	Female	Netherlands	Utrecht	17-18	2018/01/22	2018/02/07	16	Yes	No	8	Moderate	234763	NA	NA	NA	NA
707	No	NL-109	NL-109-01	UU02-0046-V01	SAMEA8910836	ERS6593721	NA	Infant case-control	3	MiSeq	A/B	Infant	<3 mo	Male	Netherlands	Utrecht	17-18	2018/01/22	2018/01/30	8	Yes	Yes	15	Severe	134344	522	49	16	63.8
708	No	NL-109	NL-109-02	UU02-0046-D02	SAMEA8910623	ERS6593508	NA	Infant case-control	2	NovaSeq 6000	A	Infant	<3 mo	Male	Netherlands	Utrecht	17-18	2018/01/22	2018/01/31	9	Yes	Yes	15	Severe	305147	1	67	0	0
709	No	NL-109	NL-109-04	UU02-0046-D04	SAMEA8910442	ERS6593327	NA	Infant case-control	2	NovaSeq 6000	A	Infant	<3 mo	Male	Netherlands	Utrecht	17-18	2018/01/22	2018/02/02	11	Yes	Yes	15	Severe	1330081	70	86	1	23.2
710	Yes	NL-110	NL-110	UU02-0047-V01	SAMEA8910798	ERS6593683	MZ515703	Infant case-control	3	MiSeq	A	Infant	3 to <6 mo	Female	Netherlands	Utrecht	17-18	2018/01/30	2018/02/02	3	No	Yes	3	Mild	442837	61979	80	1759	100
711	Yes	NL-111	NL-111-01	UU02-0048-V01	SAMEA8910812	ERS6593697	MZ515865	Infant case-control	3	MiSeq	B	Infant	<3 mo	Female	Netherlands	Utrecht	17-18	2018/02/03	2018/02/08	5	Yes	No	11	Moderate	157054	11210	37	333	100
712	No	NL-111	NL-111-02	UU02-0048-D02	SAMEA8910499	ERS6593384	MZ516064	Infant case-control	2	NovaSeq 6000	B	Infant	<3 mo	Female	Netherlands	Utrecht	17-18	2018/02/03	2018/02/09	6	Yes	No	11	Moderate	1192325	772	86	14	97.1
713	No	NL-111	NL-111-05	UU02-0048-D05	SAMEA8910490	ERS6593375	NA	Infant case-control	2	NovaSeq 6000	B	Infant	<3 mo	Female	Netherlands	Utrecht	17-18	2018/02/03	2018/02/12	9	Yes	No	11	Moderate	1401193	22	87	0	5.4
714	No	NL-111	NL-111-06	UU02-0048-D06	SAMEA8910633	ERS6593518	NA	Infant case-control	2	NovaSeq 6000	B	Infant	<3 mo	Female	Netherlands	Utrecht	17-18	2018/02/03	2018/02/13	10	Yes	No	11	Moderate	214445	NA	NA	NA	NA
715	No	NL-111	NL-111-07	UU02-0048-D07	SAMEA8910422	ERS6593307	NA	Infant case-control	2	NovaSeq 6000	B	Infant	<3 mo	Female	Netherlands	Utrecht	17-18	2018/02/03	2018/02/14	11	Yes	No	11	Moderate	311175	14	82	0	7.3
716	No	NL-111	NL-111-09	UU02-0048-D09	SAMEA8910509	ERS6593394	NA	Infant case-control	2	NovaSeq 6000	B	Infant	<3 mo	Female	Netherlands	Utrecht	17-18	2018/02/03	2018/02/16	13	Yes	No	11	Moderate	216725	NA	NA	NA	NA
717	No	NL-112	NL-112	UU02-0049-V01	SAMEA8910786	ERS6593671	MZ515704	Infant case-control	3	MiSeq	B	Infant	3 to <6 mo	Male	Netherlands	Utrecht	17-18	2018/02/10	2018/02/14	4	No	Yes	5	Mild	133286	2297	34	67	100
718	No	NL-113	NL-113-01	UU02-0050-V01	SAMEA8910787	ERS6593672	MZ515754	Infant case-control	3	MiSeq	B	Infant	<3 mo	Female	Netherlands	Utrecht	17-18	2018/02/14	2018/02/20	6	Yes	No	14	Severe	560755	508	30	15	91
719	No	NL-113	NL-113-02	UU02-0050-D02	SAMEA8910712	ERS6593597	NA	Infant case-control	2	NovaSeq 6000	B	Infant	<3 mo	Female	Netherlands	Utrecht	17-18	2018/02/14	2018/02/21	7	Yes	No	14	Severe	195314	210	73	4	64.4
720	No	NL-113	NL-113-03	UU02-0050-D03	SAMEA8910744	ERS6593629	MZ515991	Infant case-control	2	NovaSeq 6000	B	Infant	<3 mo	Female	Netherlands	Utrecht	17-18	2018/02/14	2018/02/22	8	Yes	No	14	Severe	166387	3607	79	66	100
721	No	NL-113	NL-113-04	UU02-0050-D04	SAMEA8910614	ERS6593499	MZ515868	Infant case-control	2	NovaSeq 6000	B	Infant	<3 mo	Female	Netherlands	Utrecht	17-18	2018/02/14	2018/02/23	9	Yes	No	14	Severe	158549	2579	80	47	100
722	Yes	NL-114	NL-114-01	UU02-0051-V01	SAMEA8910821	ERS6593706	MZ515598	Infant case-control	3	MiSeq	B	Infant	<3 mo	Male	Netherlands	Utrecht	17-18	2018/03/22	2018/03/27	5	Yes	Yes	10	Moderate	246648	29393	82	911	100
723	No	NL-114	NL-114-02	UU02-0051-D02	SAMEA8910571	ERS6593456	MZ516094	Infant case-control	2	NovaSeq 6000	B	Infant	<3 mo	Male	Netherlands	Utrecht	17-18	2018/03/22	2018/03/28	6	Yes	Yes	10	Moderate	29445	2275	89	42	99.9
724	No	NL-114	NL-114-03	UU02-0051-D03	SAMEA8910709	ERS6593594	MZ515746	Infant case-control	2	NovaSeq 6000	B	Infant	<3 mo	Male	Netherlands	Utrecht	17-18	2018/03/22	2018/03/29	7	Yes	Yes	10	Moderate	232421	4258	86	77	99.9
725	No	NL-115	NL-115	UU02-0052-V01	SAMEA8910807	ERS6593692	MZ516016	Infant case-control	3	MiSeq	B	Infant	<3 mo	Male	Netherlands	Utrecht	17-18	2018/04/11	2018/04/18	7	Yes	No	9	Moderate	41209	1132	42	33	99.7
726	Yes	NL-116	NL-116-01	UU02-0053-V01	SAMEA8910852	ERS6593737	MZ516057	Infant case-control	3	MiSeq	A	Infant	<3 mo	Female	Netherlands	Utrecht	18-19	2019/02/09	2019/02/13	4	Yes	No	18	Severe	175732	14354	71	431	100
727	No	NL-116	NL-116-08	UU02-0053-D08	SAMEA8910471	ERS6593356	NA	Infant case-control	2	NovaSeq 6000	A	Infant	<3 mo	Female	Netherlands	Utrecht	18-19	2019/02/09	2019/02/20	11	Yes	No	18	Severe	381333	1	0	0	0
728	No	NL-116	NL-116-13	UU02-0053-D13	SAMEA8910438	ERS6593323	NA	Infant case-control	2	NovaSeq 6000	A	Infant	<3 mo	Female	Netherlands	Utrecht	18-19	2019/02/09	2019/02/25	16	Yes	No	18	Severe	505174	NA	NA	NA	NA
729	No	NL-117	NL-117	UU02-0054-V01	SAMEA8910775	ERS6593660	MZ515997	Infant case-control	3	MiSeq	B	Infant	<3 mo	Female	Netherlands	Utrecht	18-19	2018/11/28	2018/11/30	2	Yes	No	11	Moderate	105322	6831	57	210	100
730	No	NL-118	NL-118-01	UU02-0055-V01	SAMEA8910784	ERS6593669	MZ515866	Infant case-control	3	MiSeq	A	Infant	3 to <6 mo	Male	Netherlands	Utrecht	18-19	2018/11/14	2018/11/20	6	Yes	No	13	Moderate	156424	8604	82	263	100
731	No	NL-118	NL-118-02	UU02-0055-D02	SAMEA8910736	ERS6593621	MZ515564	Infant case-control	2	NovaSeq 6000	A	Infant	3 to <6 mo	Male	Netherlands	Utrecht	18-19	2018/11/14	2018/11/21	7	Yes	No	13	Moderate	296038	2704	83	49	99.7
732	No	NL-118	NL-118-03	UU02-0055-D03	SAMEA8910413	ERS6593299	MZ515675	Infant case-control	2	NovaSeq 6000	A	Infant	3 to <6 mo	Male	Netherlands	Utrecht	18-19	2018/11/14	2018/11/22	8	Yes	No	13	Moderate	361109	2130	88	38	96.7
733	No	NL-119	NL-119	UU02-0056-V01	SAMEA8910825	ERS6593710	MZ515586	Infant case-control	3	MiSeq	B	Infant	>=6 mo	Male	Netherlands	Utrecht	18-19	2018/11/22	2018/11/22	0	Yes	Yes	16	Severe	68214	1734	35	51	99.6
734	Yes	NL-120	NL-120	UU02-0057-V01	SAMEA8910802	ERS6593687	MZ516053	Infant case-control	3	MiSeq	A	Infant	<3 mo	Male	Netherlands	Utrecht	18-19	2018/11/25	2018/11/29	4	Yes	No	6	Mild	247952	49731	67	1493	100
735	No	NL-121	NL-121	UU02-0058-V01	SAMEA8910779	ERS6593664	MZ515632	Infant case-control	3	MiSeq	A	Infant	3 to <6 mo	Female	Netherlands	Utrecht	18-19	2018/11/30	2018/12/03	3	Yes	Yes	11	Moderate	127083	5914	86	186	100
736	No	NL-122	NL-122	UU02-0059-V01	SAMEA8910797	ERS6593682	NA	Infant case-control	3	MiSeq	B	Infant	3 to <6 mo	Female	Netherlands	Utrecht	18-19	2018/11/28	2018/12/04	6	Yes	No	3	Mild	119816	14	26	0	3.8
737	No	NL-123	NL-123	UU02-0060-V01	SAMEA8910796	ERS6593681	NA	Infant case-control	3	MiSeq	A/B	Infant	<3 mo	Female	Netherlands	Utrecht	18-19	2018/12/03	2018/12/10	7	Yes	Yes	10	Moderate	666940	37446	81	1101	100
738	Yes	NL-124	NL-124	UU02-0061-V01	SAMEA8910803	ERS6593688	MZ515945	Infant case-control	3	MiSeq	A	Infant	<3 mo	Male	Netherlands	Utrecht	18-19	2018/12/05	2018/12/11	6	Yes	No	16	Severe	254760	11174	81	339	100
739	Yes	NL-125	NL-125	UU02-0062-V01	SAMEA8910700	ERS6593585	MZ516003	Infant case-control	2	NovaSeq 6000	B	Infant	3 to <6 mo	Female	Netherlands	Utrecht	18-19	2018/12/13	2018/12/16	3	Yes	No	15	Severe	355751	20422	82	364	100
740	Yes	NL-126	NL-126	UU02-0063-V01	SAMEA8910697	ERS6593582	MZ516062	Infant case-control	2	NovaSeq 6000	B	Infant	<3 mo	Male	Netherlands	Utrecht	18-19	2018/12/08	2018/12/12	4	Yes	No	13	Moderate	2186299	57327	87	1030	100
741	No	NL-127	NL-127	UU02-0064-V01	SAMEA8910867	ERS6593752	MZ516136	Infant case-control	3	MiSeq	B	Infant	<3 mo	Female	Netherlands	Utrecht	18-19	2018/12/07	2018/12/13	6	Yes	No	3	Mild	95788	1157	33	33	96
742	No	NL-128	NL-128	UU02-0065-V01	SAMEA8910834	ERS6593719	NA	Infant case-control	3	MiSeq	B	Infant	<3 mo	Male	Netherlands	Utrecht	18-19	2018/12/07	2018/12/13	6	Yes	No	6	Mild	73328	19	30	1	8.9
743	No	NL-129	NL-129	UU02-0066-V01	SAMEA8910817	ERS6593702	NA	Infant case-control	3	MiSeq	B	Infant	<3 mo	Male	Netherlands	Utrecht	18-19	2018/12/11	2018/12/17	6	Yes	No	4	Mild	55298	30	32	1	14.3
744	No	NL-130	NL-130	UU02-0067-V01	SAMEA8910699	ERS6593584	MZ516048	Infant case-control	2	NovaSeq 6000	A	Infant	<3 mo	Male	Netherlands	Utrecht	18-19	2018/12/11	2018/12/17	6	Yes	No	18	Severe	1444976	2006	87	37	93.9
745	Yes	NL-131	NL-131	UU02-0068-V01	SAMEA8910859	ERS6593744	MZ516104	Infant case-control	3	MiSeq	B	Infant	<3 mo	Male	Netherlands	Utrecht	18-19	2018/12/10	2018/12/17	7	Yes	No	6	Mild	182452	26722	73	815	100
746	No	NL-132	NL-132	UU02-0069-V01	SAMEA8910822	ERS6593707	MZ516006	Infant case-control	3	MiSeq	B	Infant	<3 mo	Female	Netherlands	Utrecht	18-19	2018/12/13	2018/12/18	5	Yes	No	7	Mild	78685	707	30	20	91.3
747	Yes	NL-133	NL-133	UU02-0070-V01	SAMEA8910776	ERS6593661	MZ515731	Infant case-control	3	MiSeq	A	Infant	<3 mo	Female	Netherlands	Utrecht	18-19	2018/12/13	2018/12/18	5	Yes	No	15	Severe	155375	22016	73	628	100
748	No	NL-134	NL-134	UU02-0071-V01	SAMEA8910864	ERS6593749	MZ515574	Infant case-control	3	MiSeq	B	Infant	<3 mo	Female	Netherlands	Utrecht	18-19	2018/12/14	2018/12/19	5	Yes	No	15	Severe	171573	3061	45	89	100
749	No	NL-135	NL-135	UU02-0072-V01	SAMEA8910698	ERS6593583	NA	Infant case-control	2	NovaSeq 6000	A	Infant	<3 mo	Female	Netherlands	Utrecht	18-19	2018/12/13	2018/12/20	7	Yes	No	10	Moderate	288295	21	81	0	4
750	Yes	NL-136	NL-136	UU02-0073-V01	SAMEA8910857	ERS6593742	MZ515835	Infant case-control	3	MiSeq	A	Infant	<3 mo	Male	Netherlands	Utrecht	18-19	NA	2018/12/20	NA	Yes	No	15	Severe	424647	46223	85	1440	100
751	Yes	NL-137	NL-137	UU02-0074-V01	SAMEA8910840	ERS6593725	MZ515836	Infant case-control	3	MiSeq	B	Infant	<3 mo	Male	Netherlands	Utrecht	18-19	2018/12/18	2018/12/21	3	Yes	No	7	Mild	104347	15608	66	480	100
752	No	NL-138	NL-138	UU02-0075-V01	SAMEA8910789	ERS6593674	MZ515708	Infant case-control	3	MiSeq	B	Infant	<3 mo	Male	Netherlands	Utrecht	18-19	2018/12/23	2018/12/27	4	Yes	Yes	11	Moderate	83941	1985	48	61	96.6
753	Yes	NL-139	NL-139	UU02-0076-V01	SAMEA8910686	ERS6593571	MZ515560	Infant case-control	2	NovaSeq 6000	B	Infant	<3 mo	Male	Netherlands	Utrecht	18-19	2018/12/28	2019/01/02	5	Yes	No	18	Severe	686885	39035	90	705	100
754	No	NL-140	NL-140	UU02-0077-V01	SAMEA8910772	ERS6593657	MZ516119	Infant case-control	2	NovaSeq 6000	B	Infant	3 to <6 mo	Female	Netherlands	Utrecht	18-19	2018/12/27	2019/01/04	8	Yes	No	13	Moderate	521121	710	79	13	71.5
755	No	NL-141	NL-141	UU02-0078-V01	SAMEA8910846	ERS6593731	NA	Infant case-control	3	MiSeq	B	Infant	<3 mo	Female	Netherlands	Utrecht	18-19	2019/02/09	2019/02/13	4	Yes	No	15	Severe	258068	12	25	0	2.7
756	No	NL-142	NL-142	UU02-0079-V01	SAMEA8910845	ERS6593730	NA	Infant case-control	3	MiSeq	B	Infant	<3 mo	Male	Netherlands	Utrecht	18-19	2019/01/05	2019/01/10	5	Yes	No	12	Moderate	56504	224	30	7	60.7
757	No	NL-143	NL-143	UU02-0083-D01	SAMEA8963480	ERS6646229	NA	Infant case-control	3	MiSeq	NA	Infant	>=6 mo	Female	Netherlands	Utrecht	18-19	2018/12/02	2018/12/05	3	No	No	5	Mild	77497	NA	NA	NA	0
758	Yes	NL-144	NL-144	UU02-0084-V01	SAMEA8910695	ERS6593580	MZ516095	Infant case-control	2	NovaSeq 6000	B	Infant	>=6 mo	Female	Netherlands	Utrecht	18-19	2018/12/04	2018/12/07	3	No	No	5	Mild	2925247	127433	93	2306	100
759	No	NL-145	NL-145	UU02-0085-V01	SAMEA8910849	ERS6593734	MZ515725	Infant case-control	3	MiSeq	B	Infant	>=6 mo	Female	Netherlands	Utrecht	18-19	2018/12/05	2018/12/07	2	No	No	6	Mild	296354	980	29	27	97.7
760	Yes	NL-146	NL-146	UU02-0087-V01	SAMEA8910809	ERS6593694	MZ516110	Infant case-control	3	MiSeq	A	Infant	>=6 mo	Male	Netherlands	Utrecht	18-19	2018/12/12	2018/12/14	2	No	Yes	5	Mild	186092	11319	68	332	100
761	No	NL-147	NL-147	UU02-0088-V01	SAMEA8910837	ERS6593722	MZ515563	Infant case-control	3	MiSeq	B	Infant	>=6 mo	Male	Netherlands	Utrecht	18-19	2018/12/12	2018/12/14	2	No	No	3	Mild	97995	595	27	18	97.2
762	Yes	NL-148	NL-148	UU02-0089-V01	SAMEA8910702	ERS6593587	MZ516041	Infant case-control	2	NovaSeq 6000	B	Infant	3 to <6 mo	Female	Netherlands	Utrecht	18-19	2018/12/17	2018/12/18	1	No	No	1	Mild	19934029	810113	95	7477	100
763	Yes	NL-149	NL-149	UU02-0090-V01	SAMEA8910684	ERS6593569	MZ515828	Infant case-control	2	NovaSeq 6000	A	Infant	>=6 mo	Male	Netherlands	Utrecht	18-19	2018/12/16	2018/12/20	4	No	No	5	Mild	584000	24012	90	432	100
764	No	NL-150	NL-150	UU02-0091-V01	SAMEA8910818	ERS6593703	NA	Infant case-control	3	MiSeq	B	Infant	>=6 mo	Male	Netherlands	Utrecht	18-19	2018/12/15	2018/12/21	6	No	No	3	Mild	121010	8	0	0	3.9
765	No	NL-151	NL-151-01	UU02-0092-V01	SAMEA8910688	ERS6593573	NA	Infant case-control	2	NovaSeq 6000	A/B	Infant	3 to <6 mo	Male	Netherlands	Utrecht	18-19	2018/12/19	2018/12/21	2	Yes	Yes	12	Moderate	790045	30887	90	556	100
766	No	NL-151	NL-151-04	UU02-0092-D04	SAMEA8910467	ERS6593352	MZ515572	Infant case-control	2	NovaSeq 6000	A	Infant	3 to <6 mo	Male	Netherlands	Utrecht	18-19	2018/12/19	2018/12/24	5	Yes	Yes	12	Moderate	729817	4601	87	83	99.6
767	Yes	NL-152	NL-152	UU02-0093-V01	SAMEA8910682	ERS6593567	MZ515740	Infant case-control	2	NovaSeq 6000	A	Infant	>=6 mo	Female	Netherlands	Utrecht	18-19	2019/01/07	2019/01/10	3	No	Yes	3	Mild	767033	35398	88	636	100
768	No	NL-153	NL-153	UU02-0150-V01	SAMEA8911043	ERS6593928	MZ515581	Infant case-control	4	NovaSeq 6000	B	Infant	<3 mo	Male	Netherlands	Utrecht	19-20	2019/11/06	2019/11/08	2	Yes	No	2	Mild	1618276	9398	70	174	100
769	Yes	NL-154	NL-154	UU02-0151-V01	SAMEA8911121	ERS6594006	MZ515852	Infant case-control	4	NovaSeq 6000	A	Infant	<3 mo	Male	Netherlands	Utrecht	19-20	2019/11/10	2019/11/13	3	Yes	No	13	Moderate	436653	25919	86	475	100
770	Yes	NL-155	NL-155	UU02-0152-V01	SAMEA8911144	ERS6594029	MZ516113	Infant case-control	4	NovaSeq 6000	B	Infant	<3 mo	Male	Netherlands	Utrecht	19-20	2019/11/20	2019/11/22	2	Yes	No	16	Severe	227584	10607	83	196	100
771	No	NL-156	NL-156-01	UU02-0153-V01	SAMEA8911162	ERS6594047	NA	Infant case-control	4	NovaSeq 6000	A/B	Infant	<3 mo	Female	Netherlands	Utrecht	19-20	2019/11/21	2019/11/25	4	Yes	No	18	Severe	42664	2092	82	39	99.7
772	No	NL-156	NL-156-03	UU02-0153-D03	SAMEA8910912	ERS6593797	MZ515606	Infant case-control	4	NovaSeq 6000	A	Infant	<3 mo	Female	Netherlands	Utrecht	19-20	2019/11/21	2019/11/27	6	Yes	No	18	Severe	332051	4711	74	87	99.9
773	No	NL-156	NL-156-04	UU02-0153-D04	SAMEA8911033	ERS6593918	MZ516097	Infant case-control	4	NovaSeq 6000	A	Infant	<3 mo	Female	Netherlands	Utrecht	19-20	2019/11/21	2019/11/28	7	Yes	No	18	Severe	346230	2413	76	44	99.7
774	No	NL-156	NL-156-05	UU02-0153-D05	SAMEA8910932	ERS6593817	MZ516035	Infant case-control	4	NovaSeq 6000	A	Infant	<3 mo	Female	Netherlands	Utrecht	19-20	2019/11/21	2019/11/29	8	Yes	No	18	Severe	23814	565	72	10	86.1
775	Yes	NL-157	NL-157-01	UU02-0154-V01	SAMEA8911013	ERS6593898	MZ515568	Infant case-control	4	NovaSeq 6000	A	Infant	<3 mo	Male	Netherlands	Utrecht	19-20	2019/12/22	2019/12/23	1	Yes	No	11	Moderate	2463729	32454	91	597	100
776	No	NL-157	NL-157-05	UU02-0154-D05	SAMEA8911189	ERS6594073	MZ515700	Infant case-control	4	NovaSeq 6000	A	Infant	<3 mo	Male	Netherlands	Utrecht	19-20	2019/12/22	2019/12/27	5	Yes	No	11	Moderate	498203	4731	80	87	100
777	Yes	NL-158	NL-158-01	UU02-0155-V01	SAMEA8911072	ERS6593957	MZ515655	Infant case-control	4	NovaSeq 6000	A	Infant	<3 mo	Male	Netherlands	Utrecht	19-20	2019/12/06	2019/12/11	5	Yes	No	12	Moderate	1541089	33162	94	608	100
778	No	NL-158	NL-158-03	UU02-0155-D03	SAMEA8911056	ERS6593941	MZ515690	Infant case-control	4	NovaSeq 6000	A	Infant	<3 mo	Male	Netherlands	Utrecht	19-20	2019/12/06	2019/12/13	7	Yes	No	12	Moderate	705634	3246	75	60	99.9
779	No	NL-158	NL-158-04	UU02-0155-D04	SAMEA8911065	ERS6593950	MZ515702	Infant case-control	4	NovaSeq 6000	A	Infant	<3 mo	Male	Netherlands	Utrecht	19-20	2019/12/06	2019/12/14	8	Yes	No	12	Moderate	181567	533	72	10	72.8
780	No	NL-158	NL-158-08	UU02-0155-D08	SAMEA8911196	ERS6594080	MZ515888	Infant case-control	4	NovaSeq 6000	A	Infant	<3 mo	Male	Netherlands	Utrecht	19-20	2019/12/06	2019/12/18	12	Yes	No	12	Moderate	848760	1120	79	21	97.8
781	No	NL-158	NL-158-31	UU02-0155-D31	SAMEA8911012	ERS6593897	NA	Infant case-control	4	NovaSeq 6000	A	Infant	<3 mo	Male	Netherlands	Utrecht	19-20	2019/12/06	2020/01/10	35	Yes	No	12	Moderate	466212	NA	NA	NA	NA
782	No	NL-158	NL-158-34	UU02-0155-D34	SAMEA8910888	ERS6593773	NA	Infant case-control	4	NovaSeq 6000	A	Infant	<3 mo	Male	Netherlands	Utrecht	19-20	2019/12/06	2020/01/13	38	Yes	No	12	Moderate	465596	NA	NA	NA	NA
783	No	NL-158	NL-158-38	UU02-0155-D38	SAMEA8911048	ERS6593933	NA	Infant case-control	4	NovaSeq 6000	A	Infant	<3 mo	Male	Netherlands	Utrecht	19-20	2019/12/06	2020/01/17	42	Yes	No	12	Moderate	410456	NA	NA	NA	NA
784	No	NL-159	NL-159	UU02-0156-V01	SAMEA8910922	ERS6593807	MZ515950	Infant case-control	4	NovaSeq 6000	B	Infant	<3 mo	Male	Netherlands	Utrecht	19-20	2019/12/10	2019/12/14	4	Yes	No	15	Severe	401898	2493	77	46	99.7
785	No	NL-160	NL-160	UU02-0157-V01	SAMEA8911187	ERS6594071	MZ515741	Infant case-control	4	NovaSeq 6000	A	Infant	3 to <6 mo	Female	Netherlands	Utrecht	19-20	2019/12/12	2019/12/16	4	Yes	Yes	15	Severe	1610212	1487	81	27	97.2
786	No	NL-161	NL-161	UU02-0158-V01	SAMEA8911236	ERS6594120	NA	Infant case-control	4	NovaSeq 6000	A/B	Infant	3 to <6 mo	Male	Netherlands	Utrecht	19-20	2019/12/14	2019/12/17	3	Yes	No	10	Moderate	3149826	26651	93	491	100
787	Yes	NL-162	NL-162-01	UU02-0159-V01	SAMEA8911222	ERS6594106	MZ515931	Infant case-control	4	NovaSeq 6000	A	Infant	<3 mo	Male	Netherlands	Utrecht	19-20	2019/12/21	2019/12/23	2	Yes	No	8	Moderate	772291	39030	89	715	100
788	No	NL-162	NL-162-05	UU02-0159-D05	SAMEA8910879	ERS6593764	NA	Infant case-control	4	NovaSeq 6000	A	Infant	<3 mo	Male	Netherlands	Utrecht	19-20	2019/12/21	2019/12/27	6	Yes	No	8	Moderate	205389	6	68	0	1.9
789	Yes	NL-163	NL-163-01	UU02-0160-V01	SAMEA8911151	ERS6594036	MZ515616	Infant case-control	4	NovaSeq 6000	A	Infant	<3 mo	Female	Netherlands	Utrecht	19-20	2019/12/22	2019/12/24	2	Yes	Yes	15	Severe	513517	15762	86	290	100
790	No	NL-163	NL-163-04	UU02-0160-D04	SAMEA8910954	ERS6593839	MZ516118	Infant case-control	4	NovaSeq 6000	A	Infant	<3 mo	Female	Netherlands	Utrecht	19-20	2019/12/22	2019/12/27	5	Yes	Yes	15	Severe	770857	2823	79	52	100
791	Yes	NL-164	NL-164-01	UU02-0161-V01	SAMEA8911224	ERS6594108	MZ516038	Infant case-control	4	NovaSeq 6000	A	Infant	<3 mo	Male	Netherlands	Utrecht	19-20	2019/12/22	2019/12/24	2	Yes	No	17	Severe	6314777	164623	95	2899	100
792	No	NL-164	NL-164-04	UU02-0161-D04	SAMEA8911005	ERS6593890	MZ515580	Infant case-control	4	NovaSeq 6000	A	Infant	<3 mo	Male	Netherlands	Utrecht	19-20	2019/12/22	2019/12/27	5	Yes	No	17	Severe	273589	3560	76	65	100
793	No	NL-164	NL-164-07	UU02-0161-D07	SAMEA8911051	ERS6593936	NA	Infant case-control	4	NovaSeq 6000	A	Infant	<3 mo	Male	Netherlands	Utrecht	19-20	2019/12/22	2019/12/30	8	Yes	No	17	Severe	274452	69	69	1	29.9
794	No	NL-164	NL-164-08	UU02-0161-D08	SAMEA8911020	ERS6593905	NA	Infant case-control	4	NovaSeq 6000	A	Infant	<3 mo	Male	Netherlands	Utrecht	19-20	2019/12/22	2019/12/31	9	Yes	No	17	Severe	292102	41	57	1	16.6
795	No	NL-164	NL-164-10	UU02-0161-D10	SAMEA8911201	ERS6594085	NA	Infant case-control	4	NovaSeq 6000	A	Infant	<3 mo	Male	Netherlands	Utrecht	19-20	2019/12/22	2020/01/02	11	Yes	No	17	Severe	817489	2	71	0	0
796	No	NL-164	NL-164-14	UU02-0161-D14	SAMEA8910971	ERS6593856	NA	Infant case-control	4	NovaSeq 6000	A	Infant	<3 mo	Male	Netherlands	Utrecht	19-20	2019/12/22	2020/01/06	15	Yes	No	17	Severe	391433	NA	NA	NA	NA
797	No	NL-164	NL-164-16	UU02-0161-D16	SAMEA8911114	ERS6593999	NA	Infant case-control	4	NovaSeq 6000	A	Infant	<3 mo	Male	Netherlands	Utrecht	19-20	2019/12/22	2020/01/08	17	Yes	No	17	Severe	487673	NA	NA	NA	NA
798	No	NL-164	NL-164-21	UU02-0161-D21	SAMEA8911110	ERS6593995	NA	Infant case-control	4	NovaSeq 6000	A	Infant	<3 mo	Male	Netherlands	Utrecht	19-20	2019/12/22	2020/01/13	22	Yes	No	17	Severe	227313	NA	NA	NA	NA
799	No	NL-164	NL-164-28	UU02-0161-D28	SAMEA8910887	ERS6593772	NA	Infant case-control	4	NovaSeq 6000	A	Infant	<3 mo	Male	Netherlands	Utrecht	19-20	2019/12/22	2020/01/20	29	Yes	No	17	Severe	21765	NA	NA	NA	NA
800	No	NL-165	NL-165	UU02-0162-V01	SAMEA8911167	ERS6594052	NA	Infant case-control	4	NovaSeq 6000	B	Infant	<3 mo	Female	Netherlands	Utrecht	19-20	2019/12/20	2019/12/24	4	Yes	No	11	Moderate	707605	253	75	5	52
801	No	NL-166	NL-166	UU02-0163-V01	SAMEA8910998	ERS6593883	MZ515957	Infant case-control	4	NovaSeq 6000	A	Infant	<3 mo	Male	Netherlands	Utrecht	19-20	2019/12/25	2019/12/27	2	Yes	No	8	Moderate	379403	2695	74	49	99.8
802	No	NL-167	NL-167-01	UU02-0164-V01	SAMEA8910996	ERS6593881	MZ515780	Infant case-control	4	NovaSeq 6000	A	Infant	<3 mo	Male	Netherlands	Utrecht	19-20	2019/12/28	2019/12/30	2	Yes	No	16	Severe	406783	3010	70	55	100
803	No	NL-167	NL-167-02	UU02-0164-D02	SAMEA8911040	ERS6593925	MZ515906	Infant case-control	4	NovaSeq 6000	A	Infant	<3 mo	Male	Netherlands	Utrecht	19-20	2019/12/28	2019/12/31	3	Yes	No	16	Severe	350315	2055	82	38	92.7
804	No	NL-167	NL-167-04	UU02-0164-D04	SAMEA8911046	ERS6593931	NA	Infant case-control	4	NovaSeq 6000	A	Infant	<3 mo	Male	Netherlands	Utrecht	19-20	2019/12/28	2020/01/02	5	Yes	No	16	Severe	76618	13	71	0	4.7
805	No	NL-167	NL-167-05	UU02-0164-D05	SAMEA8911227	ERS6594111	NA	Infant case-control	4	NovaSeq 6000	A	Infant	<3 mo	Male	Netherlands	Utrecht	19-20	2019/12/28	2020/01/03	6	Yes	No	16	Severe	766493	53	77	1	20.9
806	Yes	NL-168	NL-168-01	UU02-0165-V01	SAMEA8910973	ERS6593858	MZ515720	Infant case-control	4	NovaSeq 6000	A	Infant	<3 mo	Male	Netherlands	Utrecht	19-20	2020/01/03	2020/01/07	4	Yes	No	17	Severe	1002206	72368	86	1322	100
807	Yes	NL-168	NL-168-02	UU02-0165-D02	SAMEA8911170	ERS6594054	MZ515709	Infant case-control	4	NovaSeq 6000	A	Infant	<3 mo	Male	Netherlands	Utrecht	19-20	2020/01/03	2020/01/08	5	Yes	No	17	Severe	1026480	20287	82	373	100
808	No	NL-168	NL-168-03	UU02-0165-D03	SAMEA8911146	ERS6594031	NA	Infant case-control	4	NovaSeq 6000	A	Infant	<3 mo	Male	Netherlands	Utrecht	19-20	2020/01/03	2020/01/09	6	Yes	No	17	Severe	346859	79	67	1	34.5
809	No	NL-168	NL-168-04	UU02-0165-D04	SAMEA8911137	ERS6594022	NA	Infant case-control	4	NovaSeq 6000	A	Infant	<3 mo	Male	Netherlands	Utrecht	19-20	2020/01/03	2020/01/10	7	Yes	No	17	Severe	309991	14	76	0	2.7
810	No	NL-168	NL-168-07	UU02-0165-D07	SAMEA8911230	ERS6594114	NA	Infant case-control	4	NovaSeq 6000	A	Infant	<3 mo	Male	Netherlands	Utrecht	19-20	2020/01/03	2020/01/13	10	Yes	No	17	Severe	795004	4	69	0	1.6
811	No	NL-168	NL-168-09	UU02-0165-D09	SAMEA8911081	ERS6593966	NA	Infant case-control	4	NovaSeq 6000	A	Infant	<3 mo	Male	Netherlands	Utrecht	19-20	2020/01/03	2020/01/15	12	Yes	No	17	Severe	149285	NA	NA	NA	NA
812	No	NL-168	NL-168-11	UU02-0165-D11	SAMEA8911194	ERS6594078	NA	Infant case-control	4	NovaSeq 6000	A	Infant	<3 mo	Male	Netherlands	Utrecht	19-20	2020/01/03	2020/01/17	14	Yes	No	17	Severe	337104	2	67	0	1.7
813	Yes	NL-169	NL-169-01	UU02-0166-V01	SAMEA8910893	ERS6593778	MZ515699	Infant case-control	4	NovaSeq 6000	B	Infant	>=6 mo	Female	Netherlands	Utrecht	19-20	2020/01/05	2020/01/09	4	Yes	Yes	9	Moderate	558954	32964	89	599	100
814	No	NL-169	NL-169-05	UU02-0166-D05	SAMEA8910892	ERS6593777	MZ515664	Infant case-control	4	NovaSeq 6000	B	Infant	>=6 mo	Female	Netherlands	Utrecht	19-20	2020/01/05	2020/01/13	8	Yes	Yes	9	Moderate	402355	2203	71	41	99.8
815	No	NL-169	NL-169-06	UU02-0166-D06	SAMEA8911221	ERS6594105	MZ515965	Infant case-control	4	NovaSeq 6000	B	Infant	>=6 mo	Female	Netherlands	Utrecht	19-20	2020/01/05	2020/01/14	9	Yes	Yes	9	Moderate	279911	692	81	13	96.8
816	No	NL-169	NL-169-07	UU02-0166-D07	SAMEA8911101	ERS6593986	NA	Infant case-control	4	NovaSeq 6000	B	Infant	>=6 mo	Female	Netherlands	Utrecht	19-20	2020/01/05	2020/01/15	10	Yes	Yes	9	Moderate	1441211	50	72	1	18.6
817	No	NL-170	NL-170-01	UU02-0167-V01	SAMEA8911003	ERS6593888	MZ515821	Infant case-control	4	NovaSeq 6000	A	Infant	<3 mo	Male	Netherlands	Utrecht	19-20	2020/01/15	2020/01/20	5	Yes	Yes	14	Severe	225829	4028	70	74	99.9
818	No	NL-170	NL-170-02	UU02-0167-D02	SAMEA8911231	ERS6594115	NA	Infant case-control	4	NovaSeq 6000	A	Infant	<3 mo	Male	Netherlands	Utrecht	19-20	2020/01/15	2020/01/21	6	Yes	Yes	14	Severe	294347	7	59	0	3.6
819	No	NL-170	NL-170-03	UU02-0167-D03	SAMEA8911098	ERS6593983	NA	Infant case-control	4	NovaSeq 6000	A	Infant	<3 mo	Male	Netherlands	Utrecht	19-20	2020/01/15	2020/01/22	7	Yes	Yes	14	Severe	234948	9	65	0	2.2
820	No	NL-170	NL-170-04	UU02-0167-D04	SAMEA8910950	ERS6593835	NA	Infant case-control	4	NovaSeq 6000	A	Infant	<3 mo	Male	Netherlands	Utrecht	19-20	2020/01/15	2020/01/23	8	Yes	Yes	14	Severe	197589	1	75	0	0
821	No	NL-171	NL-171-01	UU02-0169-V01	SAMEA8911122	ERS6594007	MZ516005	Infant case-control	4	NovaSeq 6000	A	Infant	<3 mo	Male	Netherlands	Utrecht	19-20	2020/02/02	2020/02/06	4	Yes	Yes	11	Moderate	146532	1259	71	23	98.5
822	No	NL-171	NL-171-02	UU02-0169-D02	SAMEA8911171	ERS6594055	MZ516138	Infant case-control	4	NovaSeq 6000	A	Infant	<3 mo	Male	Netherlands	Utrecht	19-20	2020/02/02	2020/02/07	5	Yes	Yes	11	Moderate	486256	392	74	7	78.5
823	No	NL-172	NL-172-01	UU02-0170-D01	SAMEA8963481	ERS6646230	NA	Infant case-control	4	NovaSeq 6000	NA	Infant	3 to <6 mo	Male	Netherlands	Utrecht	19-20	2020/02/03	2020/02/06	3	Yes	No	9	Moderate	403690	NA	NA	NA	0
824	No	NL-172	NL-172-02	UU02-0170-D02	SAMEA8963482	ERS6646231	NA	Infant case-control	4	NovaSeq 6000	NA	Infant	3 to <6 mo	Male	Netherlands	Utrecht	19-20	2020/02/03	2020/02/07	4	Yes	No	9	Moderate	215446	NA	NA	NA	0
825	No	NL-173	NL-173	UU02-0200-V01	SAMEA8910962	ERS6593847	MZ515724	Infant case-control	4	NovaSeq 6000	B	Infant	>=6 mo	Female	Netherlands	Utrecht	19-20	2019/11/10	2019/11/14	4	No	No	3	Mild	311112	6676	77	124	100
826	No	NL-174	NL-174	UU02-0201-V01	SAMEA8911134	ERS6594019	NA	Infant case-control	4	NovaSeq 6000	B	Infant	<3 mo	Male	Netherlands	Utrecht	19-20	2019/11/11	2019/11/14	3	No	No	2	Mild	379785	51	70	1	19.4
827	No	NL-175	NL-175	UU02-0202-V01	SAMEA8911150	ERS6594035	MZ515790	Infant case-control	4	NovaSeq 6000	A	Infant	3 to <6 mo	Female	Netherlands	Utrecht	19-20	2019/11/18	2019/11/21	3	No	No	3	Mild	1059852	9333	91	173	100
828	Yes	NL-176	NL-176	UU02-0203-V01	SAMEA8910899	ERS6593784	MZ516044	Infant case-control	4	NovaSeq 6000	A	Infant	3 to <6 mo	Male	Netherlands	Utrecht	19-20	2019/11/23	2019/11/27	4	No	No	4	Mild	719700	11394	80	209	100
829	No	NL-177	NL-177	UU02-0204-V01	SAMEA8911206	ERS6594090	NA	Infant case-control	4	NovaSeq 6000	A	Infant	<3 mo	Female	Netherlands	Utrecht	19-20	2019/11/28	2019/12/02	4	No	Yes	6	Mild	681068	203	75	4	52.7
830	Yes	NL-178	NL-178	UU02-0205-V01	SAMEA8911204	ERS6594088	MZ515985	Infant case-control	4	NovaSeq 6000	A	Infant	<3 mo	Male	Netherlands	Utrecht	19-20	2019/12/01	2019/12/05	4	No	No	6	Mild	1042743	27651	91	507	100
831	No	NL-179	NL-179	UU02-0206-V01	SAMEA8911235	ERS6594119	NA	Infant case-control	4	NovaSeq 6000	B	Infant	>=6 mo	Male	Netherlands	Utrecht	19-20	2019/12/05	2019/12/09	4	No	No	4	Mild	1310355	180	80	3	60.2
832	Yes	NL-180	NL-180	UU02-0207-V01	SAMEA8911010	ERS6593895	MZ515650	Infant case-control	4	NovaSeq 6000	A	Infant	<3 mo	Male	Netherlands	Utrecht	19-20	2019/12/08	2019/12/11	3	No	No	4	Mild	1701992	80970	94	1492	100
833	No	NL-181	NL-181	UU02-0208-V01	SAMEA8910985	ERS6593870	MZ515875	Infant case-control	4	NovaSeq 6000	A	Infant	>=6 mo	Female	Netherlands	Utrecht	19-20	2019/12/07	2019/12/11	4	No	No	5	Mild	458161	663	82	12	80.4
834	No	NL-182	NL-182	UU02-0209-V01	SAMEA8911143	ERS6594028	NA	Infant case-control	4	NovaSeq 6000	NA	Infant	<3 mo	Male	Netherlands	Utrecht	19-20	2019/12/06	2019/12/12	6	No	No	5	Mild	1875	2	33	0	0
835	No	NL-183	NL-183	UU02-0210-V01	SAMEA8911212	ERS6594096	MZ515946	Infant case-control	4	NovaSeq 6000	B	Infant	>=6 mo	Female	Netherlands	Utrecht	19-20	2019/12/08	2019/12/13	5	No	No	3	Mild	1105719	3167	80	59	100
836	Yes	NL-184	NL-184	UU02-0211-V01	SAMEA8911220	ERS6594104	MZ516132	Infant case-control	4	NovaSeq 6000	A	Infant	>=6 mo	Male	Netherlands	Utrecht	19-20	2019/12/09	2019/12/13	4	No	No	3	Mild	1058677	16612	90	305	100
837	No	NL-185	NL-185	UU02-0212-V01	SAMEA8911053	ERS6593938	MZ515711	Infant case-control	4	NovaSeq 6000	B	Infant	>=6 mo	Female	Netherlands	Utrecht	19-20	2019/12/08	2019/12/14	6	No	No	4	Mild	614529	769	81	14	87.2
838	Yes	NL-186	NL-186	UU02-0213-V01	SAMEA8911216	ERS6594100	MZ515859	Infant case-control	4	NovaSeq 6000	A	Infant	3 to <6 mo	Male	Netherlands	Utrecht	19-20	2019/12/12	2019/12/14	2	No	Yes	5	Mild	1433823	62590	91	1149	100
839	Yes	NL-187	NL-187	UU02-0214-V01	SAMEA8910915	ERS6593800	MZ515975	Infant case-control	4	NovaSeq 6000	B	Infant	3 to <6 mo	Female	Netherlands	Utrecht	19-20	2019/12/13	2019/12/14	1	No	No	2	Mild	691770	28601	90	523	100
840	No	NL-188	NL-188	UU02-0215-V01	SAMEA8911004	ERS6593889	NA	Infant case-control	4	NovaSeq 6000	B	Infant	<3 mo	Male	Netherlands	Utrecht	19-20	2019/12/14	2019/12/17	3	No	No	5	Mild	136805	66	63	1	25.7
841	No	NL-189	NL-189	UU02-0216-V01	SAMEA8910876	ERS6593761	NA	Infant case-control	4	NovaSeq 6000	A	Infant	<3 mo	Male	Netherlands	Utrecht	19-20	2019/12/12	2019/12/17	5	No	No	4	Mild	227568	167	65	3	54.4
842	Yes	NL-190	NL-190	UU02-0217-V01	SAMEA8910911	ERS6593796	MZ515631	Infant case-control	4	NovaSeq 6000	A	Infant	3 to <6 mo	Male	Netherlands	Utrecht	19-20	2019/12/14	2019/12/18	4	No	No	4	Mild	1671802	62767	95	1145	100
843	No	NL-191	NL-191	UU02-0218-V01	SAMEA8911070	ERS6593955	NA	Infant case-control	4	NovaSeq 6000	A/B	Infant	<3 mo	Male	Netherlands	Utrecht	19-20	2019/12/15	2019/12/20	5	No	No	2	Mild	400131	124	72	2	37.3
844	Yes	NL-192	NL-192	UU02-0220-V01	SAMEA8910869	ERS6593754	MZ516026	Infant case-control	4	NovaSeq 6000	A	Infant	3 to <6 mo	Female	Netherlands	Utrecht	19-20	2019/12/18	2019/12/23	5	No	No	2	Mild	439211	19302	82	354	100
845	No	NL-193	NL-193	UU02-0221-V01	SAMEA8911038	ERS6593923	MZ516103	Infant case-control	4	NovaSeq 6000	A	Infant	3 to <6 mo	Male	Netherlands	Utrecht	19-20	2019/12/27	2019/12/31	4	No	No	1	Mild	186202	2965	72	55	99.9
846	No	NL-194	NL-194	UU02-0222-V01	SAMEA8910870	ERS6593755	NA	Infant case-control	4	NovaSeq 6000	B	Infant	3 to <6 mo	Female	Netherlands	Utrecht	19-20	2020/01/03	2020/01/07	4	No	No	2	Mild	1131337	49	69	1	19.2
847	Yes	NL-195	NL-195	UU03-0022-V02	SAMEA8910773	ERS6593658	MZ516082	Adult cohort	2	NovaSeq 6000	B	Adult	60 to <75 yr	Female	Netherlands	Utrecht	17-18	2017/12/13	2017/12/18	5	No	No	NA	Mild	423272	10553	82	192	100
848	Yes	NL-196	NL-196	UU03-0037-V02	SAMEA8910774	ERS6593659	MZ516032	Adult cohort	2	NovaSeq 6000	B	Adult	60 to <75 yr	Female	Netherlands	Utrecht	17-18	2017/12/01	2017/12/04	3	No	Yes	NA	Moderate	2644486	248725	88	4280	100
849	Yes	NL-197	NL-197	UU03-0060-V02	SAMEA8910690	ERS6593575	MZ515973	Adult cohort	2	NovaSeq 6000	A	Adult	60 to <75 yr	Female	Netherlands	Utrecht	17-18	2017/12/08	2017/12/11	3	No	No	NA	Mild	292081	11468	81	207	100
850	No	NL-198	NL-198	UU03-0084-V02	SAMEA8910795	ERS6593680	MZ515648	Adult cohort	3	MiSeq	B	Adult	60 to <75 yr	Female	Netherlands	Utrecht	17-18	2018/04/15	2018/04/17	2	No	No	NA	Mild	77211	2756	39	78	99.9
851	No	NL-199	NL-199	UU03-0134-V02	SAMEA8910694	ERS6593579	MZ515996	Adult cohort	2	NovaSeq 6000	B	Adult	60 to <75 yr	Male	Netherlands	Utrecht	17-18	2018/01/20	2018/01/22	2	No	No	NA	Mild	2497242	9928	77	181	100
852	No	NL-200	NL-200	UU03-0353-V02	SAMEA8910832	ERS6593717	MZ515893	Adult cohort	3	MiSeq	B	Adult	>=75 yr	Male	Netherlands	Utrecht	18-19	2018/12/30	2019/01/02	3	No	No	NA	Mild	104447	383	26	11	90.7
853	Yes	NL-201	NL-201	UU03-0355-V02	SAMEA8910826	ERS6593711	MZ515974	Adult cohort	3	MiSeq	B	Adult	>=75 yr	Female	Netherlands	Utrecht	18-19	2018/12/21	2018/12/24	3	No	Yes	NA	Mild	563292	46835	61	1322	100
854	No	NL-203	NL-203	UU03-0367-V02	SAMEA8910701	ERS6593586	MZ515799	Adult cohort	2	NovaSeq 6000	B	Adult	>=75 yr	Female	Netherlands	Utrecht	18-19	2019/01/09	2019/01/14	5	No	No	NA	Mild	6419182	42163	81	765	100
855	Yes	NL-204	NL-204	UU03-0385-V02	SAMEA8910810	ERS6593695	MZ515764	Adult cohort	3	MiSeq	B	Adult	60 to <75 yr	Female	Netherlands	Utrecht	18-19	2019/02/28	2019/03/04	4	No	No	NA	Moderate	125494	20377	45	575	100
856	Yes	NL-205	NL-205	UU03-0391-V02	SAMEA8910703	ERS6593588	MZ515990	Adult cohort	2	NovaSeq 6000	B	Adult	>=75 yr	Female	Netherlands	Utrecht	18-19	2019/02/02	2019/02/04	2	No	Yes	NA	Mild	3553641	328577	89	5561	100
857	No	NL-206	NL-206	UU03-0408-V02	SAMEA8910804	ERS6593689	MZ516059	Adult cohort	3	MiSeq	B	Adult	>=75 yr	Male	Netherlands	Utrecht	18-19	2019/01/09	2019/01/15	6	No	No	NA	Mild	36019	1185	31	34	99.9
858	No	NL-207	NL-207	UU03-0452-V02	SAMEA8910791	ERS6593676	MZ516079	Adult cohort	3	MiSeq	B	Adult	>=75 yr	Female	Netherlands	Utrecht	18-19	2019/01/22	2019/01/24	2	No	Yes	NA	Mild	54722	909	40	28	97.1
